# Supplementary material for: Transition-metal-free synthesis of 5-amino-1,2,3-triazoles via nucleophilic addition/cyclization of carbodiimides with diazo compounds
Source: Royal Society of Chemistry journal article supplement (doi:10.1039/d0qo01288b), 2020-12-10

# Transition-Metal-Free Synthesis of 5-Amino-1,2,3-triazoles via Nucleophilic Addition/Cyclization of Carbodiimides with Diazo Compounds

Shilong Wang, Yuanyuan Zhang, Guixin Liu, Hui Xu, Lijuan Song, Jinchun Chen, Jiazhu Li, and Zhen Zhang\*

College of Chemistry and Chemical Engineering, Yantai University, Yantai, 264005, P. R. China.

*E-mail:* zhangz@ytu.edu.cn

## Table of Contents

|                                                                                         |     |
|-----------------------------------------------------------------------------------------|-----|
| 1. General.....                                                                         | S2  |
| 2. General procedure for the synthesis of 5-amino-1,2,3-triazole.....                   | S2  |
| 3. General procedure for the synthesis of fully substituted 5-amino-1,2,3-triazoles..   | S2  |
| 4. Procedure for the isomerization of 5-amino-1,2,3-triazoles.....                      | S3  |
| 5. Control experiments.....                                                             | S3  |
| 6. Procedure for the synthesis of triazolo[4,5- <i>b</i> ]quinolin-9-one <b>7</b> ..... | S3  |
| 7. Procedure for gram-scale synthesis of product <b>3a</b> .....                        | S4  |
| 8. Another possible mechanism.....                                                      | S4  |
| 9. Characteristic data of 5-amino-1,2,3-triazoles.....                                  | S5  |
| 10. Crystal data and structure refinement for <b>3x</b> .....                           | S17 |
| 11. Computational details.....                                                          | S26 |
| 12. Copy of <sup>1</sup> H and <sup>13</sup> C NMR for new Compounds.....               | S39 |

## 1. General

All reactions were performed in a glass vial under nitrogen atmosphere. The boiling point of petroleum ether is between 60 °C and 90 °C. For chromatography, 200-300 mesh silica gel (Qingdao, China) was employed.  $^1\text{H}$ ,  $^{13}\text{C}$  and  $^{19}\text{F}$  NMR spectra were recorded on Ascend 400, Bruker Biospin GmbH 500 spectrometer. Chemical shifts are reported in ppm relative to  $\text{CDCl}_3$  ( $^1\text{H}$ , TMS  $\delta$  0;  $^{13}\text{C}$ ,  $\delta$  77.16),  $\text{DMSO}-d_6$  ( $^1\text{H}$ ,  $\delta$  2.50;  $^{13}\text{C}$ ,  $\delta$  39.52). HMRS were obtained on a Bruker SolanX 70 FT-MS or Waters Xevo G2-XS QT spectrometer. All reagents and solvents were obtained from commercial sources and used as supplied unless otherwise noted. All carbodiimides<sup>[1]</sup> and diazo compounds<sup>[2]</sup> were prepared according to literature methods, respectively.

## 2. General procedure for the synthesis of 5-amino-1,2,3-triazole

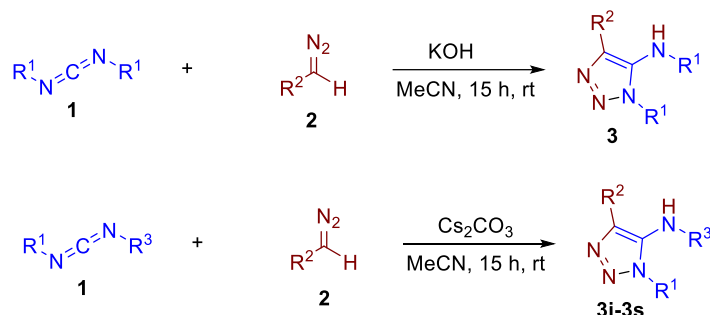

To a 20 mL dry thick walled tube equipped with a magnetic stir bar, was added KOH (0.45 mmol, 25.2 mg, flaky KOH needs to be crushed), MeCN (5 mL) and Ethyl diazoacetate **2a** (0.36 mmol, 41.1 mg, added slowly), the mixture was stirred for 5 min. Then, and carbodiimide **1a** (0.3 mmol, 58.2 mg) was added. The flask was sealed and the reaction mixture was stirred at rt for 15 h. Upon the reaction completed, the mixture was concentrated under reduced pressure. The resulting crude residue was purified via flash column chromatography (petroleum ether/ethyl acetate = 7:1-5:1) on silica gel to afford the desired product **3a** (75 mg, 81%). *Note: the purity of the carbodiimide will affect its reactivity.*

For unsymmetric carbodiimides,  $\text{Cs}_2\text{CO}_3$  was used as base instead of KOH.

## 3. General procedure for the synthesis of fully substituted 5-amino-1,2,3-triazoles

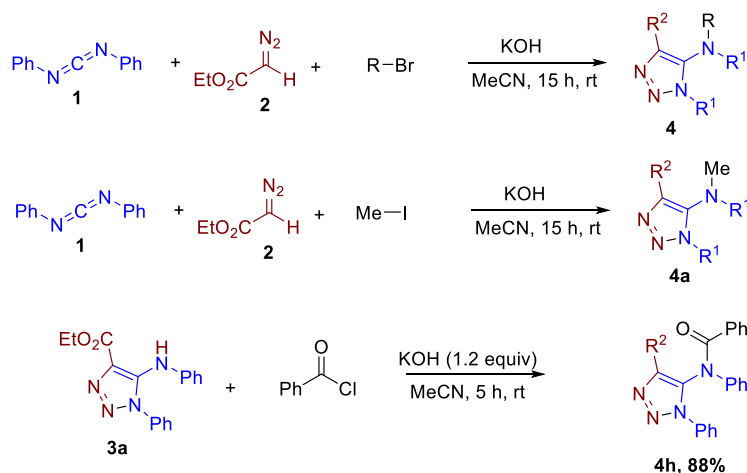

To a 20 mL dry thick walled tube equipped with a magnetic stir bar, was added KOH (0.3 mmol, 25.2 mg, flaky KOH needs to be crushed), MeCN (4 mL) and ethyl diazoacetate **2a** (0.36 mmol,

41.1 mg, added slowly). The mixture was stirred for 5 mins. Then, carbodiimide **1a** (0.3 mmol, 58.2 mg) and bromide (0.45 mmol) was added. The flask was sealed and the reaction mixture was stirred at rt for 15 h. Upon the reaction completed, the mixture was concentrated under reduced pressure. The resulting crude residue was purified via flash column chromatography (petroleum ether/ethyl acetate = 6:1 to 4:1) on silica gel to afford the desired product **4**. For **4a**, MeI was used as halides. For **4h**, the product was synthesized from the reaction of isolated **3a** with benzoyl chloride.

#### 4. Procedure for the isomerization of 5-amino-1,2,3-triazoles

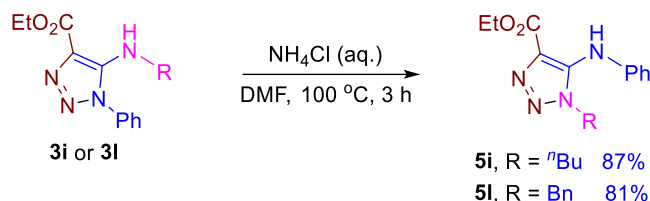

To a 20 mL dry thick walled tube equipped with a magnetic stir bar, was added **3** (0.2 mmol), DMF (2 mL) and saturated  $\text{NH}_4\text{Cl}$  aqueous solution 0.5 mL. The mixture was stirred at 100 °C for 3 h. Upon the reaction completed, 15 mL  $\text{H}_2\text{O}$  was added to mixture and extracted with dichloromethane (15 mL x 3). The combined organic layer was dried (anhydrous  $\text{Na}_2\text{SO}_4$ ), filtered, and evaporated followed by a silica gel column chromatography (petroleum ether/ethyl acetate = 5:1) to afford desired product **5**.

#### 5. Control experiments

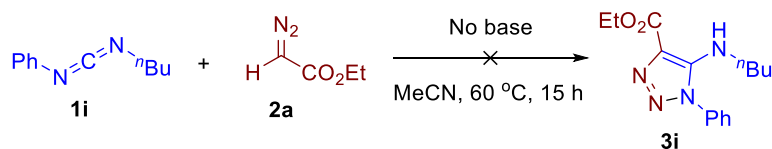

To a 10 mL dry thick walled tube equipped with a magnetic stir bar, was added MeCN (2 mL) and Ethyl diazoacetate **2a** (0.18 mmol, 20.5 mg) and carbodiimide **1i** (0.15 mmol, 26.1 mg) was added. The flask was sealed and the reaction mixture was stirred at 60 °C for 15 h.

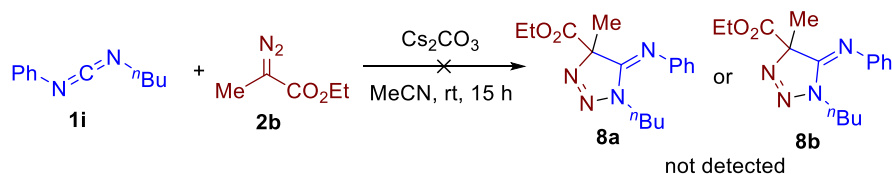

To a 10 mL dry thick walled tube equipped with a magnetic stir bar, was added MeCN (2 mL)  $\text{Cs}_2\text{CO}_3$  (0.225 mmol, 73.3 mg) and diazo **2b** (0.18 mmol, 23.0 mg, added slowly), the mixture was stirred for 5 min. Then carbodiimide **1i** (0.15 mmol, 26.1 mg) was added. The flask was sealed and the reaction mixture was stirred at rt for 15 h.

#### 6. Procedure for the synthesis of triazolo[4,5-b]quinolin-9-one **7**

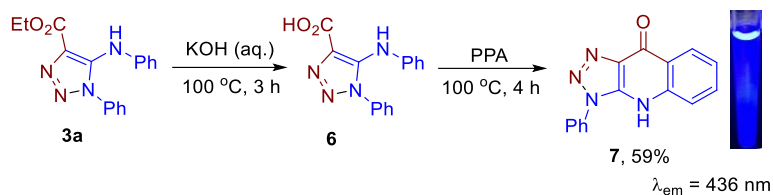

To a 10 mL thick walled tubes equipped with a magnetic stir bar, were added **3** (0.2 mmol, 61.6 mg), KOH aqueous solution (1N, 2 mL). The tube were sealed and the reaction mixture was stirred at 100 °C for 3 h. Upon the reaction completed, the reaction mixture was quenched with HCl solution (1 N, 3 mL) and extracted with dichloromethane (5 mL x 3). The combined organic layer was dried (anhydrous Na<sub>2</sub>SO<sub>4</sub>), filtered, and evaporated to give crude **6**, which was used in the following step without further purifications.

To a 10 mL thick walled tubes equipped with a magnetic stir bar, were added the above obtained crude **6** and 1 mL PPA (polyphosphoric acid). The tube were sealed and the reaction mixture was stirred at 100 °C for 4 h. Upon the reaction completed, the reaction mixture was poured slowly into ice water (50 mL). The mixture was extracted with EtOAc (20 mL x 3). The combined organic layer was dried (anhydrous Na<sub>2</sub>SO<sub>4</sub>), filtered, and evaporated followed by a silica gel column chromatography (petroleum ether/ethyl acetate = 1:1) to afford desired product **7**.

## 7. Procedure for gram-scale synthesis of product 3a

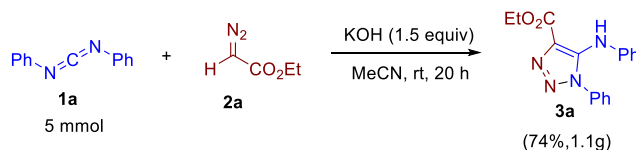

To a 250 mL dry thick walled tube equipped with a magnetic stir bar, was added KOH (7.5 mmol, 420 mg, flaky KOH needs to be crushed), MeCN (80 mL). Ethyl diazoacetate **2a** (6 mmol, 684 mg) were added dropwise and the mixture was stirred for 25 min. Then carbodiimide **1a** (5 mmol, 58.2 mg) was added under 0 °C. The flask was sealed and was slowly warmed to room temperature. The reaction mixture continued to be stirred for 15 h. Upon the reaction completed, the mixture was concentrated under reduced pressure. The resulting crude residue was purified via flash column chromatography (petroleum ether/ethyl acetate = 7:1-5:1) on silica gel to afford the desired product **3a**.

## 8. Another possible mechanism

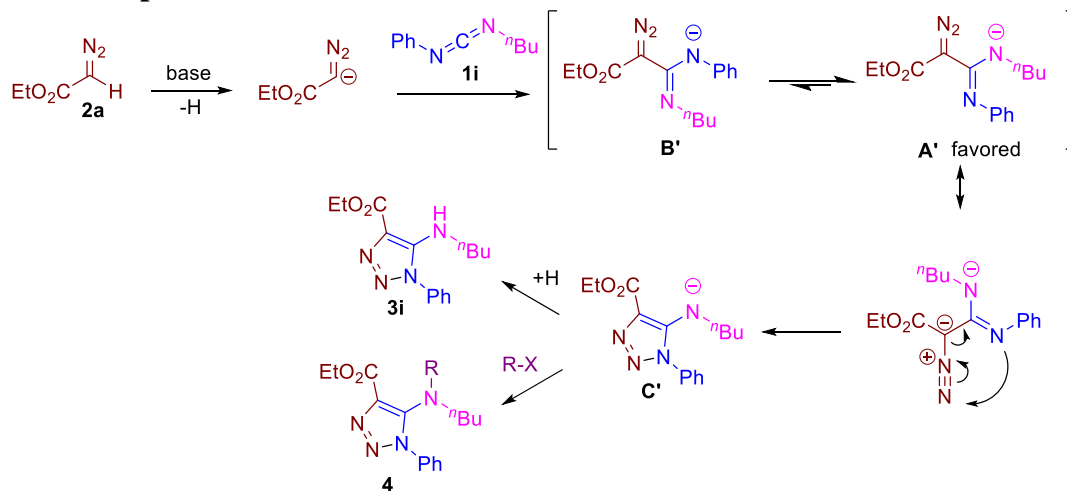

For another plausible process, first, **2a** is deprotonated in base condition, and then undergoes a nucleophilic addition to carbodiimide **1i**, giving anionic intermediate **A'** and **B'**. The favored isomer **A'** is more prone to undergo a cascade intramolecular cyclization, giving desired anionic intermediate **C'**. Subsequently, hydrogen capture or participation of halides render the generation triazole **3i** and **4** respectively.

## 9. Characteristic Data of 5-amino-1,2,3-triazoles

### ethyl 1-phenyl-5-(phenylamino)-1H-1,2,3-triazole-4-carboxylate (**3a**)

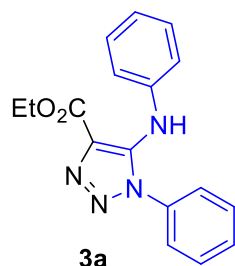

White solid; yield 81% (75 mg); mp 124–125 °C;

<sup>1</sup>H NMR (600 MHz, CDCl<sub>3</sub>) δ 7.89 (s, 1H), 7.37 (dd, *J* = 7.7, 2.1 Hz, 2H), 7.25 – 7.20 (m, 3H), 7.00 (dd, *J* = 8.5, 7.3 Hz, 2H), 6.87 (t, *J* = 7.4 Hz, 1H), 6.70 (d, *J* = 8.2 Hz, 2H), 4.47 (q, *J* = 7.1 Hz, 2H), 1.46 (t, *J* = 7.1 Hz, 3H).

<sup>13</sup>C NMR (151 MHz, CDCl<sub>3</sub>) δ 163.15, 143.29, 138.29, 135.97, 129.04, 128.94, 128.91, 124.56, 124.27, 123.54, 120.88, 61.24, 14.55.

HRMS (ESI): [M+H]<sup>+</sup> calcd for C<sub>17</sub>H<sub>17</sub>N<sub>4</sub>O<sub>2</sub><sup>+</sup>, 309.1346; found, 309.1348

### ethyl 1-(*o*-tolyl)-5-(*o*-tolylamino)-1H-1, 2, 3-triazole-4-carboxylate (**3b**)

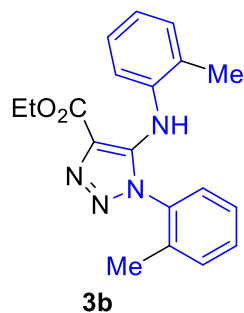

White solid; yield 73% (73mg); mp 85–86 °C;

<sup>1</sup>H NMR (500 MHz, CDCl<sub>3</sub>) δ 7.66 (s, 1H), 7.13 – 7.09 (m, 1H), 7.05 (d, *J* = 7.6 Hz, 1H), 7.01 – 6.93 (m, 3H), 6.84 (t, *J* = 7.3 Hz, 1H), 6.72 (t, *J* = 7.6 Hz, 1H), 6.59 (d, *J* = 7.9 Hz, 1H), 4.49 (q, *J* = 7.1 Hz, 2H), 2.21 (s, 3H), 2.09 (s, 3H), 1.48 (t, *J* = 7.1 Hz, 3H).

<sup>13</sup>C NMR (126 MHz, CDCl<sub>3</sub>) δ 163.52, 145.85, 136.15, 134.85, 134.71, 132.49, 130.85, 130.51, 129.87, 127.89, 126.65, 126.40, 125.98, 124.22, 122.40, 61.11, 17.92, 17.78, 14.61.

HRMS (ESI): [M+H]<sup>+</sup> calcd for C<sub>19</sub>H<sub>21</sub>N<sub>4</sub>O<sub>2</sub><sup>+</sup>, 337.1659; found, 337.1658

### ethyl 1-(*m*-tolyl)-5-(*m*-tolylamino)-1H-1, 2, 3-triazole-4-carboxylate (**3c**)

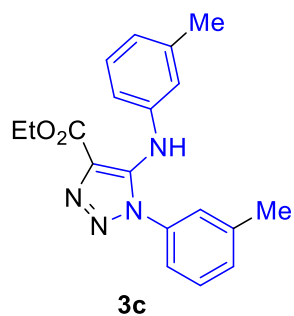

White solid; yield 82% (83 mg); mp 106–107 °C;

<sup>1</sup>H NMR (500 MHz, CDCl<sub>3</sub>) δ 7.86 (s, 1H), 7.18 – 7.08 (m, 3H), 7.01 (d, *J* = 7.4 Hz, 1H), 6.91 (t, *J* = 7.7 Hz, 1H), 6.68 (d, *J* = 7.5 Hz, 1H), 6.55 (d, *J* = 7.7 Hz, 1H), 6.47 (s, 1H), 4.47 (q, *J* = 7.1 Hz, 2H), 2.21 (s, 3H), 2.06 (s, 3H), 1.45 (t, *J* = 7.1 Hz, 3H).

<sup>13</sup>C NMR (126 MHz, CDCl<sub>3</sub>) δ 163.21, 143.47, 139.11, 138.75, 137.96, 135.95, 129.58, 128.74, 128.67, 125.09, 124.28, 124.13, 121.92, 120.68, 118.30, 61.17, 21.13, 21.09, 14.57.

HRMS (ESI): [M+H]<sup>+</sup> calcd for C<sub>19</sub>H<sub>21</sub>N<sub>4</sub>O<sub>2</sub><sup>+</sup>, 337.1659; found, 337.1657

**ethyl 1-(p-tolyl)-5-(p-tolylamino)-1H-1,2,3-triazole-4-carboxylate (3d)**

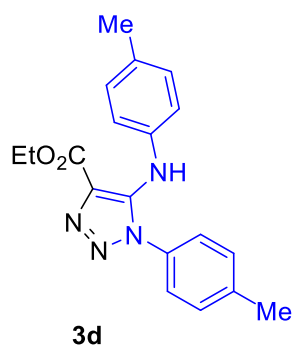

White solid; yield 77% (78 mg); mp 67–68 °C;

<sup>1</sup>H NMR (500 MHz, CDCl<sub>3</sub>) δ 7.70 (s, 1H), 7.15 (d, *J* = 8.2 Hz, 2H), 6.95 (d, *J* = 8.1 Hz, 2H), 6.73 (d, *J* = 8.1 Hz, 2H), 6.52 (d, *J* = 8.2 Hz, 2H), 4.39 (q, *J* = 7.1 Hz, 2H), 2.20 (s, 3H), 2.09 (s, 3H), 1.38 (t, *J* = 7.1 Hz, 3H).

<sup>13</sup>C NMR (126 MHz, CDCl<sub>3</sub>) δ 163.23, 143.66, 138.97, 135.87, 133.95, 133.56, 129.54, 129.41, 124.24, 123.47, 121.10, 61.16, 21.22, 20.78, 14.58.

HRMS (ESI): [M+H]<sup>+</sup> calcd for C<sub>19</sub>H<sub>21</sub>N<sub>4</sub>O<sub>2</sub><sup>+</sup>, 337.1659; found, 337.1657

**ethyl 1-(4-chlorophenyl)-5-((4-chlorophenyl)amino)-1H-1,2,3-triazole-4-carboxylate (3e)**

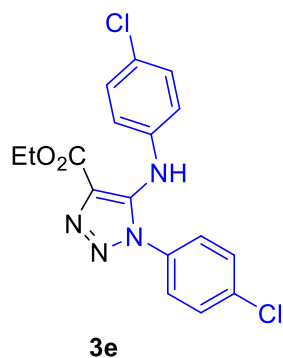

White solid; yield 68% (77 mg); mp 139–140 °C;

<sup>1</sup>H NMR (500 MHz, CDCl<sub>3</sub>) δ 7.84 (s, 1H), 7.39 – 7.32 (m, 2H), 7.30 – 7.24 (m, 2H), 7.03 (d, *J* = 8.8 Hz, 2H), 6.64 (d, *J* = 8.7 Hz, 2H), 4.47 (q, *J* = 7.1 Hz, 2H), 1.45 (t, *J* = 7.1 Hz, 3H).

<sup>13</sup>C NMR (126 MHz, CDCl<sub>3</sub>) δ 162.99, 142.90, 137.08, 135.25, 134.24, 129.84, 129.52, 129.24, 125.15, 124.54, 121.80, 61.49, 14.51.

HRMS (ESI): [M+H]<sup>+</sup> calcd for C<sub>17</sub>H<sub>15</sub>C<sub>12</sub>N<sub>4</sub>O<sub>2</sub><sup>+</sup>, 377.0567; found, 377.0561

**ethyl 1-(4-methoxyphenyl)-5-((4-methoxyphenyl)amino)-1H-1,2,3-triazole-4-carboxylate (3f)**

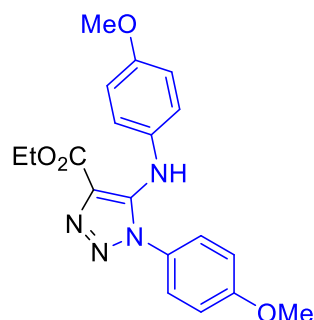

**3f**

White solid; yield 69% (76 mg); mp 81–82 °C;

<sup>1</sup>H NMR (500 MHz, CDCl<sub>3</sub>) δ 7.79 (s, 1H), 7.21 – 7.13 (m, 2H), 6.74 – 6.64 (m, 4H), 6.58 – 6.50 (m, 2H), 4.47 (q, *J* = 7.1 Hz, 2H), 3.74 (s, 3H), 3.67 (s, 3H), 1.46 (t, *J* = 7.1 Hz, 3H).

<sup>13</sup>C NMR (126 MHz, CDCl<sub>3</sub>) δ 163.35, 159.76, 156.94, 144.50, 131.03, 128.86, 125.61, 124.05, 123.23, 114.10, 114.03, 61.07, 55.61, 55.55, 14.59.

HRMS (ESI): [M+H]<sup>+</sup> calcd for C<sub>19</sub>H<sub>21</sub>N<sub>4</sub>O<sub>4</sub><sup>+</sup>, 369.1557; found, 369.1553

**ethyl 1-(4-fluorophenyl)-5-((4-fluorophenyl)amino)-1H-1,2,3-triazole-4-carboxylate (3g)**

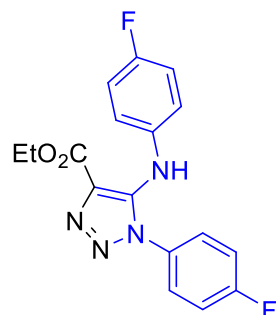

**3g**

White solid; yield 85% (88 mg); mp 115–116 °C;

<sup>1</sup>H NMR (400 MHz, CDCl<sub>3</sub>) δ 7.87 (s, 1H), 7.34 – 7.28 (m, 2H), 6.99 – 6.91 (m, 2H), 6.78 – 6.66 (m, 4H), 4.48 (q, *J* = 7.1 Hz, 2H), 1.46 (t, *J* = 7.1 Hz, 3H).

<sup>13</sup>C NMR (101 MHz, CDCl<sub>3</sub>) δ 163.20, 162.48 (d, *J* = 250.9 Hz), 159.85 (d, *J* = 245.2 Hz), 143.92, 134.16 (d, *J* = 2.9 Hz), 131.87 (d, *J* = 3.3 Hz), 125.88 (d, *J* = 9.1 Hz), 124.09, 123.62 (d, *J* = 8.6 Hz), 116.17 (d, *J* = 23.1 Hz), 115.89 (d, *J* = 22.9 Hz), 61.36, 14.55.

HRMS (ESI): [M+H]<sup>+</sup> calcd for C<sub>17</sub>H<sub>15</sub>F<sub>2</sub>N<sub>4</sub>O<sub>2</sub><sup>+</sup>, 345.1163; found, 345.1167

**ethyl 5-(butylamino)-1-phenyl-1H-1,2,3-triazole-4-carboxylate (3i)**

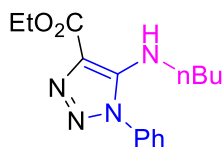

**3i**

Colorless liquid; yield 80% (69 mg);

$^1\text{H NMR}$  (600 MHz,  $\text{CDCl}_3$ )  $\delta$  7.59 – 7.47 (m, 5H), 6.08 (s, 1H), 4.44 (q,  $J = 7.1$  Hz, 2H), 2.81 (t,  $J = 7.1$  Hz, 2H), 1.44 (t,  $J = 7.1$  Hz, 3H), 1.36 (p,  $J = 7.2$  Hz, 2H), 1.18 (h,  $J = 7.4$  Hz, 2H), 0.77 (t,  $J = 7.4$  Hz, 3H).

$^{13}\text{C NMR}$  (151 MHz,  $\text{CDCl}_3$ )  $\delta$  163.50, 148.30, 136.41, 129.91, 129.52, 125.81, 121.43, 60.79, 44.68, 32.29, 19.62, 14.61, 13.60.

HRMS (ESI):  $[\text{M}+\text{H}]^+$  calcd for  $\text{C}_{15}\text{H}_{21}\text{N}_4\text{O}_2^+$ , 289.1660; found, 289.1665

**ethyl 5-(cyclohexylamino)-1-phenyl-1H-1,2,3-triazole-4-carboxylate (3j)**

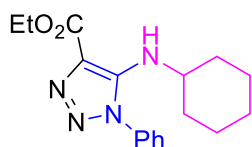

**3j**

White solid; yield 77% (73 mg); mp 155–156 °C;

$^1\text{H NMR}$  (500 MHz,  $\text{CDCl}_3$ )  $\delta$  7.57 – 7.49 (m, 5H), 5.98 (d,  $J = 10.1$  Hz, 1H), 4.44 (q,  $J = 7.1$  Hz, 2H), 2.87 – 2.77 (m, 1H), 1.66 (dd,  $J = 8.9, 3.7$  Hz, 2H), 1.57 (dt,  $J = 13.3, 3.9$  Hz, 2H), 1.45 (t,  $J = 7.1$  Hz, 3H), 1.43 – 1.38 (m, 1H), 1.18 – 1.08 (m, 3H), 0.92 (m, 2H).

$^{13}\text{C NMR}$  (126 MHz,  $\text{CDCl}_3$ )  $\delta$  163.31, 147.37, 136.42, 129.83, 129.48, 125.37, 122.11, 60.68, 52.70, 33.51, 25.19, 24.15, 14.52.

HRMS (ESI):  $[\text{M}+\text{H}]^+$  calcd for  $\text{C}_{17}\text{H}_{23}\text{N}_4\text{O}_2^+$ , 315.1816; found, 315.1817

**ethyl 5-(isopropylamino)-1-phenyl-1H-1,2,3-triazole-4-carboxylate (3k)**

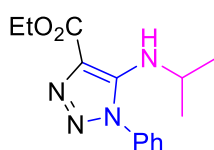

**3k**

White solid; yield 71% (58 mg); mp 126–127 °C;

$^1\text{H NMR}$  (500 MHz,  $\text{CDCl}_3$ )  $\delta$  7.54 (ddd,  $J = 17.8, 10.5, 7.4$  Hz, 5H), 5.77 (d,  $J = 10.5$  Hz, 1H), 4.44 (q,  $J = 7.1$  Hz, 2H), 3.26 – 3.14 (m, 1H), 1.45 (t,  $J = 7.1$  Hz, 3H), 1.01 (d,  $J = 6.4$  Hz, 6H).

$^{13}\text{C NMR}$  (126 MHz,  $\text{CDCl}_3$ )  $\delta$  163.35, 147.55, 136.46, 129.81, 129.63, 125.07, 122.60, 60.79, 46.40, 23.49, 14.55.

HRMS (ESI):  $[\text{M}+\text{H}]^+$  calcd for  $\text{C}_{15}\text{H}_{22}\text{N}_4\text{O}_2^+$ , 275.1503; found, 275.1507

**ethyl 5-(benzylamino)-1-phenyl-1H-1,2,3-triazole-4-carboxylate (3l)**



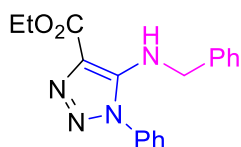

**31**

Colorless liquid; yield 81% (78 mg);

$^1\text{H NMR}$  (400 MHz,  $\text{CDCl}_3$ )  $\delta$  7.53 – 7.46 (m, 3H), 7.46 – 7.40 (m, 2H), 7.22 (dd,  $J = 5.0, 1.8$  Hz, 3H), 6.95 (dd,  $J = 6.5, 3.1$  Hz, 2H), 6.56 (t,  $J = 6.7$  Hz, 1H), 4.44 (q,  $J = 7.1$  Hz, 2H), 4.05 (d,  $J = 6.8$  Hz, 2H), 1.43 (d,  $J = 14.3$  Hz, 3H).

$^{13}\text{C NMR}$  (101 MHz,  $\text{CDCl}_3$ )  $\delta$  163.40, 147.68, 137.40, 136.09, 130.00, 129.48, 128.82, 127.87, 127.00, 125.91, 122.02, 60.89, 48.67, 14.56.

HRMS (ESI):  $[\text{M}+\text{H}]^+$  calcd for  $\text{C}_{18}\text{H}_{19}\text{N}_4\text{O}_2^+$ , 323.1503; found, 323.1502

**ethyl 5-(ethylamino)-1-(p-tolyl)-1H-1,2,3-triazole-4-carboxylate (3m)**

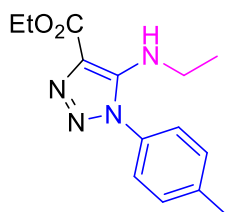

**3m**

White solid; yield 74% (61 mg); mp 97–98 °C;

$^1\text{H NMR}$  (400 MHz,  $\text{CDCl}_3$ )  $\delta$  7.44 – 7.38 (m, 2H), 7.31 (d,  $J = 8.6$  Hz, 2H), 5.96 (t,  $J = 5.8$  Hz, 1H), 4.43 (q,  $J = 7.0$  Hz, 2H), 2.86 (p,  $J = 6.6$  Hz, 2H), 2.44 (s, 3H), 1.44 (t,  $J = 7.1$  Hz, 3H), 1.09 – 1.01 (m, 3H).

$^{13}\text{C NMR}$  (101 MHz,  $\text{CDCl}_3$ )  $\delta$  163.54, 148.10, 140.19, 133.86, 130.08, 125.65, 121.39, 60.77, 39.82, 21.43, 15.70, 14.62.

HRMS (ESI):  $[\text{M}+\text{Na}]^+$  calcd for  $\text{C}_{14}\text{H}_{18}\text{N}_4\text{O}_2\text{Na}^+$ , 297.1322; found, 297.1322

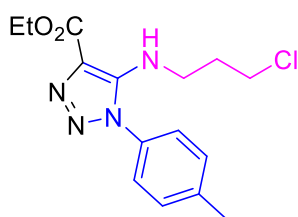

**3n**

Colorless liquid; yield 74% (61 mg);

$^1\text{H NMR}$  (400 MHz,  $\text{CDCl}_3$ )  $\delta$  7.46 – 7.38 (m, 2H), 7.33 (d,  $J = 8.2$  Hz, 2H), 6.06 (t,  $J = 6.4$  Hz, 1H), 4.43 (q,  $J = 7.1$  Hz, 2H), 3.44 (t,  $J = 6.2$  Hz, 2H), 3.05 (q,  $J = 6.6$  Hz, 2H), 2.44 (s, 3H), 1.81 (p,  $J = 6.5$  Hz, 2H), 1.44 (t,  $J = 7.1$  Hz, 3H).

$^{13}\text{C NMR}$  (101 MHz,  $\text{CDCl}_3$ )  $\delta$  163.43, 147.83, 140.38, 133.53, 130.22, 125.47, 121.78, 77.48, 77.16, 76.84, 60.85, 41.73, 41.45, 32.67, 21.38, 14.55.

HRMS (ESI):  $[\text{M}+\text{H}]^+$  calcd for  $\text{C}_{15}\text{H}_{20}\text{N}_4\text{O}_2\text{Cl}^+$ , 323.1269; found, 323.1270

**ethyl 5-(allylamino)-1-(p-tolyl)-1H-1,2,3-triazole-4-carboxylate (3o)**

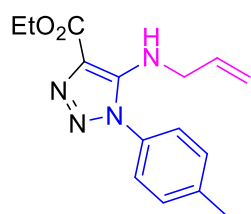

**3o**

Colorless liquid; yield 77% (66 mg);

$^1\text{H NMR}$  (400 MHz,  $\text{CDCl}_3$ )  $\delta$  7.43 – 7.37 (m, 2H), 7.31 (d,  $J = 8.0$  Hz, 2H), 6.19 (t,  $J = 5.9$  Hz, 1H), 5.70 – 5.58 (m, 1H), 5.11 – 4.99 (m, 2H), 4.44 (q,  $J = 7.1$  Hz, 2H), 3.51 – 3.43 (m, 2H), 2.44 (s, 3H), 1.44 (t,  $J = 7.1$  Hz, 3H).

$^{13}\text{C NMR}$  (101 MHz,  $\text{CDCl}_3$ )  $\delta$  163.37, 147.72, 140.23, 133.86, 133.64, 130.06, 125.50, 121.75, 117.02, 60.76, 46.80, 21.36, 14.54.

HRMS (ESI):  $[\text{M}+\text{H}]^+$  calcd for  $\text{C}_{15}\text{H}_{19}\text{N}_4\text{O}_2^+$ , 287.1503; found, 287.1503

**ethyl 5-(prop-2-yn-1-ylamino)-1-(p-tolyl)-1H-1,2,3-triazole-4-carboxylate (3p)**

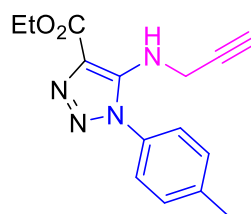

**3p**

Colorless liquid; yield 43% (37 mg);

$^1\text{H NMR}$  (400 MHz,  $\text{CDCl}_3$ )  $\delta$  7.47 – 7.41 (m, 2H), 7.34 (d,  $J = 8.0$  Hz, 2H), 6.16 (t,  $J = 6.9$  Hz, 1H), 4.45 (q,  $J = 7.1$  Hz, 2H), 3.63 (dd,  $J = 7.1, 2.5$  Hz, 2H), 2.45 (s, 3H), 2.18 (t,  $J = 2.5$  Hz, 1H), 1.45 (t,  $J = 7.1$  Hz, 3H).

$^{13}\text{C NMR}$  (101 MHz,  $\text{CDCl}_3$ )  $\delta$  163.19, 146.97, 140.62, 133.17, 130.33, 125.48, 123.33, 79.15, 73.15, 61.04, 34.43, 21.45, 14.55.

HRMS (ESI):  $[\text{M}+\text{H}]^+$  calcd for  $\text{C}_{15}\text{H}_{17}\text{N}_4\text{O}_2^+$ , 285.1346; found, 285.1347

**ethyl 5-(butylamino)-1-(4-methoxyphenyl)-1H-1,2,3-triazole-4-carboxylate (3q)**

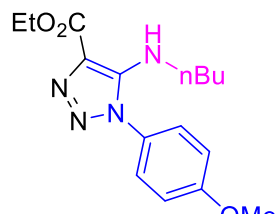

**3q**

Colorless liquid; yield 81% (77 mg);

$^1\text{H NMR}$  (400 MHz,  $\text{CDCl}_3$ )  $\delta$  7.46 – 7.39 (m, 2H), 7.04 – 6.98 (m, 2H), 6.05 (t,  $J = 6.0$  Hz, 1H), 4.43 (q,  $J = 7.1$  Hz, 2H), 3.88 (s, 3H), 2.81 (q,  $J = 6.9$  Hz, 2H), 1.44 (t,  $J = 7.1$  Hz, 3H), 1.39 – 1.32 (m, 2H), 1.25 – 1.16 (m, 2H), 0.79 (t,  $J = 7.3$  Hz, 3H).

$^{13}\text{C NMR}$  (101 MHz,  $\text{CDCl}_3$ )  $\delta$  163.50, 160.62, 148.31, 129.14, 127.37, 121.18, 114.59, 60.72, 55.74,

44.36, 32.33, 19.65, 14.60, 13.64.

HRMS (ESI):  $[M+H]^+$  calcd for  $C_{16}H_{23}N_4O_3^+$ , 319.1770; found, 319.1771

**ethyl 5-(butylamino)-1-(4-fluorophenyl)-1H-1,2,3-triazole-4-carboxylate (3r)**

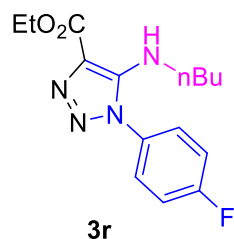

Colorless liquid; yield 51% (47 mg);

$^1H$  NMR (400 MHz,  $CDCl_3$ )  $\delta$  7.58 – 7.49 (m, 2H), 7.26 – 7.19 (m, 2H), 6.09 (t,  $J = 5.8$  Hz, 1H), 4.44 (q,  $J = 7.1$  Hz, 2H), 2.80 (q,  $J = 6.8$  Hz, 2H), 1.44 (t,  $J = 7.1$  Hz, 3H), 1.42 – 1.33 (m, 2H), 1.21 (dq,  $J = 14.4, 7.3$  Hz, 2H), 0.80 (t,  $J = 7.3$  Hz, 3H).

$^{13}C$  NMR (101 MHz,  $CDCl_3$ )  $\delta$  163.45, 163.15 (d,  $J = 251.0$  Hz), 148.40, 132.51 (d,  $J = 3.3$  Hz), 127.84 (d,  $J = 9.0$  Hz), 121.50, 116.65 (d,  $J = 23.1$  Hz), 60.89, 44.77, 32.31, 19.68, 14.62, 13.65.

HRMS (ESI):  $[M+Na]^+$  calcd for  $C_{15}H_{19}FN_4O_2Na^+$ , 329.1384; found, 329.1385

**ethyl 1-(4-bromophenyl)-5-(butylamino)-1H-1,2,3-triazole-4-carboxylate (3s)**

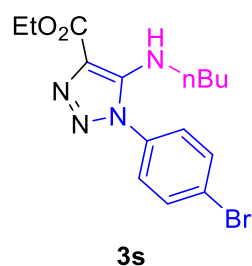

Colorless liquid; yield 65% (71 mg);

$^1H$  NMR (400 MHz,  $CDCl_3$ )  $\delta$  7.70 – 7.62 (m, 2H), 7.46 – 7.39 (m, 2H), 6.06 (t,  $J = 5.7$  Hz, 1H), 4.41 (q,  $J = 7.1$  Hz, 2H), 2.81 (q,  $J = 6.7$  Hz, 2H), 1.40 (dt,  $J = 19.4, 7.5$  Hz, 5H), 1.20 (dq,  $J = 14.4, 7.2, 6.7$  Hz, 2H), 0.79 (t,  $J = 7.3$  Hz, 3H).

$^{13}C$  NMR (101 MHz,  $CDCl_3$ )  $\delta$  163.38, 148.34, 135.41, 132.79, 123.87, 121.72, 60.92, 32.30, 19.67, 14.60, 13.66.

HRMS (ESI):  $[M+Na]^+$  calcd for  $C_{15}H_{19}BrN_4O_2Na^+$ , 389.0584; found, 389.0582

**phenyl(1-phenyl-5-(phenylamino)-1H-1,2,3-triazol-4-yl)methanone (3t)**

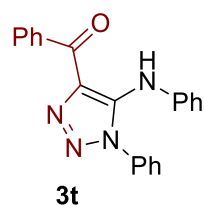

White solid; yield 87% (86 mg); mp 134–135 °C;

$^1H$  NMR (500 MHz,  $CDCl_3$ )  $\delta$  9.38 (s, 1H), 8.60 – 8.53 (m, 2H), 7.61 (t,  $J = 7.3$  Hz, 1H), 7.55 (t,  $J = 7.5$  Hz, 2H), 7.37 – 7.31 (m, 2H), 7.21 (dd,  $J = 4.4, 2.3$  Hz, 3H), 6.99 (t,  $J = 7.7$  Hz, 2H), 6.89 (t,  $J =$

7.3 Hz, 1H), 6.76 (d,  $J = 7.9$  Hz, 2H).

$^{13}\text{C}$  NMR (126 MHz,  $\text{CDCl}_3$ )  $\delta$  187.03, 144.82, 137.43, 137.14, 135.96, 132.95, 131.63, 130.52, 128.98, 128.88, 128.82, 128.46, 124.71, 123.80, 121.88.

HRMS (ESI):  $[\text{M}+\text{H}]^+$  calcd for  $\text{C}_{21}\text{H}_{17}\text{N}_4\text{O}^+$ , 341.1397; found, 341.1399

### 1-(1-phenyl-5-(phenylamino)-1H-1,2,3-triazol-4-yl)ethan-1-one (3u)<sup>[3]</sup>

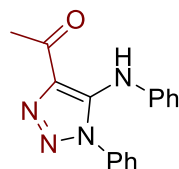

**3u**

White solid; yield 67% (56 mg); mp 114–115 °C;

$^1\text{H}$  NMR (500 MHz,  $\text{CDCl}_3$ )  $\delta$  8.77 (s, 1H), 7.28 (dd,  $J = 6.7, 3.0$  Hz, 2H), 7.24 – 7.17 (m, 3H), 6.98 (t,  $J = 7.6$  Hz, 2H), 6.89 (d,  $J = 7.4$  Hz, 1H), 6.71 (d,  $J = 7.8$  Hz, 2H), 2.73 (s, 3H).

$^{13}\text{C}$  NMR (126 MHz,  $\text{CDCl}_3$ )  $\delta$  194.59, 142.51, 137.33, 135.90, 132.10, 128.96, 128.88, 128.81, 124.79, 123.73, 121.91, 26.63.

### (1-phenyl-5-(phenylamino)-1H-1,2,3-triazol-4-yl)(pyrrolidin-1-yl)methanone (3v)

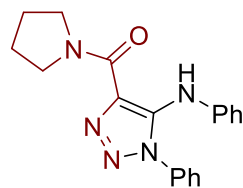

**3v**

White solid; yield 69% (69 mg); mp 132–133 °C;

$^1\text{H}$  NMR (500 MHz,  $\text{CDCl}_3$ )  $\delta$  9.00 (s, 1H), 7.51 – 7.42 (m, 2H), 7.27 – 7.20 (m, 3H), 6.96 (t,  $J = 7.9$  Hz, 2H), 6.80 (t,  $J = 7.4$  Hz, 1H), 6.65 (d,  $J = 7.9$  Hz, 2H), 4.24 (t,  $J = 6.8$  Hz, 2H), 3.68 (t,  $J = 6.9$  Hz, 2H), 2.06 (p,  $J = 6.7$  Hz, 2H), 1.94 (p,  $J = 6.8$  Hz, 2H).

$^{13}\text{C}$  NMR (126 MHz,  $\text{CDCl}_3$ )  $\delta$  161.86, 143.08, 139.25, 136.46, 129.06, 128.75, 128.64, 128.04, 123.30, 123.09, 120.08, 49.08, 46.77, 26.73, 23.93.

HRMS (ESI):  $[\text{M}+\text{H}]^+$  calcd for  $\text{C}_{19}\text{H}_{20}\text{N}_5\text{O}^+$ , 334.1662; found, 334.1664

### morpholino(1-phenyl-5-(phenylamino)-1H-1,2,3-triazol-4-yl)methanone (3w)

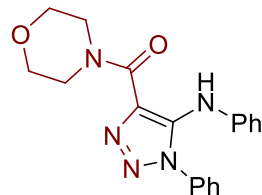

**3w**

White solid; yield 82% (86 mg); mp 158–159 °C;

$^1\text{H}$  NMR (500 MHz,  $\text{CDCl}_3$ )  $\delta$  8.80 (s, 1H), 7.48 – 7.40 (m, 2H), 7.27 – 7.20 (m, 3H), 6.97 (td,  $J = 8.9, 8.3, 1.9$  Hz, 2H), 6.81 (t,  $J = 7.4$  Hz, 1H), 6.72 – 6.62 (m, 2H), 4.60 (s, 2H), 3.91 – 3.72 (m, 6H).

$^{13}\text{C}$  NMR (126 MHz,  $\text{CDCl}_3$ )  $\delta$  161.77, 143.50, 139.03, 136.23, 129.05, 128.77, 127.43, 123.39, 123.16,

120.01, 67.33, 67.07, 47.56, 42.76.

HRMS (ESI):  $[M+H]^+$  calcd for  $C_{19}H_{20}N_5O_2^+$ , 350.1612; found, 350.1612

**N,N-dibenzyl-1-phenyl-5-(phenylamino)-1H-1,2,3-triazole-4-carboxamide (3x)**

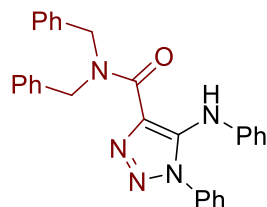

**3x**

White solid; yield 79% (109 mg); mp 146–147 °C;

$^1H$  NMR (500 MHz,  $CDCl_3$ )  $\delta$  9.10 (s, 1H), 7.44 (t,  $J$  = 8.6 Hz, 2H), 7.39 – 7.21 (m, 13H), 7.04 – 6.94 (m, 2H), 6.84 (q,  $J$  = 6.8 Hz, 1H), 6.71 (t,  $J$  = 8.9 Hz, 2H), 5.53 (s, 2H), 4.71 (s, 2H).

$^{13}C$  NMR (126 MHz,  $CDCl_3$ )  $\delta$  163.58, 143.87, 139.14, 139.10, 137.51, 137.14, 136.39, 129.08, 129.06, 128.84, 128.82, 128.75, 128.25, 127.96, 127.58, 127.39, 123.49, 123.25, 120.34, 51.18, 48.27.

HRMS (ESI):  $[M+H]^+$  calcd for  $C_{29}H_{26}N_5O^+$ , 460.2132; found, 460.2130

**dimethyl (1-phenyl-5-(phenylamino)-1H-1,2,3-triazol-4-yl)phosphonate (3y)**

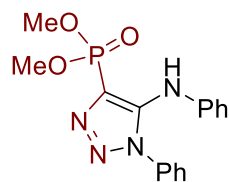

**3y**

White solid; yield 59% (61 mg); mp 162–164 °C;

$^1H$  NMR (500 MHz,  $CDCl_3$ )  $\delta$  7.66 (s, 1H), 7.45 (d,  $J$  = 7.2 Hz, 2H), 7.26 (q,  $J$  = 7.3, 6.3 Hz, 3H), 7.00 (t,  $J$  = 7.8 Hz, 2H), 6.84 (t,  $J$  = 7.3 Hz, 1H), 6.66 (d,  $J$  = 7.9 Hz, 2H), 3.88 (d,  $J$  = 11.5 Hz, 6H).

$^{13}C$  NMR (126 MHz,  $CDCl_3$ )  $\delta$  146.46, 146.20, 139.43, 136.01, 129.15, 128.97, 128.94, 123.65, 123.32, 121.57, 120.00, 119.66, 53.73, 53.68.

HRMS (ESI):  $[M+H]^+$  calcd for  $C_{16}H_{18}N_4O_3P^+$ , 345.1111; found, 345.1116

**ethyl 5-(methyl(phenyl)amino)-1-phenyl-1H-1,2,3-triazole-4-carboxylate (4a)**

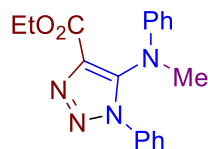

**4a**

White solid; yield 79% (76 mg); mp 137–138 °C;

$^1H$  NMR (500 MHz,  $CDCl_3$ )  $\delta$  7.55 – 7.49 (m, 2H), 7.43 (dd,  $J$  = 5.1, 2.0 Hz, 3H), 7.19 (dd,  $J$  = 8.9, 7.3 Hz, 2H), 6.85 (t,  $J$  = 7.4 Hz, 1H), 6.62 (dd,  $J$  = 8.9, 1.1 Hz, 2H), 4.27 (q,  $J$  = 7.2 Hz, 2H), 3.17 (s, 3H), 1.20 (t,  $J$  = 7.2 Hz, 3H).

$^{13}C$  NMR (126 MHz,  $CDCl_3$ )  $\delta$  160.14, 146.45, 144.29, 135.26, 132.96, 129.84, 129.68, 129.37, 123.64,

120.36, 114.12, 61.2SS1, 38.53, 14.18.

HRMS (ESI):  $[M+H]^+$  calcd for  $C_{18}H_{19}N_4O_2^+$ , 323.1503; found, 323.1510

**ethyl 5-(butyl(phenyl)amino)-1-phenyl-1H-1,2,3-triazole-4-carboxylate (4b)**

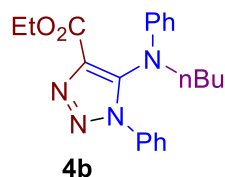

White solid; yield 63% (69 mg); mp 113–115 °C;

$^1H$  NMR (500 MHz,  $CDCl_3$ )  $\delta$  7.53 – 7.48 (m, 2H), 7.45 (dd,  $J = 5.2, 2.1$  Hz, 3H), 7.23 (dd,  $J = 8.9, 7.3$  Hz, 2H), 6.92 – 6.86 (m, 1H), 6.70 – 6.64 (m, 2H), 4.25 (q,  $J = 7.1$  Hz, 2H), 3.42 – 3.35 (m, 2H), 1.46 – 1.36 (m, 2H), 1.16 (h,  $J = 7.1$  Hz, 5H), 0.79 (t,  $J = 7.4$  Hz, 3H).

$^{13}C$  NMR (126 MHz,  $CDCl_3$ )  $\delta$  160.13, 146.73, 143.48, 135.39, 133.61, 129.92, 129.69, 129.51, 124.02, 120.32, 114.68, 61.15, 51.59, 29.79, 20.15, 14.12, 13.82.

HRMS (ESI):  $[M+H]^+$  calcd for  $C_{21}H_{25}N_4O_2^+$ , 365.1972; found, 365.1979

**ethyl 5-(allyl(phenyl)amino)-1-phenyl-1H-1,2,3-triazole-4-carboxylate (4c)**

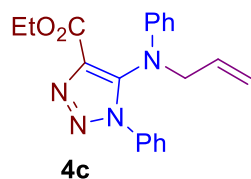

White solid; yield 65% (68 mg); mp 111–112 °C;

$^1H$  NMR (500 MHz,  $CDCl_3$ )  $\delta$  7.52 – 7.42 (m, 5H), 7.22 (dd,  $J = 8.9, 7.3$  Hz, 2H), 6.89 (t,  $J = 7.4$  Hz, 1H), 6.69 (d,  $J = 7.8$  Hz, 2H), 5.74 – 5.62 (m, 1H), 5.15 – 5.03 (m, 2H), 4.27 (q,  $J = 7.1$  Hz, 2H), 4.07 (d,  $J = 5.9$  Hz, 2H), 1.19 (t,  $J = 7.1$  Hz, 3H).

$^{13}C$  NMR (126 MHz,  $CDCl_3$ )  $\delta$  160.14, 146.56, 143.45, 135.30, 133.52, 132.88, 129.99, 129.65, 129.41, 124.28, 120.71, 118.68, 115.12, 61.21, 54.64, 14.16.

HRMS (ESI):  $[M+Na]^+$  calcd for  $C_{20}H_{20}N_4O_2Na^+$ , 371.1478; found, 371.1477

**ethyl 5-(benzyl(phenyl)amino)-1-phenyl-1H-1,2,3-triazole-4-carboxylate (4d)**

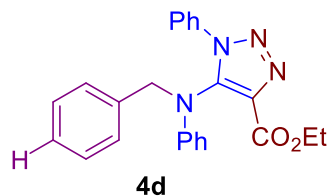

White solid; yield 77% (92 mg); mp 121–123 °C;

$^1H$  NMR (400 MHz,  $CDCl_3$ )  $\delta$  7.48 – 7.43 (m, 1H), 7.39 (dd,  $J = 8.3, 6.7$  Hz, 2H), 7.32 – 7.27 (m, 2H), 7.23 (dd,  $J = 8.7, 7.4$  Hz, 2H), 7.17 – 7.07 (m, 3H), 6.93 (dd,  $J = 14.1, 7.0$  Hz, 3H), 6.74 (dd,  $J = 8.7, 0.9$  Hz, 2H), 4.66 (s, 2H), 4.31 (q,  $J = 7.1$  Hz, 2H), 1.21 (t,  $J = 7.1$  Hz, 3H).

$^{13}C$  NMR (101 MHz,  $CDCl_3$ )  $\delta$  160.21, 147.32, 143.75, 136.00, 135.20, 133.70, 129.93, 129.49, 129.48, 128.52, 127.85, 127.66, 124.54, 120.94, 115.34, 61.30, 56.06, 14.18.

HRMS (ESI):  $[M+H]^+$  calcd for  $C_{24}H_{23}N_4O_2^+$ , 399.1816; found, 399.1813

**ethyl 5-((4-methylbenzyl)(phenyl)amino)-1-phenyl-1H-1,2,3-triazole-4-carboxylate (4e)**

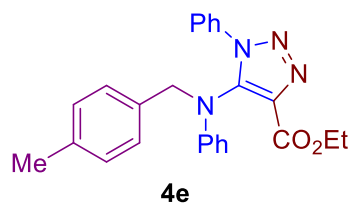

White solid; yield 71% (88 mg); mp 115–116 °C;

<sup>1</sup>H NMR (500 MHz, CDCl<sub>3</sub>) δ 7.45 (t, *J* = 7.4 Hz, 1H), 7.38 (t, *J* = 7.6 Hz, 2H), 7.29 (d, *J* = 7.7 Hz, 2H), 7.23 (t, *J* = 8.0 Hz, 2H), 6.91 (dd, *J* = 14.1, 7.5 Hz, 3H), 6.82 (d, *J* = 7.9 Hz, 2H), 6.74 (d, *J* = 8.1 Hz, 2H), 4.62 (s, 2H), 4.30 (q, *J* = 7.1 Hz, 2H), 2.25 (s, 3H), 1.21 (t, *J* = 7.1 Hz, 3H).

<sup>13</sup>C NMR (126 MHz, CDCl<sub>3</sub>) δ 160.24, 147.41, 143.74, 137.39, 135.27, 133.77, 132.85, 129.87, 129.47, 129.43, 129.19, 127.93, 124.51, 120.87, 115.37, 61.28, 55.73, 21.15, 14.20.

HRMS (ESI): [M+H]<sup>+</sup> calcd for C<sub>25</sub>H<sub>25</sub>N<sub>4</sub>O<sub>2</sub><sup>+</sup>, 413.1972; found, 413.1974

**ethyl 5-((4-bromobenzyl)(phenyl)amino)-1-phenyl-1H-1,2,3-triazole-4-carboxylate (4f)**

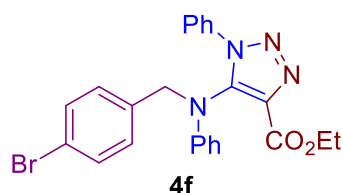

White solid; yield 65% (93 mg); mp 155–157 °C;

<sup>1</sup>H NMR (500 MHz, CDCl<sub>3</sub>) δ 7.42 – 7.38 (m, 1H), 7.34 (dd, *J* = 8.4, 6.8 Hz, 2H), 7.25 – 7.21 (m, 2H), 7.19 – 7.12 (m, 4H), 6.87 (t, *J* = 7.4 Hz, 1H), 6.75 (d, *J* = 8.4 Hz, 2H), 6.62 (d, *J* = 7.9 Hz, 2H), 4.54 (s, 2H), 4.25 (q, *J* = 7.1 Hz, 2H), 1.16 (t, *J* = 7.1 Hz, 3H).

<sup>13</sup>C NMR (126 MHz, CDCl<sub>3</sub>) δ 160.20, 147.05, 143.79, 135.17, 135.13, 133.67, 131.63, 130.11, 129.59, 129.45, 124.60, 121.64, 121.19, 115.33, 61.43, 55.62, 14.23.

HRMS (ESI): [M+Na]<sup>+</sup> calcd for C<sub>24</sub>H<sub>21</sub>BrN<sub>4</sub>O<sub>2</sub>Na<sup>+</sup>, 479.0906; found, 479.0915

**ethyl 5-((4-fluorobenzyl)(phenyl)amino)-1-phenyl-1H-1,2,3-triazole-4-carboxylate (4g)**

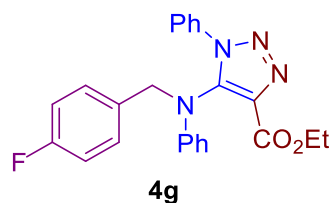

White solid; yield 69% (86 mg); mp 121–123 °C;

<sup>1</sup>H NMR (500 MHz, CDCl<sub>3</sub>) δ 7.46 (t, *J* = 7.3 Hz, 1H), 7.40 (t, *J* = 7.6 Hz, 2H), 7.29 (d, *J* = 7.7 Hz, 2H), 7.24 (t, *J* = 8.1 Hz, 2H), 6.99 – 6.88 (m, 3H), 6.80 – 6.69 (m, 4H), 4.64 (s, 2H), 4.32 (q, *J* = 7.1 Hz, 2H), 1.23 (t, *J* = 7.1 Hz, 3H).

<sup>13</sup>C NMR (126 MHz, CDCl<sub>3</sub>) δ 162.25 (d, *J* = 246.4 Hz), 160.23, 147.17, 143.70, 135.18, 133.80, 131.69 (d, *J* = 3.3 Hz), 130.02, 129.64 (d, *J* = 8.3 Hz), 129.58, 129.55, 124.51, 121.11, 115.41 (d, *J* = 21.0 Hz), 115.33, 61.39, 55.30, 14.23.

HRMS (ESI): [M+H]<sup>+</sup> calcd for C<sub>24</sub>H<sub>22</sub>FN<sub>4</sub>O<sub>2</sub><sup>+</sup>, 417.1721; found, 417.1725

**ethyl 1-phenyl-5-(N-phenylbenzamido)-1H-1,2,3-triazole-4-carboxylate (4h)**

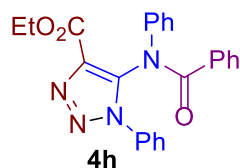

White solid; yield 88% (61 mg); mp 119–120 °C;

<sup>1</sup>H NMR (400 MHz, DMSO-*d*<sub>6</sub>) δ 7.61 – 7.49 (m, 3H), 7.46 – 7.28 (m, 7H), 7.11 (s, 3H), 6.79 (s, 2H), 4.30 (d, *J* = 5.3 Hz, 2H), 1.20 (t, *J* = 7.1 Hz, 3H).

<sup>13</sup>C NMR (101 MHz, DMSO-*d*<sub>6</sub>) δ 159.22, 139.97, 139.75, 133.74, 133.19, 131.53, 130.67, 129.84, 129.02, 128.59, 128.18, 127.00, 125.88, 124.59, 61.01, 14.02.

HRMS (ESI): [M+Na]<sup>+</sup> calcd for C<sub>24</sub>H<sub>20</sub>N<sub>4</sub>O<sub>3</sub>Na<sup>+</sup>, 435.1428; found, 435.1426

**ethyl 5-((2-ethoxy-2-oxoethyl)(phenyl)amino)-1-phenyl-1H-1,2,3-triazole-4-carboxylate (4i)**

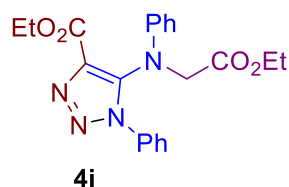

White solid; yield 57% (67 mg); mp 118–119 °C;

<sup>1</sup>H NMR (500 MHz, CDCl<sub>3</sub>) δ 7.70 – 7.61 (m, 2H), 7.33 (dd, *J* = 5.2, 2.2 Hz, 3H), 7.10 (dd, *J* = 8.7, 7.3 Hz, 2H), 6.85 (t, *J* = 7.4 Hz, 1H), 6.62 – 6.55 (m, 2H), 4.55 (s, 2H), 4.38 (q, *J* = 7.1 Hz, 2H), 4.16 (q, *J* = 7.2 Hz, 2H), 1.33 (t, *J* = 7.2 Hz, 3H), 1.23 (t, *J* = 7.2 Hz, 3H).

<sup>13</sup>C NMR (126 MHz, CDCl<sub>3</sub>) δ 170.02, 160.71, 145.69, 143.75, 135.62, 131.64, 129.55, 129.28, 129.16, 124.60, 122.22, 116.99, 61.57, 61.41, 54.98, 14.30, 14.21.

HRMS (ESI): [M+Na]<sup>+</sup> calcd for C<sub>21</sub>H<sub>22</sub>N<sub>4</sub>O<sub>4</sub>Na<sup>+</sup>, 417.1533; found, 417.1531

**ethyl 1-phenyl-5-(phenyl(prop-2-yn-1-yl)amino)-1H-1,2,3-triazole-4-carboxylate (4j)**

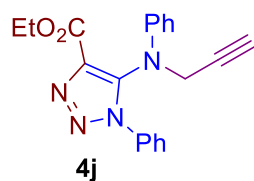

White solid; yield 56% (58 mg); mp 142–144 °C;

<sup>1</sup>H NMR (500 MHz, CDCl<sub>3</sub>) δ 7.59 (dd, *J* = 6.6, 3.1 Hz, 2H), 7.41 – 7.35 (m, 3H), 7.15 (dd, *J* = 8.8, 7.4 Hz, 2H), 6.89 – 6.83 (m, 1H), 6.72 – 6.66 (m, 2H), 4.47 (d, *J* = 2.6 Hz, 2H), 4.34 (q, *J* = 7.2 Hz, 2H), 2.31 (t, *J* = 2.5 Hz, 1H), 1.27 (t, *J* = 7.2 Hz, 3H).

<sup>13</sup>C NMR (126 MHz, CDCl<sub>3</sub>) δ 160.43, 145.23, 142.90, 135.21, 133.16, 129.86, 129.41, 129.38, 124.35, 121.47, 115.58, 78.48, 74.44, 61.41, 41.96, 14.28.

HRMS (ESI): [M+H]<sup>+</sup> calcd for C<sub>20</sub>H<sub>19</sub>N<sub>4</sub>O<sub>2</sub><sup>+</sup>, 347.1508; found, 347.1511

**ethyl 1-benzyl-5-(phenylamino)-1H-1,2,3-triazole-4-carboxylate (5i)**



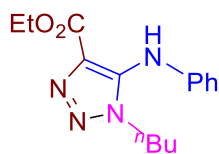

**5i**

Colorless liquid; yield 87% (50 mg);

$^1\text{H NMR}$  (400 MHz,  $\text{CDCl}_3$ )  $\delta$  7.37 – 7.31 (m, 2H), 7.25 (s, 1H), 7.14 (t,  $J = 7.4$  Hz, 1H), 6.93 (d,  $J = 8.0$  Hz, 2H), 4.42 (q,  $J = 7.1$  Hz, 2H), 4.00 – 3.94 (m, 2H), 1.73 – 1.65 (m, 2H), 1.42 (t,  $J = 7.1$  Hz, 3H), 1.14 (dq,  $J = 14.7, 7.4$  Hz, 2H), 0.78 (t,  $J = 7.4$  Hz, 3H).

$^{13}\text{C NMR}$  (101 MHz,  $\text{CDCl}_3$ )  $\delta$  162.91, 143.30, 140.29, 129.76, 126.13, 124.67, 120.82, 61.13, 48.75, 30.52, 19.58, 14.50, 13.39.

HRMS (ESI):  $[\text{M}+\text{H}]^+$  calcd for  $\text{C}_{15}\text{H}_{21}\text{N}_4\text{O}_2^+$ , 289.1660; found, 289.1664

### ethyl 1-butyl-5-(phenylamino)-1H-1,2,3-triazole-4-carboxylate (5l)

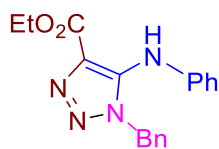

**5l**

Colorless liquid; yield 81% (52 mg);

$^1\text{H NMR}$  (400 MHz,  $\text{CDCl}_3$ )  $\delta$  7.30 (t,  $J = 7.8$  Hz, 2H), 7.26 – 7.12 (m, 5H), 6.89 – 6.78 (m, 4H), 5.21 (s, 2H), 4.41 (q,  $J = 7.1$  Hz, 2H), 1.41 (t,  $J = 7.1$  Hz, 3H).

$^{13}\text{C NMR}$  (101 MHz,  $\text{CDCl}_3$ )  $\delta$  162.85, 143.35, 139.61, 133.97, 129.69, 128.71, 128.35, 127.67, 125.95, 124.94, 121.52, 61.17, 52.64, 14.51.

HRMS (ESI):  $[\text{M}+\text{H}]^+$  calcd for  $\text{C}_{18}\text{H}_{19}\text{N}_4\text{O}_2^+$ , 323.1508; found, 323.1516

### 3-phenyl-3,4-dihydro-9H-[1,2,3]triazolo[4,5-b]quinolin-9-one (7)

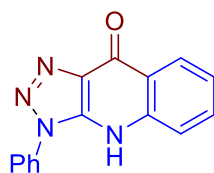

**7**

White solid; yield 59% (31 mg);  $>263$  °C (decomposition);

$^1\text{H NMR}$  (400 MHz,  $\text{DMSO}-d_6$ )  $\delta$  12.34 (s, 1H), 8.34 – 8.30 (m, 1H), 7.85 – 7.80 (m, 2H), 7.76 – 7.71 (m, 4H), 7.70 – 7.65 (m, 1H), 7.36 (ddd,  $J = 8.1, 5.5, 2.6$  Hz, 1H).

$^{13}\text{C NMR}$  (101 MHz,  $\text{DMSO}-d_6$ )  $\delta$  170.43, 140.65, 139.95, 134.45, 133.20, 130.38, 130.07, 130.03, 126.16, 125.02, 123.78, 122.41, 118.68.

HRMS (ESI):  $[\text{M}+\text{H}]^+$  calcd for  $\text{C}_{15}\text{H}_{11}\text{N}_4^+$ , 263.0927; found, 263.0930

## 10. Crystal data and structure refinement for 3x

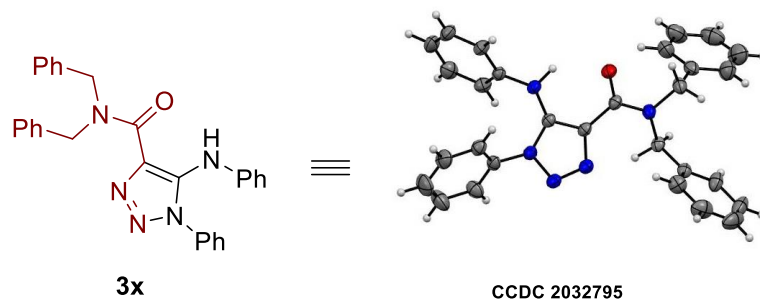

Table 1. Crystal data and structure refinement for 20200106ZH\_KHAZ0863\_0m\_a.

|                                   |                                                  |                  |
|-----------------------------------|--------------------------------------------------|------------------|
| Identification code               | 20200106ZH_KHAZ0863_0m_a                         |                  |
| Empirical formula                 | C <sub>29</sub> H <sub>25</sub> N <sub>5</sub> O |                  |
| Formula weight                    | 459.54                                           |                  |
| Temperature                       | 193(2) K                                         |                  |
| Wavelength                        | 0.71073 Å                                        |                  |
| Crystal system                    | Monoclinic                                       |                  |
| Space group                       | C2/c                                             |                  |
| Unit cell dimensions              | a = 27.8270(12) Å                                | α = 90 °         |
|                                   | b = 7.9969(4) Å                                  | β = 119.399(2) ° |
|                                   | c = 24.2837(11) Å                                | γ = 90 °         |
| Volume                            | 4707.9(4) Å <sup>3</sup>                         |                  |
| Z                                 | 8                                                |                  |
| Density (calculated)              | 1.297 Mg/m <sup>3</sup>                          |                  |
| Absorption coefficient            | 0.081 mm <sup>-1</sup>                           |                  |
| F(000)                            | 1936                                             |                  |
| Crystal size                      | 0.120 x 0.110 x 0.080 mm <sup>3</sup>            |                  |
| Theta range for data collection   | 2.682 to 28.306 °                                |                  |
| Index ranges                      | -36 ≤ h ≤ 36, -8 ≤ k ≤ 10, -32 ≤ l ≤ 32          |                  |
| Reflections collected             | 22877                                            |                  |
| Independent reflections           | 5836 [R(int) = 0.0476]                           |                  |
| Completeness to theta = 25.242 °  | 99.5 %                                           |                  |
| Refinement method                 | Full-matrix least-squares on F <sup>2</sup>      |                  |
| Data / restraints / parameters    | 5836 / 0 / 316                                   |                  |
| Goodness-of-fit on F <sup>2</sup> | 1.048                                            |                  |
| Final R indices [I > 2σ(I)]       | R1 = 0.0460, wR2 = 0.1050                        |                  |
| R indices (all data)              | R1 = 0.0686, wR2 = 0.1188                        |                  |
| Extinction coefficient            | n/a                                              |                  |
| Largest diff. peak and hole       | 0.211 and -0.208 e.Å <sup>-3</sup>               |                  |

Table 2. Atomic coordinates (x 10<sup>4</sup>) and equivalent isotropic displacement parameters (Å<sup>2</sup> × 10<sup>3</sup>)

for 20200106ZH\_KHAZ0863\_0m\_a.  $U(\text{eq})$  is defined as one third of the trace of the orthogonalized  $U^{ij}$  tensor.

|       | x       | y        | z       | U(eq) |
|-------|---------|----------|---------|-------|
| C(1)  | 7266(1) | 4007(2)  | 4311(1) | 53(1) |
| C(2)  | 7624(1) | 5006(3)  | 4211(1) | 65(1) |
| C(3)  | 7556(1) | 6699(3)  | 4169(1) | 63(1) |
| C(4)  | 7134(1) | 7420(3)  | 4228(1) | 63(1) |
| C(5)  | 6780(1) | 6431(2)  | 4334(1) | 50(1) |
| C(6)  | 6841(1) | 4708(2)  | 4374(1) | 38(1) |
| C(7)  | 6447(1) | 3623(2)  | 4476(1) | 37(1) |
| C(8)  | 5446(1) | 471(2)   | 3418(1) | 42(1) |
| C(9)  | 5454(1) | -1224(2) | 3313(1) | 58(1) |
| C(10) | 5758(1) | -1845(2) | 3051(1) | 65(1) |
| C(11) | 6059(1) | -773(2)  | 2897(1) | 58(1) |
| C(12) | 6053(1) | 926(2)   | 2999(1) | 42(1) |
| C(13) | 5748(1) | 1561(2)  | 3263(1) | 30(1) |
| C(14) | 5737(1) | 3422(2)  | 3352(1) | 29(1) |
| C(15) | 5532(1) | 4696(2)  | 4162(1) | 28(1) |
| C(16) | 4934(1) | 4817(2)  | 3723(1) | 28(1) |
| C(17) | 4576(1) | 5754(2)  | 3846(1) | 27(1) |
| C(18) | 4436(1) | 8300(2)  | 4325(1) | 28(1) |
| C(19) | 4414(1) | 8848(2)  | 4854(1) | 34(1) |
| C(20) | 4195(1) | 10410(2) | 4848(1) | 41(1) |
| C(21) | 3995(1) | 11408(2) | 4319(1) | 45(1) |
| C(22) | 4014(1) | 10854(2) | 3791(1) | 45(1) |
| C(23) | 4238(1) | 9301(2)  | 3794(1) | 37(1) |
| C(24) | 3411(1) | 5814(2)  | 3725(1) | 35(1) |
| C(25) | 2875(1) | 6155(2)  | 3588(1) | 49(1) |
| C(26) | 2474(1) | 6539(3)  | 2983(1) | 63(1) |
| C(27) | 2597(1) | 6568(3)  | 2497(1) | 60(1) |
| C(28) | 3127(1) | 6215(2)  | 2619(1) | 42(1) |
| C(29) | 3527(1) | 5861(2)  | 3231(1) | 31(1) |
| N(1)  | 5870(1) | 3895(2)  | 3996(1) | 31(1) |
| N(2)  | 4629(1) | 4003(2)  | 3161(1) | 33(1) |
| N(3)  | 4112(1) | 4369(2)  | 2928(1) | 34(1) |
| N(4)  | 4070(1) | 5445(1)  | 3348(1) | 29(1) |

|      |         |         |         |       |
|------|---------|---------|---------|-------|
| N(5) | 4687(1) | 6722(1) | 4358(1) | 32(1) |
| O(1) | 5709(1) | 5316(1) | 4697(1) | 36(1) |

---

Table 3. Bond lengths [ $\text{\AA}$ ] and angles [ $^\circ$ ] for 20200106ZH\_KHAZ0863\_0m\_a.

---

|              |            |
|--------------|------------|
| C(1)-C(6)    | 1.383(2)   |
| C(1)-C(2)    | 1.389(3)   |
| C(1)-H(1)    | 0.9500     |
| C(2)-C(3)    | 1.364(3)   |
| C(2)-H(2)    | 0.9500     |
| C(3)-C(4)    | 1.376(3)   |
| C(3)-H(3)    | 0.9500     |
| C(4)-C(5)    | 1.381(3)   |
| C(4)-H(4)    | 0.9500     |
| C(5)-C(6)    | 1.386(2)   |
| C(5)-H(5)    | 0.9500     |
| C(6)-C(7)    | 1.510(2)   |
| C(7)-N(1)    | 1.4649(17) |
| C(7)-H(7A)   | 0.9900     |
| C(7)-H(7B)   | 0.9900     |
| C(8)-C(9)    | 1.381(2)   |
| C(8)-C(13)   | 1.384(2)   |
| C(8)-H(8)    | 0.9500     |
| C(9)-C(10)   | 1.377(3)   |
| C(9)-H(9)    | 0.9500     |
| C(10)-C(11)  | 1.372(3)   |
| C(10)-H(10)  | 0.9500     |
| C(11)-C(12)  | 1.383(2)   |
| C(11)-H(11)  | 0.9500     |
| C(12)-C(13)  | 1.3871(18) |
| C(12)-H(12)  | 0.9500     |
| C(13)-C(14)  | 1.5061(19) |
| C(14)-N(1)   | 1.4682(16) |
| C(14)-H(14A) | 0.9900     |
| C(14)-H(14B) | 0.9900     |
| C(15)-O(1)   | 1.2448(16) |
| C(15)-N(1)   | 1.3533(16) |

|                |            |
|----------------|------------|
| C(15)-C(16)    | 1.4725(19) |
| C(16)-N(2)     | 1.3669(17) |
| C(16)-C(17)    | 1.3925(17) |
| C(17)-N(4)     | 1.3557(17) |
| C(17)-N(5)     | 1.3641(16) |
| C(18)-C(23)    | 1.381(2)   |
| C(18)-C(19)    | 1.3876(18) |
| C(18)-N(5)     | 1.4251(17) |
| C(19)-C(20)    | 1.387(2)   |
| C(19)-H(19)    | 0.9500     |
| C(20)-C(21)    | 1.376(2)   |
| C(20)-H(20)    | 0.9500     |
| C(21)-C(22)    | 1.382(2)   |
| C(21)-H(21)    | 0.9500     |
| C(22)-C(23)    | 1.387(2)   |
| C(22)-H(22)    | 0.9500     |
| C(23)-H(23)    | 0.9500     |
| C(24)-C(25)    | 1.385(2)   |
| C(24)-C(29)    | 1.3877(18) |
| C(24)-H(24)    | 0.9500     |
| C(25)-C(26)    | 1.375(3)   |
| C(25)-H(25)    | 0.9500     |
| C(26)-C(27)    | 1.380(3)   |
| C(26)-H(26)    | 0.9500     |
| C(27)-C(28)    | 1.383(2)   |
| C(27)-H(27)    | 0.9500     |
| C(28)-C(29)    | 1.380(2)   |
| C(28)-H(28)    | 0.9500     |
| C(29)-N(4)     | 1.4316(16) |
| N(2)-N(3)      | 1.2940(16) |
| N(3)-N(4)      | 1.3837(15) |
| N(5)-H(5A)     | 0.9495     |
|                |            |
| C(6)-C(1)-C(2) | 120.84(18) |
| C(6)-C(1)-H(1) | 119.6      |
| C(2)-C(1)-H(1) | 119.6      |
| C(3)-C(2)-C(1) | 119.85(18) |
| C(3)-C(2)-H(2) | 120.1      |

|                   |            |
|-------------------|------------|
| C(1)-C(2)-H(2)    | 120.1      |
| C(2)-C(3)-C(4)    | 120.16(19) |
| C(2)-C(3)-H(3)    | 119.9      |
| C(4)-C(3)-H(3)    | 119.9      |
| C(3)-C(4)-C(5)    | 120.1(2)   |
| C(3)-C(4)-H(4)    | 119.9      |
| C(5)-C(4)-H(4)    | 119.9      |
| C(4)-C(5)-C(6)    | 120.60(17) |
| C(4)-C(5)-H(5)    | 119.7      |
| C(6)-C(5)-H(5)    | 119.7      |
| C(1)-C(6)-C(5)    | 118.43(16) |
| C(1)-C(6)-C(7)    | 120.90(15) |
| C(5)-C(6)-C(7)    | 120.66(14) |
| N(1)-C(7)-C(6)    | 112.62(12) |
| N(1)-C(7)-H(7A)   | 109.1      |
| C(6)-C(7)-H(7A)   | 109.1      |
| N(1)-C(7)-H(7B)   | 109.1      |
| C(6)-C(7)-H(7B)   | 109.1      |
| H(7A)-C(7)-H(7B)  | 107.8      |
| C(9)-C(8)-C(13)   | 120.14(16) |
| C(9)-C(8)-H(8)    | 119.9      |
| C(13)-C(8)-H(8)   | 119.9      |
| C(10)-C(9)-C(8)   | 120.46(18) |
| C(10)-C(9)-H(9)   | 119.8      |
| C(8)-C(9)-H(9)    | 119.8      |
| C(11)-C(10)-C(9)  | 119.80(17) |
| C(11)-C(10)-H(10) | 120.1      |
| C(9)-C(10)-H(10)  | 120.1      |
| C(10)-C(11)-C(12) | 120.15(17) |
| C(10)-C(11)-H(11) | 119.9      |
| C(12)-C(11)-H(11) | 119.9      |
| C(11)-C(12)-C(13) | 120.41(16) |
| C(11)-C(12)-H(12) | 119.8      |
| C(13)-C(12)-H(12) | 119.8      |
| C(8)-C(13)-C(12)  | 119.04(14) |
| C(8)-C(13)-C(14)  | 121.74(12) |
| C(12)-C(13)-C(14) | 119.19(13) |
| N(1)-C(14)-C(13)  | 113.27(11) |

|                     |            |
|---------------------|------------|
| N(1)-C(14)-H(14A)   | 108.9      |
| C(13)-C(14)-H(14A)  | 108.9      |
| N(1)-C(14)-H(14B)   | 108.9      |
| C(13)-C(14)-H(14B)  | 108.9      |
| H(14A)-C(14)-H(14B) | 107.7      |
| O(1)-C(15)-N(1)     | 121.46(13) |
| O(1)-C(15)-C(16)    | 117.29(11) |
| N(1)-C(15)-C(16)    | 121.22(12) |
| N(2)-C(16)-C(17)    | 108.08(12) |
| N(2)-C(16)-C(15)    | 128.30(11) |
| C(17)-C(16)-C(15)   | 123.52(12) |
| N(4)-C(17)-N(5)     | 125.93(11) |
| N(4)-C(17)-C(16)    | 104.50(11) |
| N(5)-C(17)-C(16)    | 129.51(12) |
| C(23)-C(18)-C(19)   | 120.11(13) |
| C(23)-C(18)-N(5)    | 121.79(12) |
| C(19)-C(18)-N(5)    | 118.05(12) |
| C(20)-C(19)-C(18)   | 119.56(14) |
| C(20)-C(19)-H(19)   | 120.2      |
| C(18)-C(19)-H(19)   | 120.2      |
| C(21)-C(20)-C(19)   | 120.45(14) |
| C(21)-C(20)-H(20)   | 119.8      |
| C(19)-C(20)-H(20)   | 119.8      |
| C(20)-C(21)-C(22)   | 119.88(14) |
| C(20)-C(21)-H(21)   | 120.1      |
| C(22)-C(21)-H(21)   | 120.1      |
| C(21)-C(22)-C(23)   | 120.17(15) |
| C(21)-C(22)-H(22)   | 119.9      |
| C(23)-C(22)-H(22)   | 119.9      |
| C(18)-C(23)-C(22)   | 119.82(14) |
| C(18)-C(23)-H(23)   | 120.1      |
| C(22)-C(23)-H(23)   | 120.1      |
| C(25)-C(24)-C(29)   | 117.89(15) |
| C(25)-C(24)-H(24)   | 121.1      |
| C(29)-C(24)-H(24)   | 121.1      |
| C(26)-C(25)-C(24)   | 120.89(15) |
| C(26)-C(25)-H(25)   | 119.6      |
| C(24)-C(25)-H(25)   | 119.6      |

|                   |            |
|-------------------|------------|
| C(25)-C(26)-C(27) | 120.38(15) |
| C(25)-C(26)-H(26) | 119.8      |
| C(27)-C(26)-H(26) | 119.8      |
| C(26)-C(27)-C(28) | 119.95(17) |
| C(26)-C(27)-H(27) | 120.0      |
| C(28)-C(27)-H(27) | 120.0      |
| C(29)-C(28)-C(27) | 118.98(15) |
| C(29)-C(28)-H(28) | 120.5      |
| C(27)-C(28)-H(28) | 120.5      |
| C(28)-C(29)-C(24) | 121.90(13) |
| C(28)-C(29)-N(4)  | 118.44(12) |
| C(24)-C(29)-N(4)  | 119.58(13) |
| C(15)-N(1)-C(7)   | 118.93(11) |
| C(15)-N(1)-C(14)  | 126.22(11) |
| C(7)-N(1)-C(14)   | 114.44(10) |
| N(3)-N(2)-C(16)   | 110.07(11) |
| N(2)-N(3)-N(4)    | 107.23(11) |
| C(17)-N(4)-N(3)   | 110.12(10) |
| C(17)-N(4)-C(29)  | 131.90(11) |
| N(3)-N(4)-C(29)   | 117.50(11) |
| C(17)-N(5)-C(18)  | 124.43(12) |
| C(17)-N(5)-H(5A)  | 111.9      |
| C(18)-N(5)-H(5A)  | 114.3      |

---

Symmetry transformations used to generate equivalent atoms:

Table 4. Anisotropic displacement parameters ( $\text{\AA}^2 \times 10^3$ ) for 20200106ZH\_KHAZ0863\_0m\_a.

The anisotropic

displacement factor exponent takes the form:  $-2\pi^2 [ h^2 a^{*2}U^{11} + \dots + 2 h k a^* b^* U^{12} ]$

|      | U <sup>11</sup> | U <sup>22</sup> | U <sup>33</sup> | U <sup>23</sup> | U <sup>13</sup> | U <sup>12</sup> |
|------|-----------------|-----------------|-----------------|-----------------|-----------------|-----------------|
| C(1) | 47(1)           | 57(1)           | 65(1)           | -9(1)           | 34(1)           | 2(1)            |
| C(2) | 54(1)           | 77(1)           | 80(2)           | -18(1)          | 45(1)           | -10(1)          |
| C(3) | 51(1)           | 81(2)           | 53(1)           | -6(1)           | 23(1)           | -21(1)          |
| C(4) | 47(1)           | 53(1)           | 66(1)           | 1(1)            | 12(1)           | -8(1)           |
| C(5) | 35(1)           | 51(1)           | 53(1)           | -4(1)           | 13(1)           | 4(1)            |
| C(6) | 29(1)           | 49(1)           | 29(1)           | -4(1)           | 10(1)           | 3(1)            |



|       |       |       |       |        |       |       |
|-------|-------|-------|-------|--------|-------|-------|
| C(7)  | 32(1) | 49(1) | 30(1) | 3(1)   | 15(1) | 10(1) |
| C(8)  | 45(1) | 41(1) | 43(1) | 5(1)   | 23(1) | -1(1) |
| C(9)  | 65(1) | 38(1) | 57(1) | 8(1)   | 18(1) | -6(1) |
| C(10) | 88(2) | 32(1) | 47(1) | -2(1)  | 12(1) | 14(1) |
| C(11) | 81(1) | 51(1) | 40(1) | 2(1)   | 28(1) | 32(1) |
| C(12) | 50(1) | 44(1) | 37(1) | 6(1)   | 26(1) | 17(1) |
| C(13) | 33(1) | 32(1) | 25(1) | 3(1)   | 14(1) | 6(1)  |
| C(14) | 32(1) | 33(1) | 27(1) | 2(1)   | 18(1) | 4(1)  |
| C(15) | 33(1) | 27(1) | 28(1) | 1(1)   | 18(1) | 3(1)  |
| C(16) | 32(1) | 28(1) | 28(1) | -2(1)  | 18(1) | 1(1)  |
| C(17) | 30(1) | 27(1) | 27(1) | 0(1)   | 16(1) | -1(1) |
| C(18) | 27(1) | 27(1) | 33(1) | -4(1)  | 17(1) | -2(1) |
| C(19) | 40(1) | 31(1) | 37(1) | -4(1)  | 24(1) | -1(1) |
| C(20) | 45(1) | 36(1) | 50(1) | -12(1) | 30(1) | -2(1) |
| C(21) | 42(1) | 29(1) | 62(1) | -6(1)  | 24(1) | 3(1)  |
| C(22) | 47(1) | 34(1) | 47(1) | 6(1)   | 17(1) | 0(1)  |
| C(23) | 42(1) | 36(1) | 34(1) | -2(1)  | 20(1) | -3(1) |
| C(24) | 38(1) | 34(1) | 41(1) | -4(1)  | 24(1) | -1(1) |
| C(25) | 42(1) | 59(1) | 58(1) | -9(1)  | 35(1) | -3(1) |
| C(26) | 32(1) | 91(2) | 72(1) | -6(1)  | 29(1) | 4(1)  |
| C(27) | 31(1) | 88(2) | 52(1) | 6(1)   | 14(1) | 6(1)  |
| C(28) | 33(1) | 54(1) | 40(1) | 2(1)   | 18(1) | -2(1) |
| C(29) | 28(1) | 28(1) | 39(1) | -3(1)  | 19(1) | -2(1) |
| N(1)  | 29(1) | 38(1) | 26(1) | 0(1)   | 14(1) | 6(1)  |
| N(2)  | 32(1) | 37(1) | 32(1) | -7(1)  | 17(1) | 0(1)  |
| N(3)  | 33(1) | 38(1) | 34(1) | -10(1) | 18(1) | -2(1) |
| N(4)  | 29(1) | 31(1) | 30(1) | -5(1)  | 17(1) | -1(1) |
| N(5)  | 33(1) | 34(1) | 28(1) | -5(1)  | 15(1) | 4(1)  |
| O(1)  | 37(1) | 41(1) | 27(1) | -5(1)  | 14(1) | 5(1)  |

Table 5. Hydrogen coordinates ( $\times 10^4$ ) and isotropic displacement parameters ( $\text{\AA}^2 \times 10^{-3}$ ) for 20200106ZH\_KHAZ0863\_0m\_a.

|      | x    | y    | z    | U(eq) |
|------|------|------|------|-------|
| H(1) | 7313 | 2828 | 4337 | 64    |
| H(2) | 7916 | 4510 | 4171 | 78    |

|        |      |       |      |    |
|--------|------|-------|------|----|
| H(3)   | 7800 | 7383  | 4100 | 75 |
| H(4)   | 7085 | 8598  | 4195 | 75 |
| H(5)   | 6493 | 6937  | 4379 | 60 |
| H(7A)  | 6542 | 2434  | 4468 | 44 |
| H(7B)  | 6491 | 3862  | 4898 | 44 |
| H(8)   | 5234 | 889   | 3596 | 51 |
| H(9)   | 5247 | -1967 | 3422 | 70 |
| H(10)  | 5759 | -3011 | 2977 | 78 |
| H(11)  | 6271 | -1200 | 2719 | 70 |
| H(12)  | 6260 | 1663  | 2889 | 50 |
| H(14A) | 6005 | 3961  | 3251 | 35 |
| H(14B) | 5366 | 3853  | 3050 | 35 |
| H(19)  | 4549 | 8158  | 5219 | 40 |
| H(20)  | 4182 | 10793 | 5211 | 49 |
| H(21)  | 3845 | 12476 | 4317 | 54 |
| H(22)  | 3873 | 11538 | 3424 | 55 |
| H(23)  | 4254 | 8928  | 3432 | 44 |
| H(24)  | 3689 | 5557  | 4143 | 42 |
| H(25)  | 2784 | 6124  | 3917 | 58 |
| H(26)  | 2110 | 6785  | 2898 | 76 |
| H(27)  | 2318 | 6831  | 2080 | 72 |
| H(28)  | 3214 | 6215  | 2287 | 51 |
| H(5A)  | 5063 | 6653  | 4675 | 38 |

---

## 11. Computational details

All the DFT calculations were performed using Gaussian09 (Revision D.01).<sup>[4]</sup> Geometry optimizations were carried out with B3LYP<sup>[5]</sup> level of theory. Lanl2dz<sup>[6]</sup> basis set was used for Pd, I and K atom and 6-31G(d, p)<sup>[7]</sup> basis set for other atoms. Gibbs free energy was corrected by frequency calculations using the optimized structures. Single point energies of the optimized geometries were calculated at the level of M06<sup>[8]</sup> denoting the basis set combination of SDD<sup>[9]</sup> for Pd and 6-311+G(d, p) for all other atoms. Single point solvation energy corrections in MeCN computed by the IEFPCM<sup>[10]</sup> method were added to the gas-phase free energy.

### 1). Free-energy profile of nucleophilic addition/cyclization of carbodiimide **1i** with diazo **2a**.

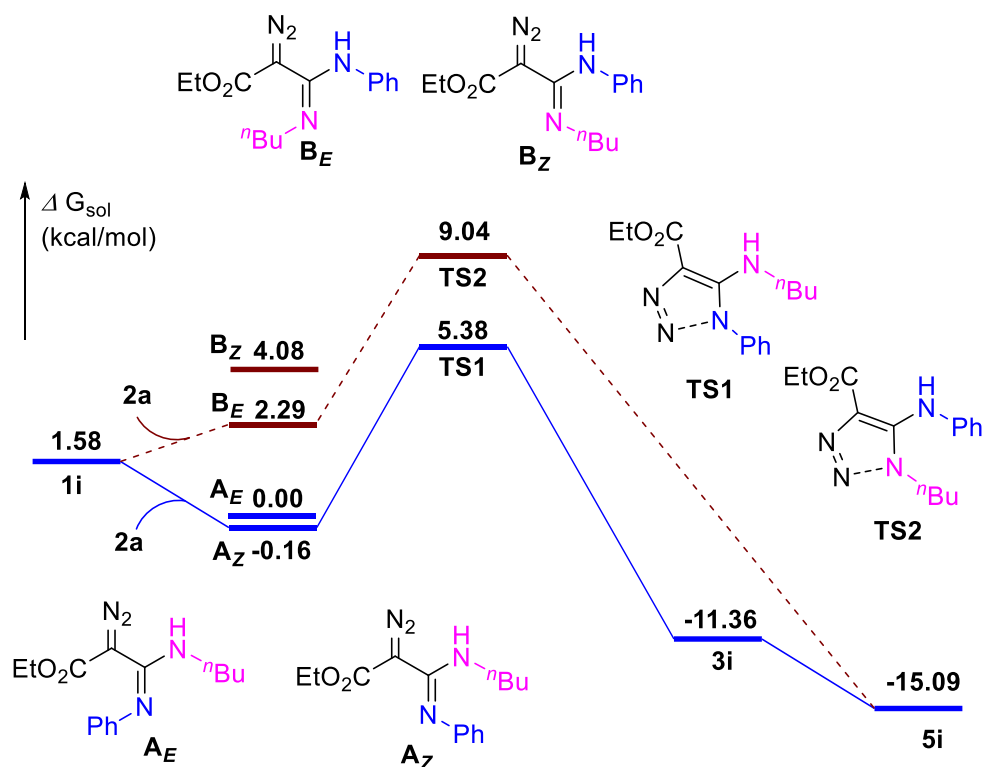

## 2). B3LYP and M06 absolute calculation energies and free energies

| Geometry             | $E_{(\text{elec-B3LYP})}^1$ | $G_{(\text{corr-B3LYP})}^2$ | $E_{(\text{sol-M06})}^3$ |
|----------------------|-----------------------------|-----------------------------|--------------------------|
| <b>1i</b>            | -536.921751                 | 0.186546                    | -536.8150427             |
| <b>2a</b>            | -415.880903                 | 0.07108                     | -415.81540289            |
| <b>A<sub>E</sub></b> | -952.800677                 | 0.284033                    | -952.659364321           |
| <b>A<sub>Z</sub></b> | -952.748385                 | 0.284028                    | -952.3755922             |
| <b>B<sub>E</sub></b> | -952.797989                 | 0.284042                    | -952.655717914           |
| <b>B<sub>Z</sub></b> | -952.737900                 | 0.28311                     | -952.3688254             |
| <b>TS1</b>           | -952.799674                 | 0.285429                    | -952.652192851           |
| <b>TS2</b>           | -952.794202                 | 0.286088                    | -952.647016352           |
| <b>3i</b>            | -952.825138                 | 0.28978                     | -952.683220483           |
| <b>4i</b>            | -952.829718                 | 0.289968                    | -952.689347028           |

1. The electronic and thermal energy calculated by B3LYP in gas phase. 2. The thermal correction to Gibbs free energy calculated 3. The electronic and thermal energy calculated by M06 in MeCN.

## 3). B3LYP optimized Cartesian coordinates.

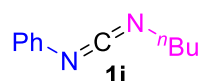

Charge: 0 Multiplicity: 1

|   |             |             |             |
|---|-------------|-------------|-------------|
| C | -2.11934200 | -0.48478300 | -0.01702200 |
| C | -3.39867500 | -0.89604400 | 0.37857600  |
| C | -1.90088000 | 0.86023000  | -0.35625300 |

|   |             |             |             |
|---|-------------|-------------|-------------|
| C | -4.44264200 | 0.02507800  | 0.43824600  |
| H | -3.55298000 | -1.93905000 | 0.63408300  |
| C | -2.95000600 | 1.77378400  | -0.29460200 |
| H | -0.91066600 | 1.17903300  | -0.66975700 |
| C | -4.22467500 | 1.36269200  | 0.10323300  |
| H | -5.43039600 | -0.30473000 | 0.74681400  |
| H | -2.77108600 | 2.81191400  | -0.55985900 |
| H | -5.03949000 | 2.07863500  | 0.14997000  |
| N | -1.10749900 | -1.46133100 | -0.06195500 |
| C | 0.09153900  | -1.31829800 | -0.30512900 |
| N | 1.25869700  | -1.33888100 | -0.65691400 |
| C | 3.20997600  | 0.11477600  | -0.23741200 |
| H | 3.37798300  | 0.12265200  | -1.32132500 |
| H | 2.55928000  | 0.97085200  | -0.01642900 |
| C | 2.47565200  | -1.17678200 | 0.13500500  |
| H | 3.12048700  | -2.03708900 | -0.07879200 |
| H | 2.25387200  | -1.19287900 | 1.21012200  |
| C | 4.54365300  | 0.26979000  | 0.50336600  |
| H | 5.18637800  | -0.59181500 | 0.27782900  |
| H | 4.36599500  | 0.24168500  | 1.58699000  |
| C | 5.27863200  | 1.56367900  | 0.14099600  |
| H | 6.22602500  | 1.64835700  | 0.68246300  |
| H | 5.50220300  | 1.60500100  | -0.93074600 |
| H | 4.67461600  | 2.44419600  | 0.38669200  |

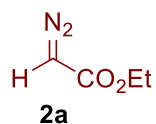

Charge: 0    Multiplicity: 1

|   |             |             |             |
|---|-------------|-------------|-------------|
| C | -1.68354200 | 0.62985200  | -0.00006900 |
| H | -2.44105900 | 1.39916700  | 0.00002200  |
| N | -2.08646000 | -0.61297700 | -0.00003800 |
| N | -2.42556000 | -1.69950000 | 0.00026000  |
| C | -0.26228300 | 0.96149900  | -0.00006400 |
| O | 0.15756600  | 2.10188900  | -0.00001000 |
| O | 0.51722700  | -0.14777700 | -0.00005800 |
| C | 1.94381800  | 0.09371000  | -0.00001900 |
| H | 2.20151000  | 0.68724300  | -0.88261700 |
| H | 2.20146400  | 0.68722700  | 0.88260300  |
| C | 2.63283500  | -1.25672300 | -0.00001300 |
| H | 3.71826900  | -1.11766900 | 0.00001600  |
| H | 2.36030200  | -1.83578100 | 0.88684500  |
| H | 2.36034600  | -1.83576600 | -0.88689400 |

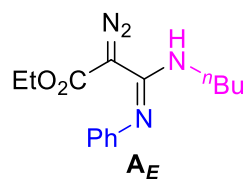

Charge: 0    Multiplicity: 1

|   |             |             |             |
|---|-------------|-------------|-------------|
| C | -0.09069600 | -0.22186300 | -0.48188700 |
| C | 0.72413000  | -1.22400700 | 0.21784100  |
| O | 1.53996200  | -0.96555000 | 1.08174300  |
| O | 0.45024000  | -2.47685400 | -0.21838000 |
| C | 1.18759100  | -3.54325900 | 0.42711000  |
| H | 1.00461400  | -3.49546300 | 1.50467600  |
| H | 2.25749400  | -3.37862300 | 0.26597200  |
| C | 0.71313500  | -4.85059000 | -0.17607500 |
| H | 1.24814700  | -5.68562800 | 0.28637700  |
| H | -0.35801100 | -4.99274100 | -0.00825500 |
| H | 0.90017600  | -4.87654900 | -1.25324300 |
| N | -0.96221600 | -0.66715400 | -1.36349300 |
| N | -1.69939600 | -1.05352700 | -2.13337700 |
| C | -0.13727000 | 1.24280100  | -0.17111300 |
| N | -1.21859300 | 1.93394500  | -0.01577500 |
| N | 1.06427200  | 1.88435600  | -0.06114600 |
| H | 0.94205800  | 2.85100000  | 0.21460200  |
| C | 2.33466900  | 1.54148200  | -0.68725600 |
| H | 2.50878900  | 2.19406200  | -1.55706200 |
| H | 2.26676800  | 0.52174500  | -1.07005400 |
| C | 3.50435700  | 1.65415200  | 0.29469000  |
| H | 3.53273200  | 2.67368400  | 0.70560000  |
| H | 3.31010600  | 0.97724000  | 1.13282800  |
| C | 4.85497100  | 1.33031800  | -0.35402200 |
| H | 5.02164900  | 1.99694500  | -1.21145300 |
| H | 4.82420300  | 0.31094000  | -0.76234300 |
| C | 6.02931900  | 1.45074700  | 0.62178900  |
| H | 6.97946200  | 1.20639500  | 0.13608800  |
| H | 6.11112700  | 2.46859900  | 1.01951400  |
| H | 5.90488000  | 0.77289100  | 1.47325800  |
| C | -2.47772500 | 1.36240500  | 0.20932000  |
| C | -3.57154400 | 1.81958400  | -0.54771100 |
| C | -2.71531200 | 0.42082700  | 1.22930400  |
| C | -4.85266300 | 1.32569000  | -0.31541800 |
| H | -3.39212200 | 2.56451000  | -1.31684600 |
| C | -4.00223600 | -0.06285700 | 1.46043600  |

|   |             |             |             |
|---|-------------|-------------|-------------|
| H | -1.88738700 | 0.09521200  | 1.85215600  |
| C | -5.07723200 | 0.37934500  | 0.68753600  |
| H | -5.68201800 | 1.68656500  | -0.91761400 |
| H | -4.16552900 | -0.78476400 | 2.25624100  |
| H | -6.07818200 | 0.00123100  | 0.87192600  |

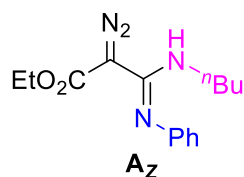

Charge: 0    Multiplicity: 1

|   |             |             |             |
|---|-------------|-------------|-------------|
| C | 0.88634300  | -1.11968500 | -0.26782300 |
| C | 2.16809900  | -0.65893000 | 0.27995300  |
| O | 2.34024500  | 0.39389100  | 0.86476800  |
| O | 3.15258800  | -1.56179300 | 0.04749000  |
| C | 4.45969200  | -1.21450800 | 0.56361900  |
| H | 4.38345200  | -1.06599300 | 1.64494900  |
| H | 4.77232100  | -0.26383300 | 0.12075200  |
| C | 5.40201000  | -2.34754400 | 0.20768400  |
| H | 6.40555300  | -2.12393900 | 0.58223900  |
| H | 5.06952700  | -3.28843000 | 0.65486200  |
| H | 5.46139100  | -2.48241700 | -0.87595100 |
| N | 0.87604100  | -2.33205900 | -0.79711900 |
| N | 0.88331800  | -3.35921200 | -1.27120300 |
| C | -0.46414300 | -0.53230800 | -0.06213600 |
| N | -1.42875900 | -1.38247600 | 0.09728300  |
| N | -0.58185200 | 0.83053300  | 0.00081600  |
| H | -1.52708100 | 1.12373600  | 0.21617000  |
| C | 0.21107600  | 1.82785900  | -0.71634600 |
| H | -0.32186400 | 2.13237300  | -1.63108800 |
| H | 1.14892000  | 1.37002400  | -1.02885200 |
| C | 0.49954100  | 3.05180500  | 0.15457400  |
| H | -0.45068500 | 3.47651900  | 0.50990200  |
| H | 1.05141100  | 2.71529800  | 1.03791100  |
| C | 1.29206500  | 4.13245200  | -0.58994200 |
| H | 0.74536800  | 4.43309000  | -1.49456100 |
| H | 2.24353900  | 3.70637900  | -0.93545300 |
| C | 1.57088500  | 5.36811400  | 0.27075200  |
| H | 2.14426600  | 6.11905500  | -0.28223700 |
| H | 0.63846900  | 5.83921800  | 0.60181700  |
| H | 2.14335700  | 5.10387800  | 1.16656800  |
| C | -2.76881300 | -0.95677900 | 0.13441000  |
| C | -3.39643800 | -0.35670900 | -0.97529400 |

|   |             |             |             |
|---|-------------|-------------|-------------|
| C | -3.54118700 | -1.21680300 | 1.27996900  |
| C | -4.75035400 | -0.02498700 | -0.93137800 |
| H | -2.81805500 | -0.17923100 | -1.87774000 |
| C | -4.89143100 | -0.87531400 | 1.31882700  |
| H | -3.06190800 | -1.69348800 | 2.12921700  |
| C | -5.50497200 | -0.27718100 | 0.21558200  |
| H | -5.21770400 | 0.42833000  | -1.80148000 |
| H | -5.46930400 | -1.08279100 | 2.21529200  |
| H | -6.55910200 | -0.01895400 | 0.24646900  |

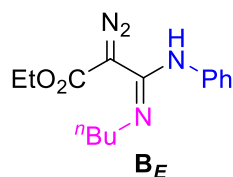

Charge: 0    Multiplicity: 1

|   |             |             |             |
|---|-------------|-------------|-------------|
| C | -1.29085100 | -0.76106800 | 0.30065600  |
| C | -2.43413600 | -0.30273900 | -0.49889300 |
| O | -2.34841700 | 0.49692200  | -1.40914200 |
| O | -3.58724800 | -0.89129100 | -0.10063300 |
| C | -4.77177700 | -0.51714700 | -0.84585500 |
| H | -4.62168000 | -0.77591000 | -1.89850300 |
| H | -4.89541700 | 0.56830600  | -0.78679000 |
| C | -5.94379700 | -1.26042300 | -0.23596500 |
| H | -6.86206000 | -1.00546600 | -0.77365700 |
| H | -5.79778900 | -2.34242300 | -0.29874400 |
| H | -6.07468500 | -0.99015600 | 0.81556900  |
| N | -1.49918500 | -1.68191300 | 1.21376300  |
| N | -1.66042800 | -2.47621000 | 2.01251600  |
| C | 0.11588900  | -0.24615300 | 0.12225200  |
| N | 0.46870100  | 0.97655500  | 0.18111900  |
| N | 1.01233500  | -1.28500900 | -0.10249500 |
| H | 0.58421100  | -2.15808600 | -0.37104000 |
| C | 2.41606200  | -1.28184200 | -0.18693400 |
| C | 3.03398100  | -2.50567700 | -0.50215800 |
| C | 3.21596000  | -0.15223800 | 0.04604600  |
| C | 4.41888200  | -2.60123500 | -0.57955300 |
| H | 2.42039000  | -3.38597300 | -0.68328000 |
| C | 4.60441800  | -0.26744400 | -0.02993600 |
| H | 2.74111100  | 0.79156900  | 0.26931700  |
| C | 5.21747500  | -1.48045000 | -0.34154200 |
| H | 5.21186300  | 0.61462000  | 0.15268500  |
| H | 6.29882200  | -1.55280500 | -0.40241300 |

|   |             |             |             |
|---|-------------|-------------|-------------|
| C | -0.46803500 | 2.02942400  | 0.53781800  |
| H | -0.95937600 | 2.38409100  | -0.37624900 |
| H | -1.27128300 | 1.65910000  | 1.19426500  |
| C | 0.25412900  | 3.18896800  | 1.23749600  |
| H | -0.50694000 | 3.89926000  | 1.58957600  |
| H | 0.75157200  | 2.79580700  | 2.13308300  |
| C | 1.28191500  | 3.93215700  | 0.36939500  |
| H | 1.83696500  | 4.62935300  | 1.01002000  |
| H | 2.01475100  | 3.21161300  | -0.01157500 |
| C | 0.67303700  | 4.70835600  | -0.80371000 |
| H | -0.06531300 | 5.44068100  | -0.45564900 |
| H | 1.44525700  | 5.25394100  | -1.35600500 |
| H | 0.17227800  | 4.04495200  | -1.51599200 |
| H | 4.87377300  | -3.55641500 | -0.82545400 |

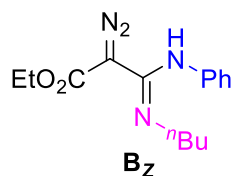

Charge: 0    Multiplicity: 1

|   |             |             |             |
|---|-------------|-------------|-------------|
| C | -1.59102000 | -0.62116600 | -0.02250600 |
| C | -2.73716000 | 0.29747700  | -0.17468800 |
| O | -2.65745300 | 1.45803400  | -0.50786800 |
| O | -3.90503100 | -0.34765100 | 0.07965400  |
| C | -5.10341000 | 0.44554300  | -0.08784000 |
| H | -5.14383400 | 0.81211800  | -1.11841200 |
| H | -5.04233200 | 1.31799800  | 0.56958100  |
| C | -6.28589400 | -0.44154600 | 0.24913100  |
| H | -7.21591700 | 0.12390900  | 0.13589900  |
| H | -6.32811900 | -1.30918300 | -0.41547600 |
| H | -6.22476000 | -0.79998100 | 1.28050600  |
| N | -1.85502100 | -1.89219700 | 0.18940500  |
| N | -2.06909500 | -2.99641000 | 0.36137700  |
| C | -0.16466100 | -0.19972300 | -0.06323400 |
| N | 0.14622000  | 0.91923300  | 0.46152700  |
| N | 0.67348600  | -1.11350300 | -0.72773500 |
| H | 0.25917600  | -1.61643100 | -1.50011300 |
| C | 1.95366600  | -1.54691500 | -0.33664700 |
| C | 2.76693300  | -2.19088600 | -1.28265300 |
| C | 2.41656400  | -1.40719400 | 0.98106100  |
| C | 4.01723400  | -2.68215700 | -0.91711600 |
| H | 2.41511700  | -2.29831700 | -2.30567200 |



|   |            |             |             |
|---|------------|-------------|-------------|
| C | 3.67677700 | -1.89057300 | 1.33003200  |
| H | 1.78353200 | -0.93853300 | 1.72629900  |
| C | 4.48516500 | -2.53030000 | 0.38971800  |
| H | 4.02091800 | -1.77474200 | 2.35376100  |
| H | 5.46336900 | -2.90698900 | 0.67068700  |
| H | 4.63118800 | -3.17972800 | -1.66225400 |
| C | 1.43461000 | 1.54554000  | 0.22420500  |
| H | 2.12428700 | 1.28930300  | 1.04246500  |
| H | 1.90962800 | 1.18046500  | -0.69953800 |
| C | 1.26347800 | 3.06765900  | 0.16703100  |
| H | 0.54797000 | 3.31132000  | -0.62822700 |
| H | 0.80277500 | 3.40324900  | 1.10423400  |
| C | 2.58441000 | 3.80856700  | -0.06826800 |
| H | 3.29550800 | 3.55003200  | 0.72872900  |
| H | 3.03969100 | 3.45657500  | -1.00419500 |
| C | 2.41488200 | 5.32973100  | -0.12564400 |
| H | 1.99448500 | 5.71608800  | 0.80964700  |
| H | 3.37192400 | 5.83434100  | -0.29429000 |
| H | 1.73669700 | 5.62123700  | -0.93543700 |

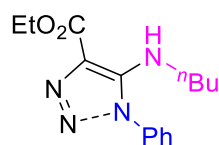

**TS1**

Charge: 0 Multiplicity: 1

|   |             |             |             |
|---|-------------|-------------|-------------|
| C | 0.22421800  | -0.46152000 | -0.01633100 |
| C | 1.69029400  | -0.74450500 | -0.08312000 |
| N | -0.55173100 | -1.44578200 | -0.34483600 |
| N | 1.29562500  | -2.97129200 | -0.66463800 |
| N | 1.89004000  | -2.01682200 | -0.41838600 |
| N | -0.09360100 | 0.81231700  | 0.33680000  |
| H | 0.71254300  | 1.41028000  | 0.50913000  |
| C | -1.91094700 | -1.60506300 | -0.07981400 |
| C | -2.74674500 | -2.10987300 | -1.09277900 |
| C | -2.45966600 | -1.38714900 | 1.19980300  |
| C | -4.09443400 | -2.35302900 | -0.84280900 |
| H | -2.31538200 | -2.30411900 | -2.06955700 |
| C | -3.80903000 | -1.63845400 | 1.44163300  |
| H | -1.81364400 | -1.03696000 | 1.99924100  |
| C | -4.63617600 | -2.11686900 | 0.42358100  |
| H | -4.72524200 | -2.73529700 | -1.64058600 |

|   |             |             |             |
|---|-------------|-------------|-------------|
| H | -4.21392900 | -1.46500700 | 2.43499900  |
| H | -5.68639500 | -2.31302900 | 0.61665400  |
| C | 2.78063300  | 0.17146500  | 0.16135400  |
| O | 2.63323600  | 1.34861200  | 0.48403100  |
| O | 3.99232000  | -0.40409900 | 0.00134700  |
| C | 5.13352200  | 0.45274700  | 0.24122500  |
| H | 5.08871700  | 0.82222600  | 1.27044200  |
| H | 5.07142900  | 1.31970700  | -0.42351500 |
| C | 6.37892400  | -0.37338500 | -0.01402400 |
| H | 7.26952800  | 0.23903800  | 0.15705700  |
| H | 6.42070700  | -1.23669300 | 0.65593100  |
| H | 6.40314600  | -0.73600000 | -1.04541600 |
| C | -1.37563400 | 1.46311100  | 0.07765300  |
| H | -1.81187500 | 1.05087600  | -0.83934400 |
| H | -2.08910600 | 1.25072400  | 0.88392500  |
| C | -1.18202600 | 2.97445800  | -0.06270800 |
| H | -0.71720700 | 3.36539100  | 0.85316200  |
| H | -0.47676000 | 3.17488400  | -0.88003200 |
| C | -2.49951600 | 3.71521700  | -0.32136300 |
| H | -3.20316200 | 3.50001000  | 0.49358700  |
| H | -2.96278900 | 3.32077700  | -1.23536600 |
| C | -2.31607800 | 5.22981000  | -0.45310100 |
| H | -3.27082500 | 5.73097600  | -0.64070600 |
| H | -1.88875800 | 5.65853100  | 0.46022800  |
| H | -1.64179900 | 5.47685500  | -1.28063300 |

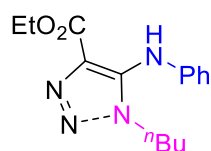

**TS2**

Charge: 0 Multiplicity: 1

|   |             |             |             |
|---|-------------|-------------|-------------|
| C | -0.20278600 | -0.25887700 | 0.00575400  |
| C | -1.63668200 | -0.65338200 | 0.14384200  |
| N | 0.66393800  | -1.13750600 | 0.36390400  |
| N | -1.01151900 | -2.76839000 | 0.89791700  |
| N | -1.70930500 | -1.90434700 | 0.59239300  |
| N | -0.00437200 | 0.99636900  | -0.53754400 |
| H | -0.86657900 | 1.42187200  | -0.88017100 |
| C | -2.80807200 | 0.11527200  | -0.21082700 |
| O | -2.76922000 | 1.22888000  | -0.73055300 |
| O | -3.96116200 | -0.52444900 | 0.07947300  |
| C | -5.17716300 | 0.17389900  | -0.27986300 |
| H | -5.16115100 | 0.38395100  | -1.35371000 |

|   |             |             |             |
|---|-------------|-------------|-------------|
| H | -5.20073900 | 1.13425600  | 0.24405900  |
| C | -6.34010600 | -0.71715200 | 0.11025700  |
| H | -7.28371600 | -0.22484200 | -0.14409900 |
| H | -6.29625000 | -1.67265000 | -0.41982300 |
| H | -6.33544200 | -0.91854300 | 1.18507700  |
| C | 2.07934200  | -1.08030100 | 0.06257900  |
| H | 2.26833500  | -0.47975500 | -0.84011000 |
| H | 2.62202000  | -0.58408500 | 0.88043100  |
| C | 2.63596200  | -2.49643300 | -0.12350300 |
| H | 2.41740700  | -3.07860600 | 0.78039400  |
| H | 2.09319300  | -2.98565300 | -0.94242600 |
| C | 4.14134800  | -2.51310700 | -0.41039800 |
| H | 4.67449500  | -2.01530300 | 0.41119400  |
| H | 4.34933600  | -1.91779600 | -1.30996400 |
| C | 4.69876300  | -3.92758700 | -0.59591200 |
| H | 4.21204900  | -4.43796700 | -1.43462700 |
| H | 5.77501900  | -3.91083900 | -0.79593400 |
| H | 4.53533800  | -4.53732700 | 0.29975500  |
| C | 1.00917100  | 1.91338000  | -0.16164200 |
| C | 1.34675400  | 2.92883300  | -1.06805400 |
| C | 1.62541000  | 1.88381100  | 1.09723900  |
| C | 2.29089100  | 3.89260100  | -0.72242000 |
| H | 0.86760400  | 2.94910500  | -2.04251900 |
| C | 2.58317000  | 2.84302300  | 1.42635600  |
| H | 1.33869000  | 1.12535900  | 1.81749500  |
| C | 2.92125900  | 3.85114600  | 0.52316100  |
| H | 2.54070100  | 4.67384200  | -1.43439100 |
| H | 3.05444600  | 2.80810500  | 2.40441600  |
| H | 3.66354000  | 4.59777600  | 0.78747300  |

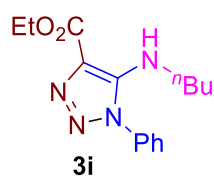

Charge: 0 Multiplicity: 1

|   |             |             |             |
|---|-------------|-------------|-------------|
| C | 0.38514000  | -0.25811600 | 0.12531700  |
| C | 1.72977500  | -0.63706000 | 0.02837900  |
| N | -0.29657200 | -1.41866200 | -0.08614600 |
| N | 0.60759300  | -2.46252600 | -0.31795400 |
| N | 1.79370700  | -1.97728800 | -0.24071000 |
| N | -0.13621800 | 0.97998700  | 0.40645900  |
| H | 0.64873300  | 1.61746900  | 0.54625400  |
| C | -1.67986800 | -1.73382100 | 0.02734700  |

|   |             |             |             |
|---|-------------|-------------|-------------|
| C | -2.23939200 | -2.64341600 | -0.87437600 |
| C | -2.44819200 | -1.18414700 | 1.05886600  |
| C | -3.58124200 | -2.99600000 | -0.74346200 |
| H | -1.61718700 | -3.06909700 | -1.65271400 |
| C | -3.79355400 | -1.53448200 | 1.16830100  |
| H | -1.99130700 | -0.49575700 | 1.76150200  |
| C | -4.36288500 | -2.43993100 | 0.27119100  |
| H | -4.01729600 | -3.70447600 | -1.44101400 |
| H | -4.39283700 | -1.10710200 | 1.96645300  |
| H | -5.40928900 | -2.71356100 | 0.36462200  |
| C | 2.85498900  | 0.27856000  | 0.16939500  |
| O | 2.70923600  | 1.46938100  | 0.43890600  |
| O | 4.05048300  | -0.29637300 | -0.02620500 |
| C | 5.19985600  | 0.57092500  | 0.10965200  |
| H | 5.19974400  | 1.00370300  | 1.11508200  |
| H | 5.10701300  | 1.39628900  | -0.60327200 |
| C | 6.43306000  | -0.27191100 | -0.14972900 |
| H | 7.33106400  | 0.34653000  | -0.05508400 |
| H | 6.50170900  | -1.09398300 | 0.56793500  |
| H | 6.41018800  | -0.69696300 | -1.15689700 |
| C | -1.19831900 | 1.57087800  | -0.42731900 |
| H | -0.86424600 | 1.66925500  | -1.47218400 |
| H | -2.06508800 | 0.90550800  | -0.42792400 |
| C | -1.59886600 | 2.93844400  | 0.12440500  |
| H | -1.93607800 | 2.81819800  | 1.16173300  |
| H | -0.71363200 | 3.58917000  | 0.15968000  |
| C | -2.69382500 | 3.61504400  | -0.70885300 |
| H | -3.57684900 | 2.96304700  | -0.74514700 |
| H | -2.34945800 | 3.71902700  | -1.74641900 |
| C | -3.09489700 | 4.98897000  | -0.16410500 |
| H | -3.87739600 | 5.44675700  | -0.77721600 |
| H | -3.47570900 | 4.91351300  | 0.86048500  |
| H | -2.24008200 | 5.67420600  | -0.14907700 |

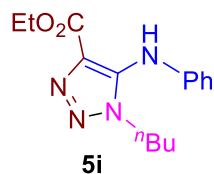

Charge: 0    Multiplicity: 1

|   |             |             |            |
|---|-------------|-------------|------------|
| C | -0.36935500 | -0.24986800 | 0.16656100 |
| C | -1.72970400 | -0.55299800 | 0.29227300 |
| N | 0.25474800  | -1.22952400 | 0.86841700 |
| N | -0.68667200 | -2.09286100 | 1.40526800 |

|   |             |             |             |
|---|-------------|-------------|-------------|
| N | -1.85694100 | -1.68061100 | 1.05526300  |
| N | 0.20674000  | 0.74966800  | -0.57849300 |
| H | -0.50762300 | 1.20771900  | -1.14477400 |
| C | -2.79804200 | 0.21322500  | -0.33706500 |
| O | -2.57143300 | 1.14560300  | -1.10698400 |
| O | -4.03074200 | -0.19082100 | -0.00295200 |
| C | -5.12373500 | 0.52932100  | -0.61945400 |
| H | -5.03401500 | 0.44445400  | -1.70710000 |
| H | -5.03728000 | 1.59000600  | -0.36389600 |
| C | -6.41216000 | -0.08018900 | -0.10288200 |
| H | -7.26955000 | 0.43516300  | -0.54683100 |
| H | -6.47330300 | -1.14066200 | -0.36197100 |
| H | -6.47844500 | 0.01177600  | 0.98465000  |
| C | 1.66337000  | -1.60843000 | 0.94484200  |
| H | 2.25373300  | -0.73665800 | 1.23827500  |
| H | 1.71427400  | -2.34384400 | 1.75161700  |
| C | 2.18768100  | -2.20262600 | -0.36779600 |
| H | 1.56536900  | -3.06534500 | -0.63533900 |
| H | 2.07305600  | -1.46533400 | -1.17163100 |
| C | 3.65741000  | -2.62675400 | -0.25873000 |
| H | 3.76645300  | -3.35471600 | 0.55639900  |
| H | 4.26671300  | -1.75769900 | 0.02340300  |
| C | 4.19883200  | -3.22970800 | -1.55818000 |
| H | 4.13412300  | -2.51279400 | -2.38412500 |
| H | 5.24805100  | -3.52268900 | -1.45295500 |
| H | 3.63124700  | -4.12081300 | -1.84788000 |
| C | 1.28641900  | 1.57596800  | -0.17273700 |
| C | 1.97401600  | 2.29004900  | -1.16451100 |
| C | 1.65789600  | 1.73260400  | 1.17009300  |
| C | 3.01734600  | 3.14401300  | -0.81650500 |
| H | 1.68479600  | 2.16399700  | -2.20370900 |
| C | 2.71944300  | 2.57412400  | 1.50571700  |
| H | 1.10064400  | 1.22123200  | 1.94852500  |
| C | 3.40304600  | 3.28423200  | 0.51880600  |
| H | 3.53844500  | 3.69380400  | -1.59471900 |
| H | 2.99744800  | 2.68697800  | 2.54954800  |
| H | 4.22335200  | 3.94269600  | 0.78622500  |

## References:

- [1] A. R. Ali, H. Ghosh, B. K. Patel, *Tetrahedron Lett.* **2010**, *51*, 1019-1021. Tateno, K.; Ogawa, R.; Sakamoto, R.; Tsuchiya, M.; Kutsumura, N.; Otani, T.; Ono, K.; Kawai, H.; Saito, T. *J. Org. Chem.* **2018**, *83*, 690.
- [2] Liu, Q.; Li, M.; Xiong, R.; Mo, F. *Org. Lett.* **2017**, *19*, 6756.
- [3] Dorokhov, V. A.; Komkov, A. V. *Russ.Chem.Bull., Int.Ed.* **2004**, *53*, 676.
- [4] Frisch, M. J.; Trucks, G. W.; Schlegel, H. B.; Scuseria, G. E.; Robb, M. A.; Cheeseman, J. R.; Scalmani, G.; Barone, V.; Mennucci, B.; Petersson, G. A.; Nakatsuji, H.; Caricato, M.; Li, X.; Hratchian, H. P.; Izmaylov, A. F.; Bloino, J.; Zheng, G.; Sonnenberg, J. L.; Hada, M.; Ehara, M.; Toyota, K.; Fukuda, R.; Hasegawa, J.; Ishida, M.; Nakajima, T.; Honda, Y.; Kitao, O.; Nakai, H.; Vreven, T.; Montgomery, J. A., Jr.; Peralta, J. E.; Ogliaro, F.; Bearpark, M.; Heyd, J. J.; Brothers, E.; Kudin, K. N.; Staroverov, V. N.; Kobayashi, R.; Normand, J.; Raghavachari, K.; Rendell, A.; Burant, J. C.; Iyengar, S. S.; Tomasi, J.; Cossi, M.; Rega, N.; Millam, N. J.; Klene, M.; Knox, J. E.; Cross, J. B.; Bakken, V.; Adamo, C.; Jaramillo, J.; Gomperts, R.; Stratmann, R. E.; Yazyev, O.; Austin, A. J.; Cammi, R.; Pomelli, C.; Ochterski, J. W.; Martin, R. L.; Morokuma, K.; Zakrzewski, V. G.; Voth, G. A.; Salvador, P.; Dannenberg, J. J.; Dapprich, S.; Daniels, A. D.; Farkas, Ö.; Foresman, J. B.; Ortiz, J. V.; Cioslowski, J.; Fox, D. J. Gaussian 09, Revision D.01, Gaussian, Inc., Wallingford CT, **2013**.
- [5] a) C. Lee, W. Yang, R. G. Parr, *Phys. Rev. B* **1988**, *37*, 785-789; b) A. D. Becke, *J. Chem. Phys.* **1993**, *98*, 5648-5652.
- [6] a) P. J. Hay, *J. Chem. Phys.* **1977**, *66*, 4377-4384; b) P. J. Hay, W. R. Wadt, *J. Chem. Phys.* **1985**, *82*, 299-310.
- [7] A. J. H. Wachters, *J. Chem. Phys.* **1970**, *52*, 1033-1036.
- [8] a) Y. Zhao, D. G. Truhlar, *Theor. Chem. Acc.* **2008**, *120*, 215-241; b) Y. Zhao, D. G. Truhlar, *J. Chem. Theory Comput.* **2009**, *5*, 324-333.
- [9] a) M. Dolg, U. Wedig, H. Stoll, H. Preuss, *J. Chem. Phys.* **1987**, *86*, 866-872; b) D. Andrae, U. Häußermann, M. Dolg, H. Stoll, H. Preuß, *Theoretica Chimica Acta* **1990**, *77*, 123-141.
- [10] a) E. Cancès, B. Mennucci, J. Tomasi, *J. Chem. Phys.* **1997**, *107*, 3032-3041; b) M. Cossi, V. Barone, B. Mennucci, J. Tomasi, *Chem. Phys. Lett.* **1998**, *286*, 253-260.

## 12. Copy of $^1\text{H}$ and $^{13}\text{C}$ NMR for new Compounds

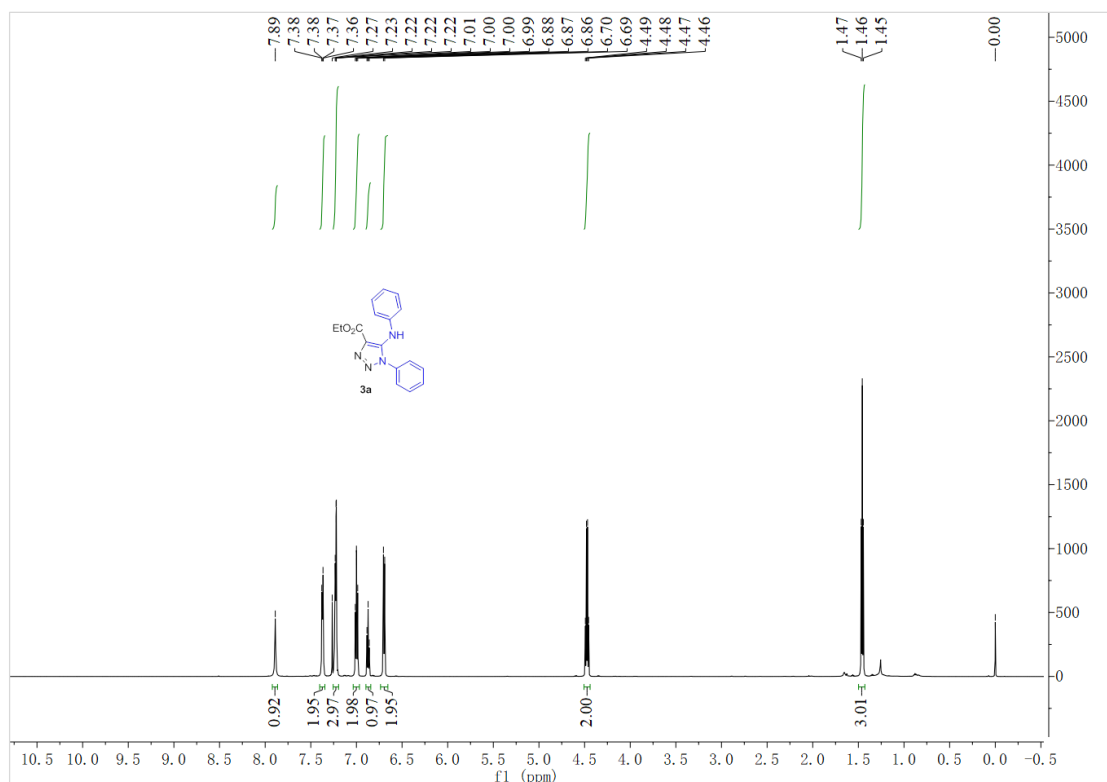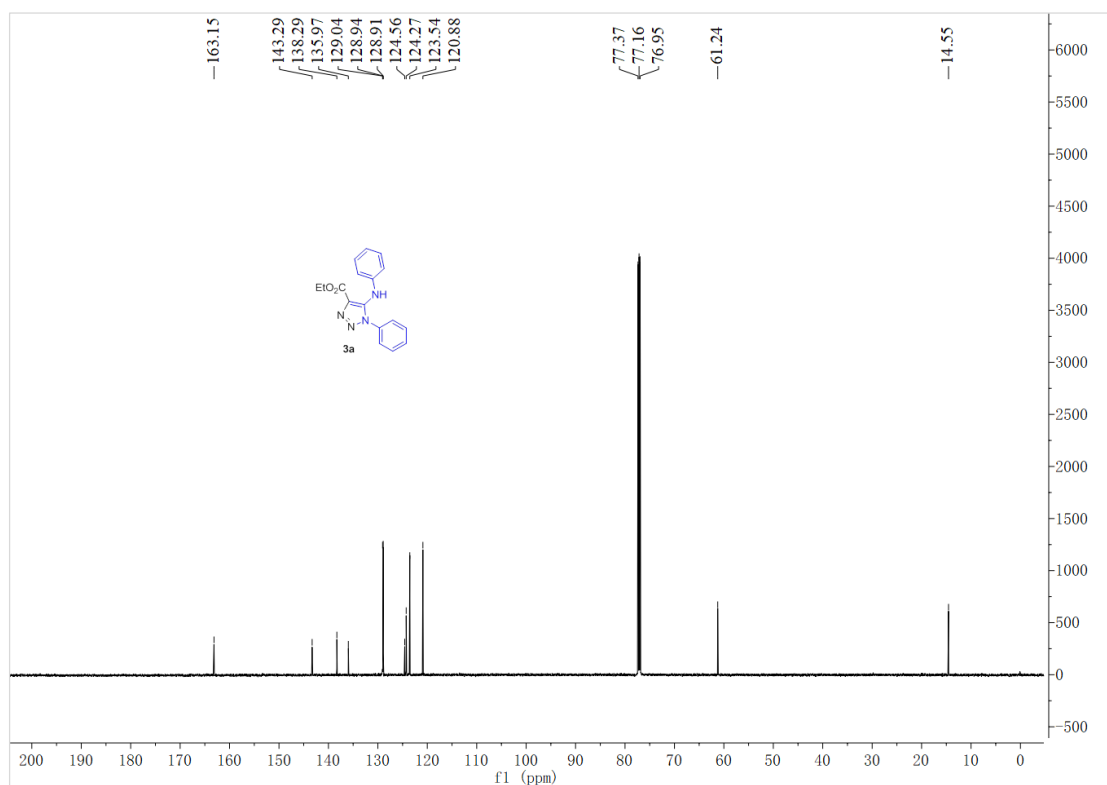

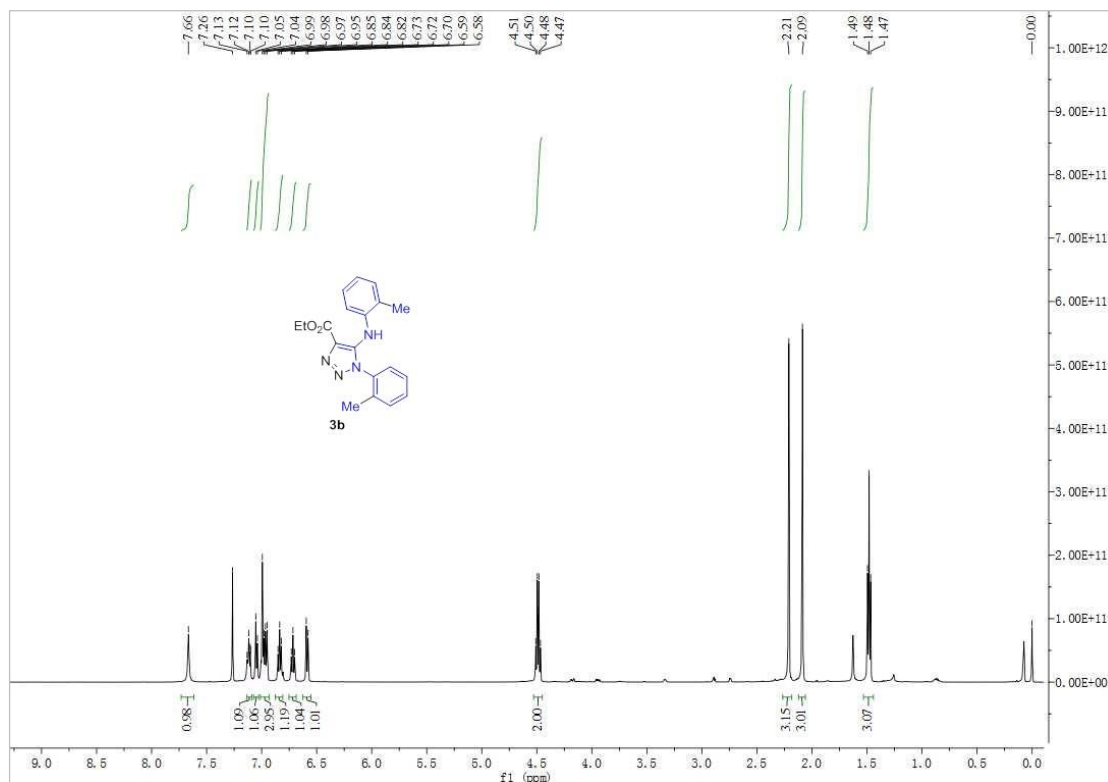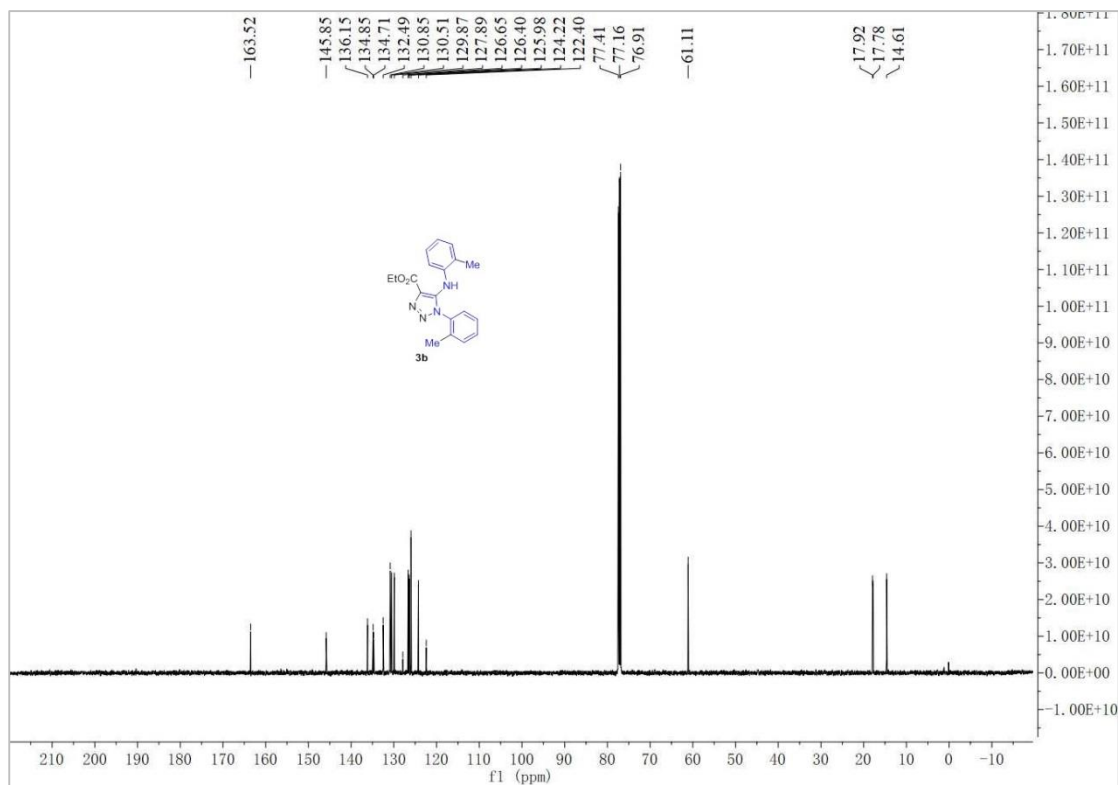



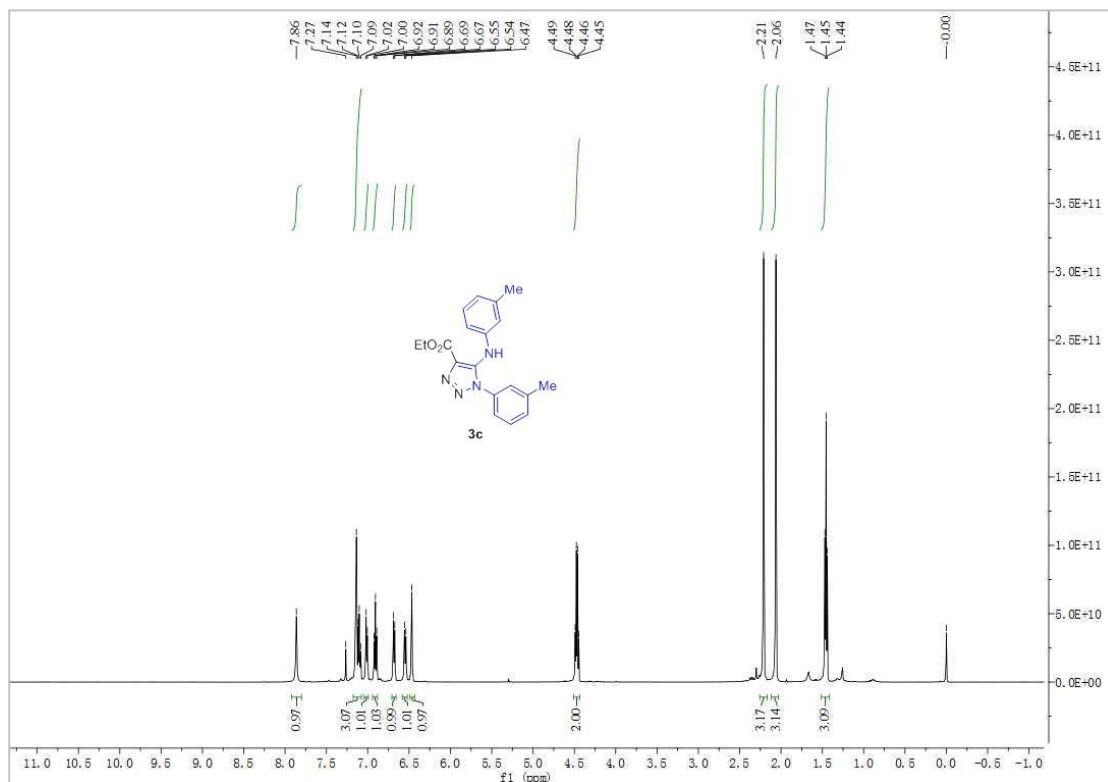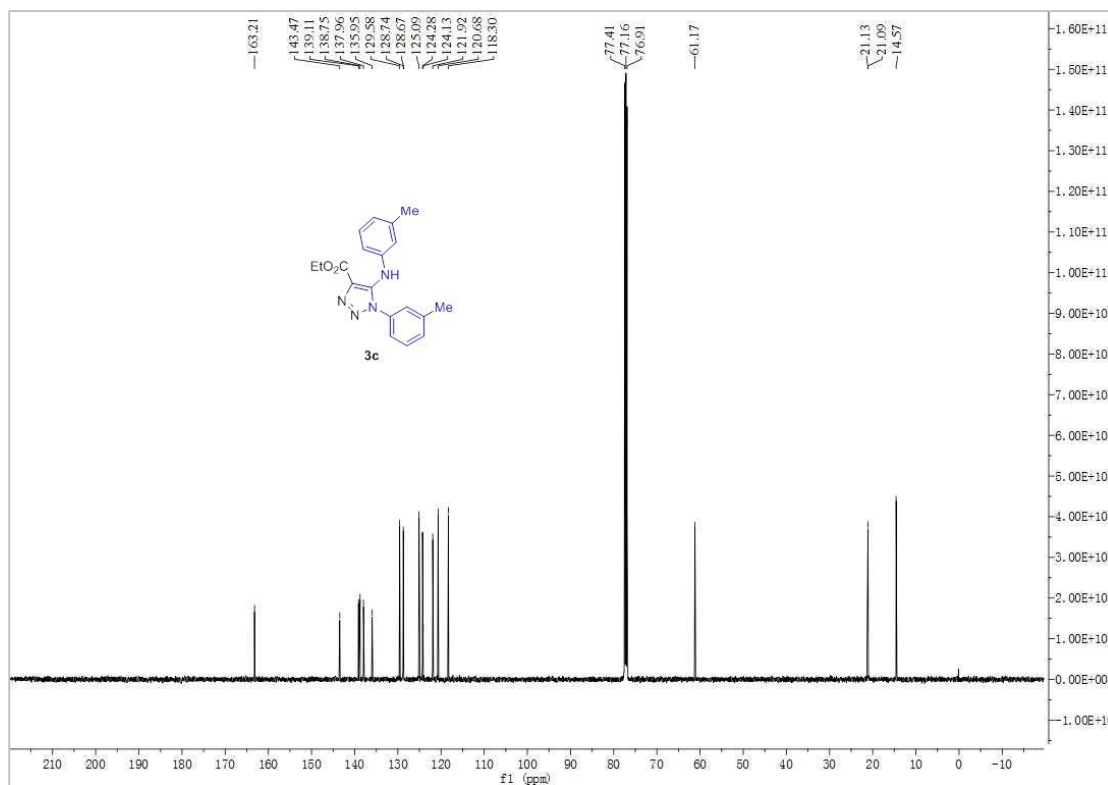

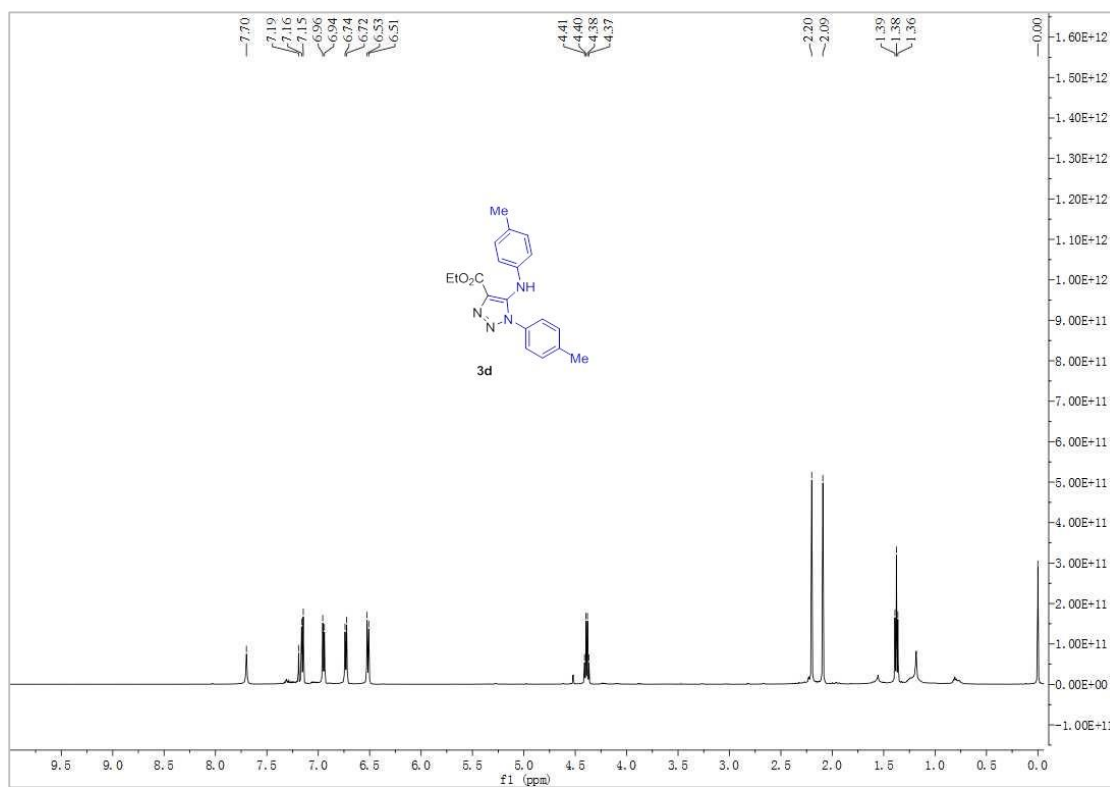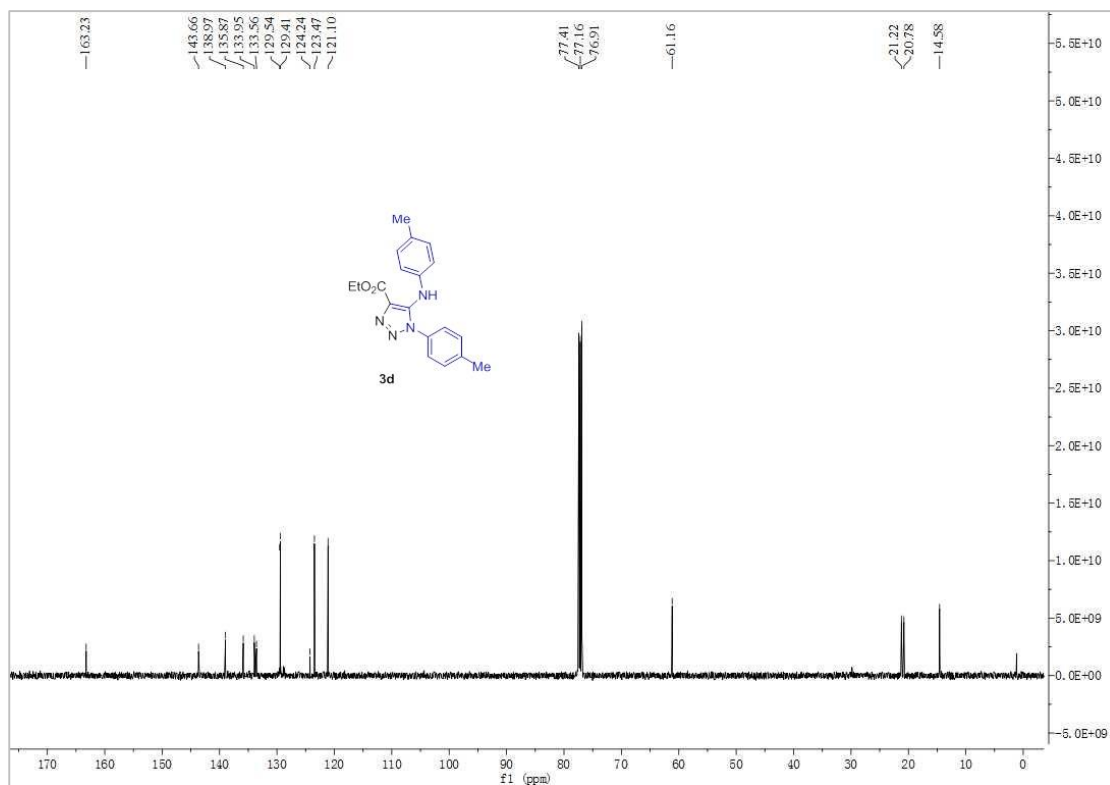

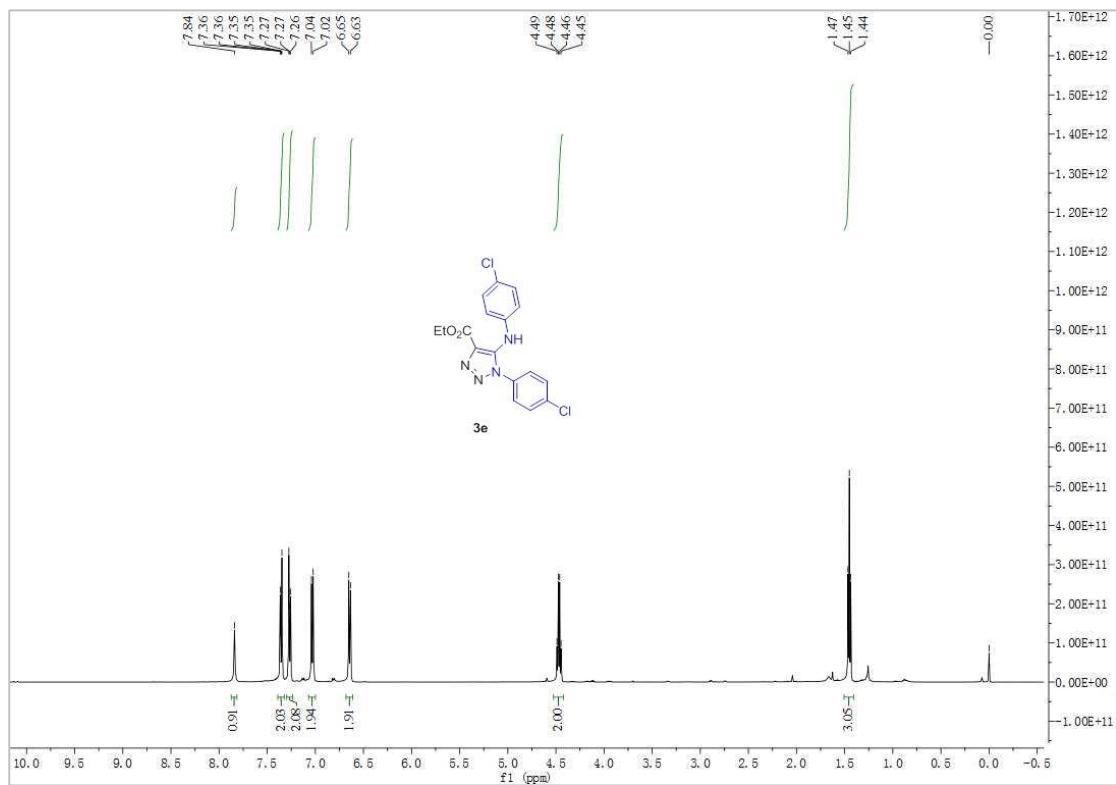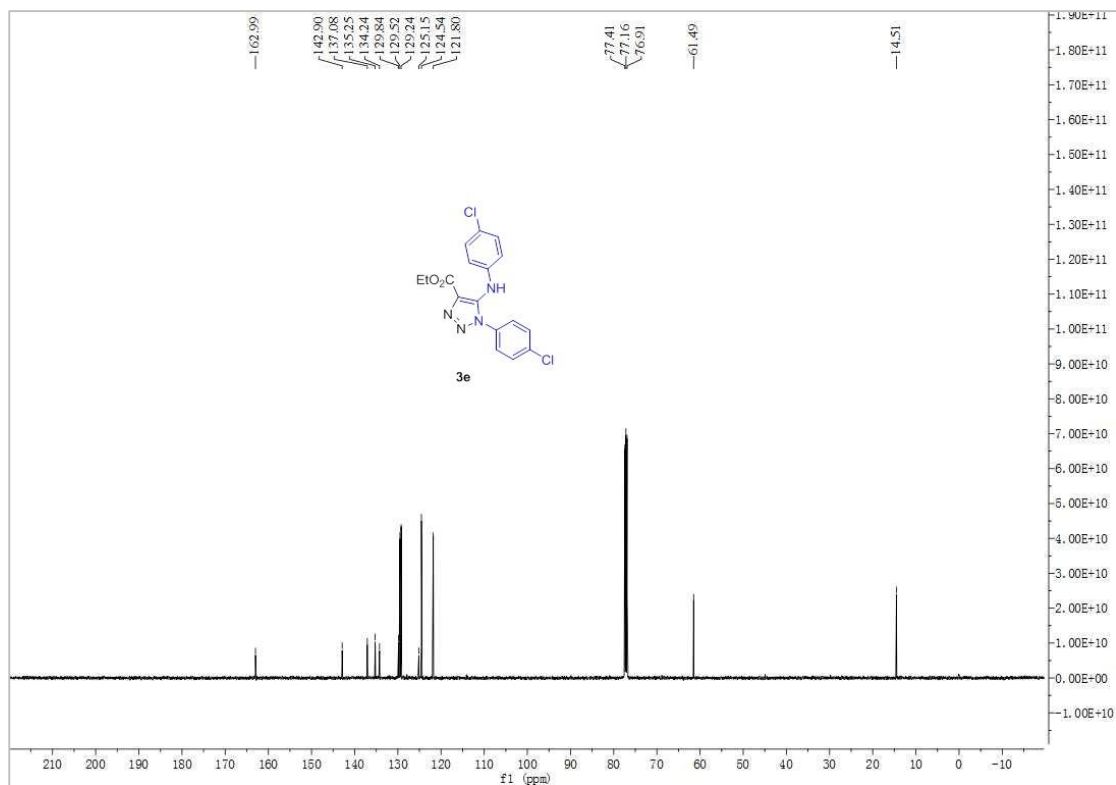

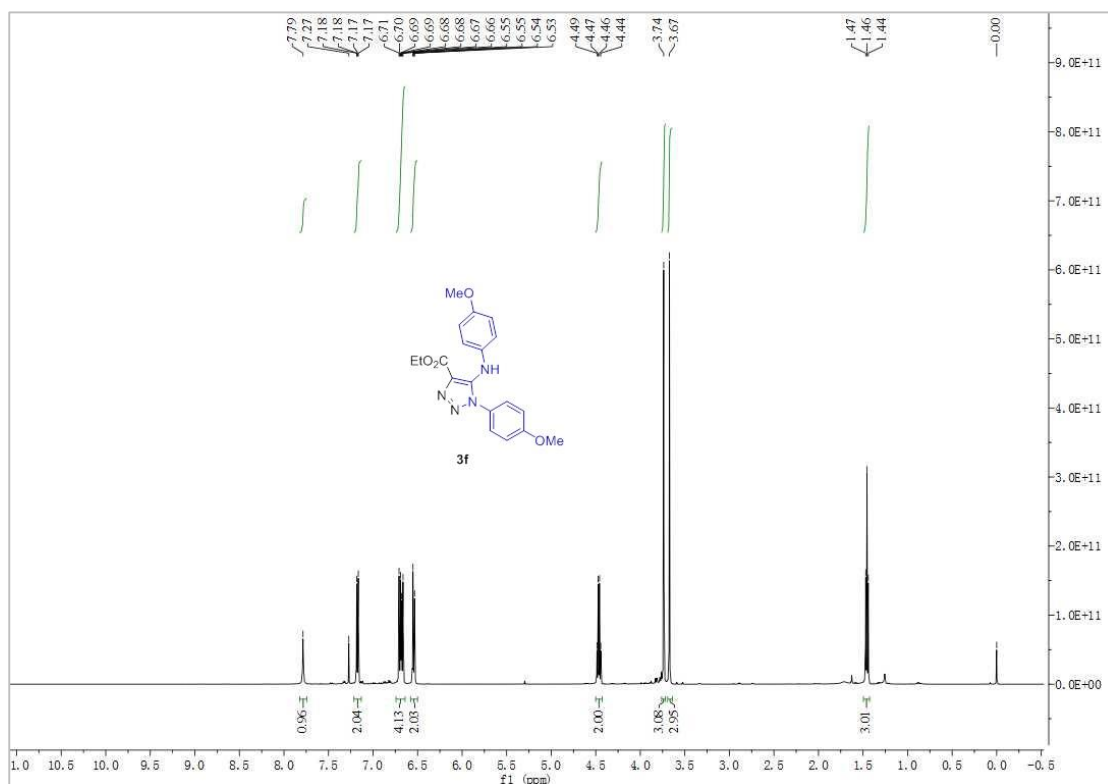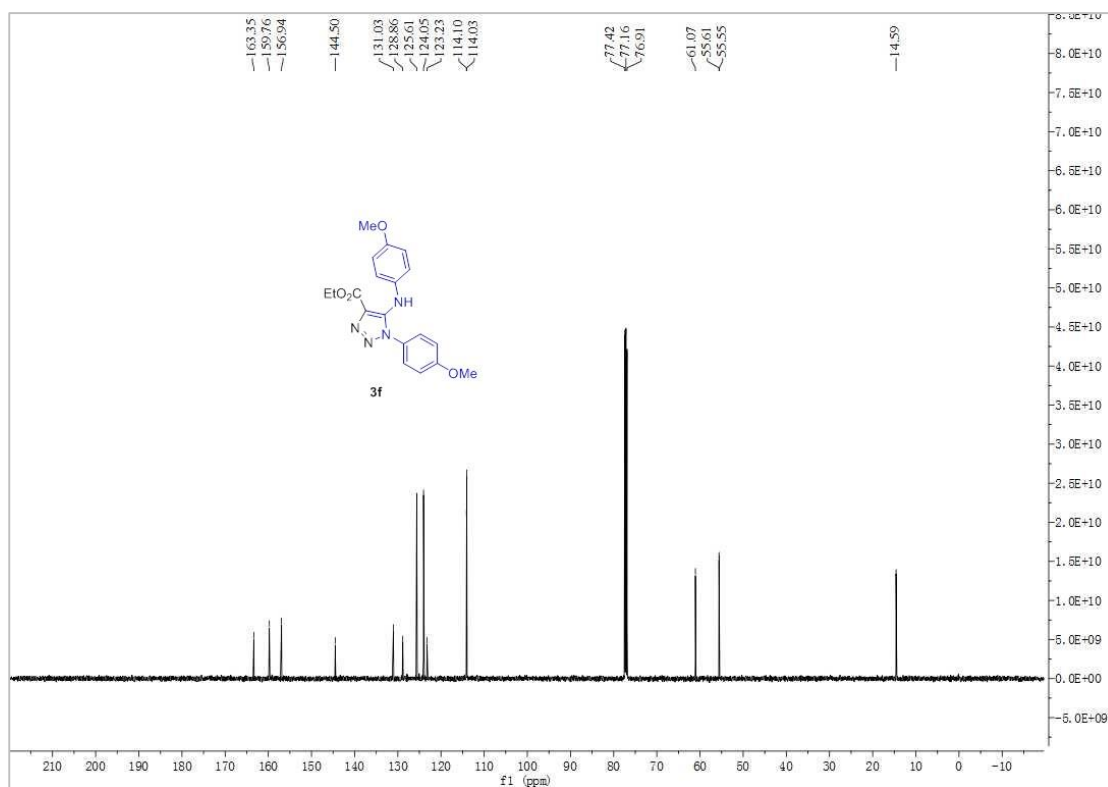

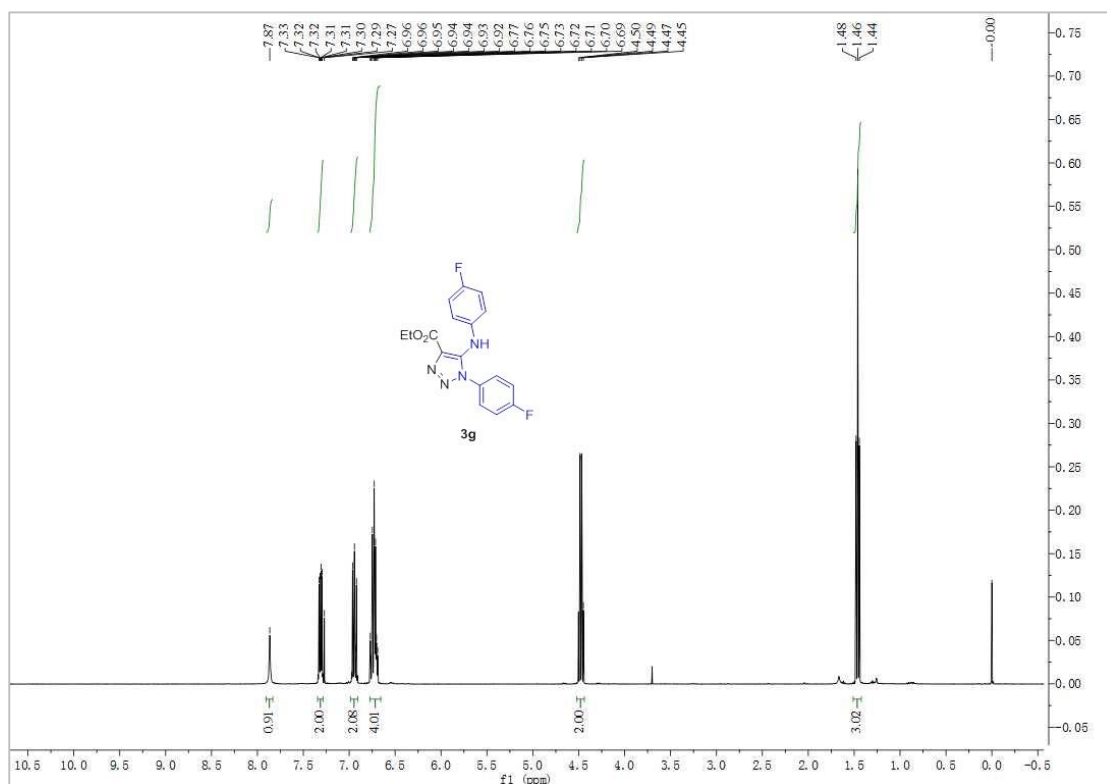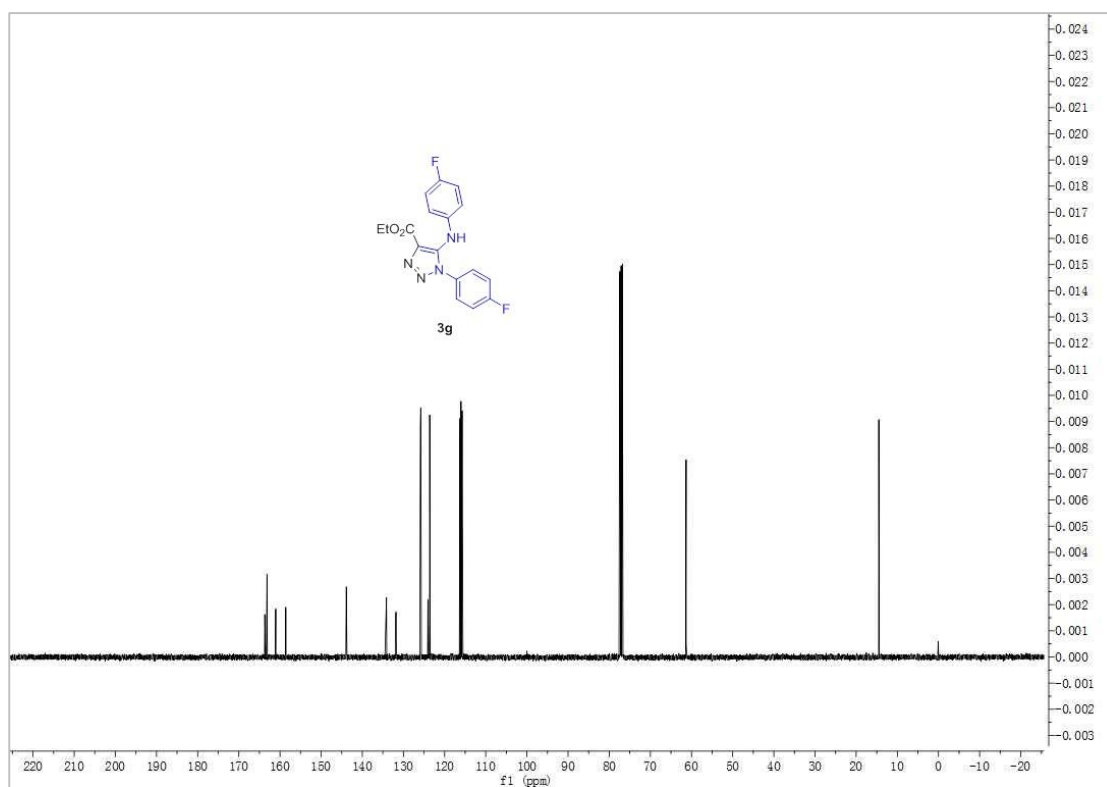

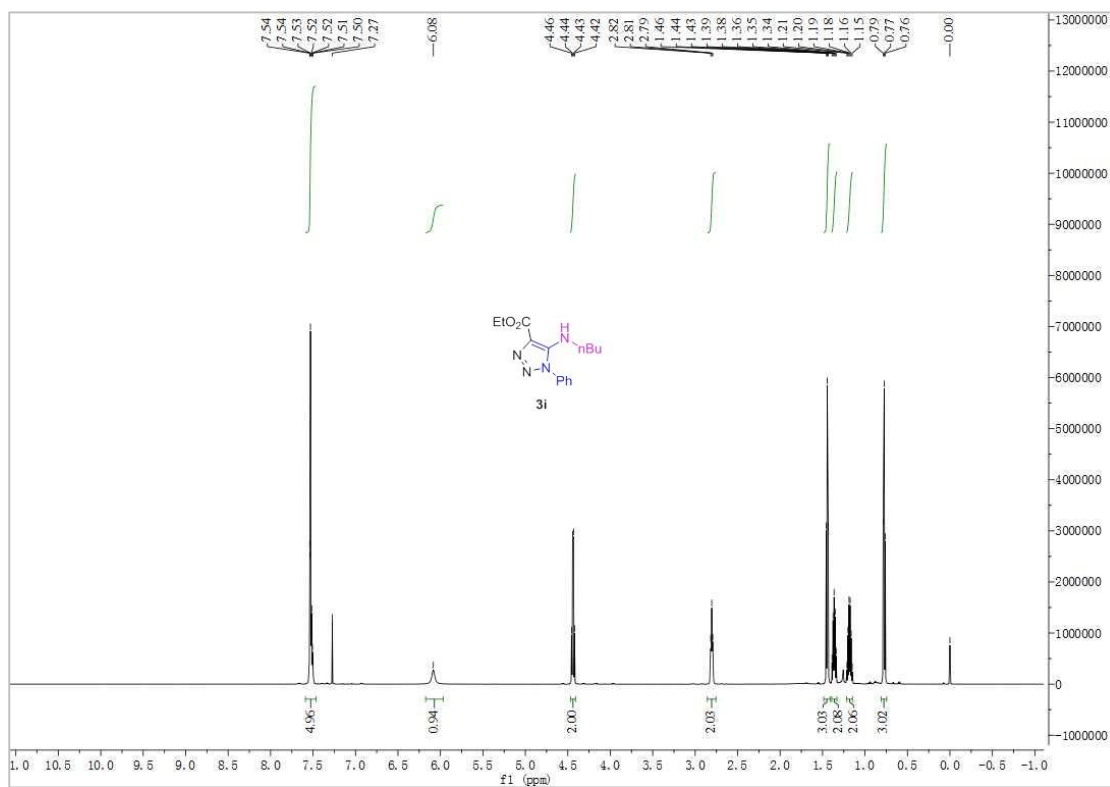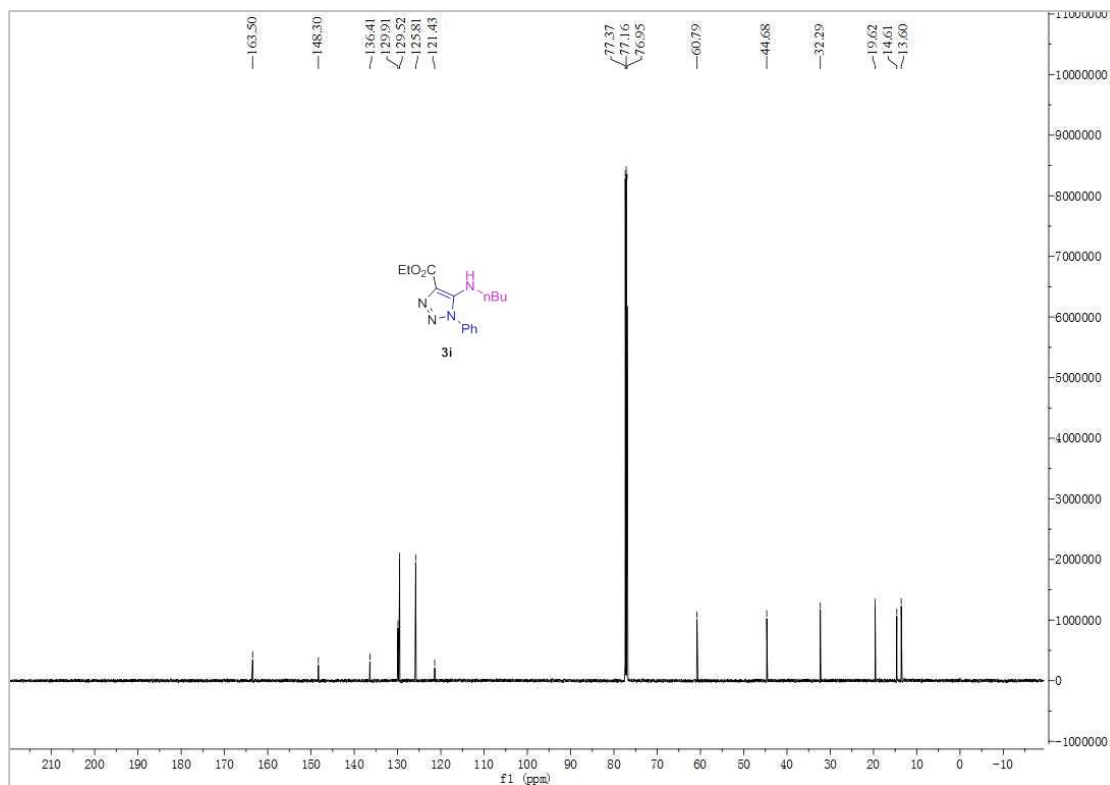

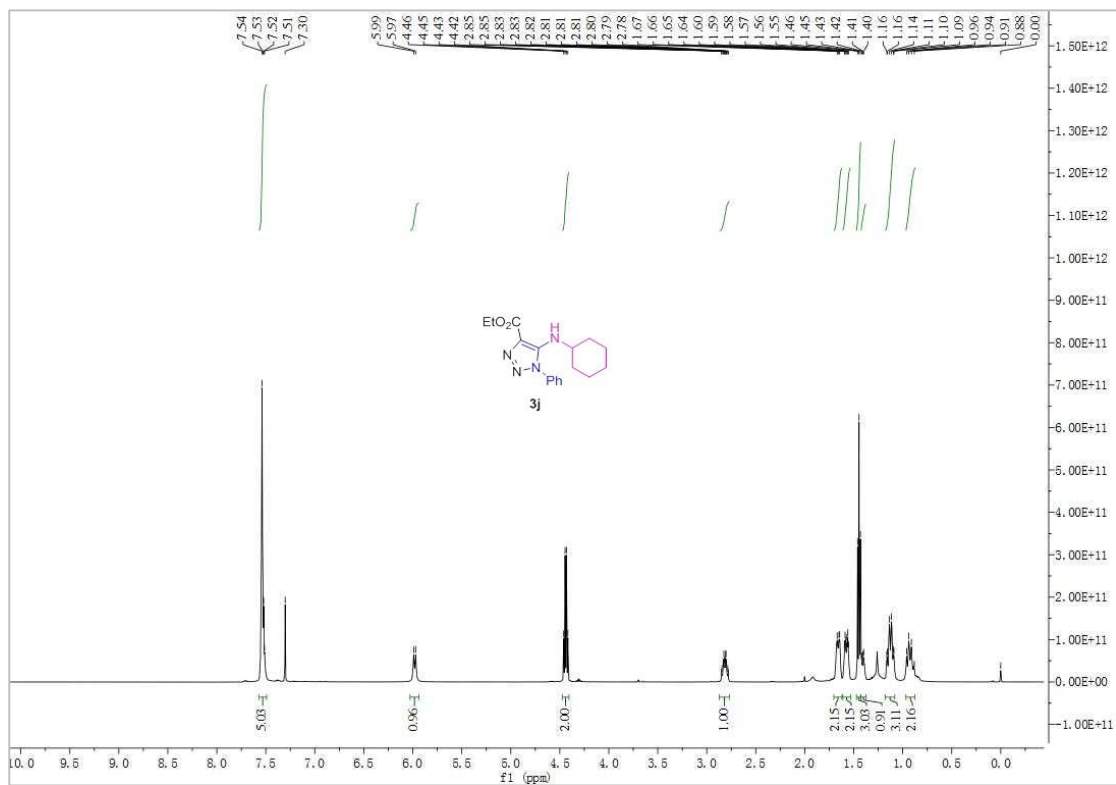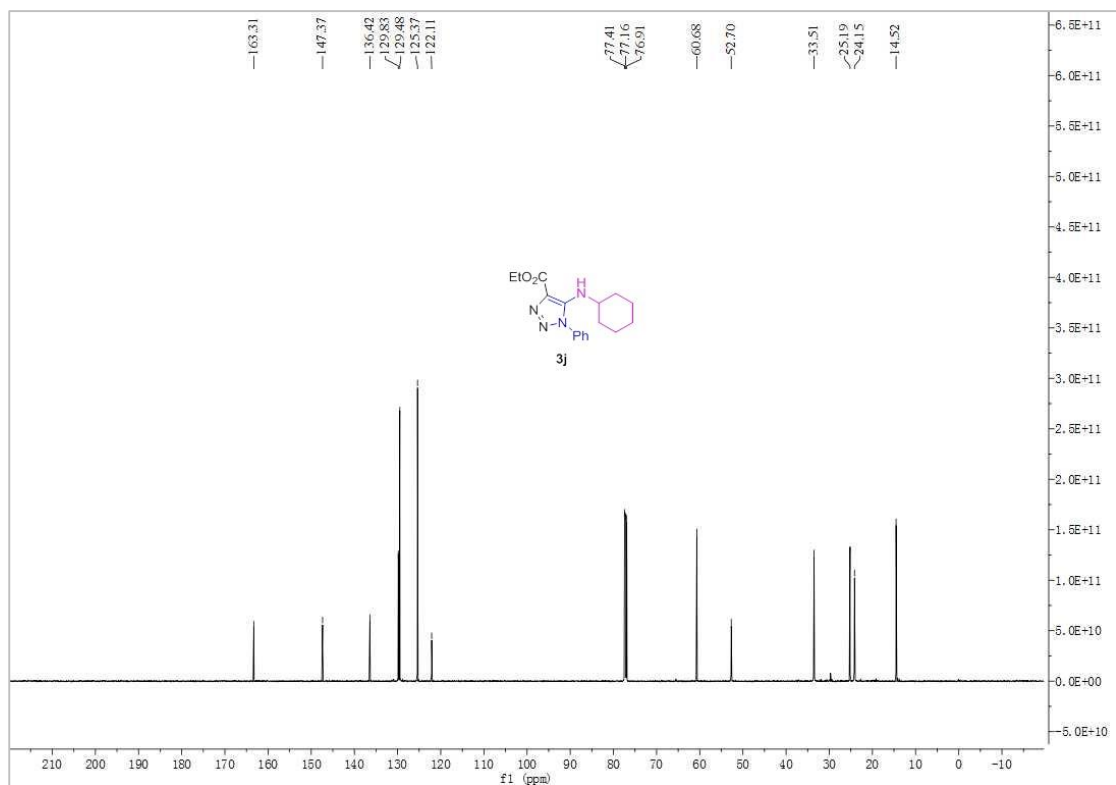

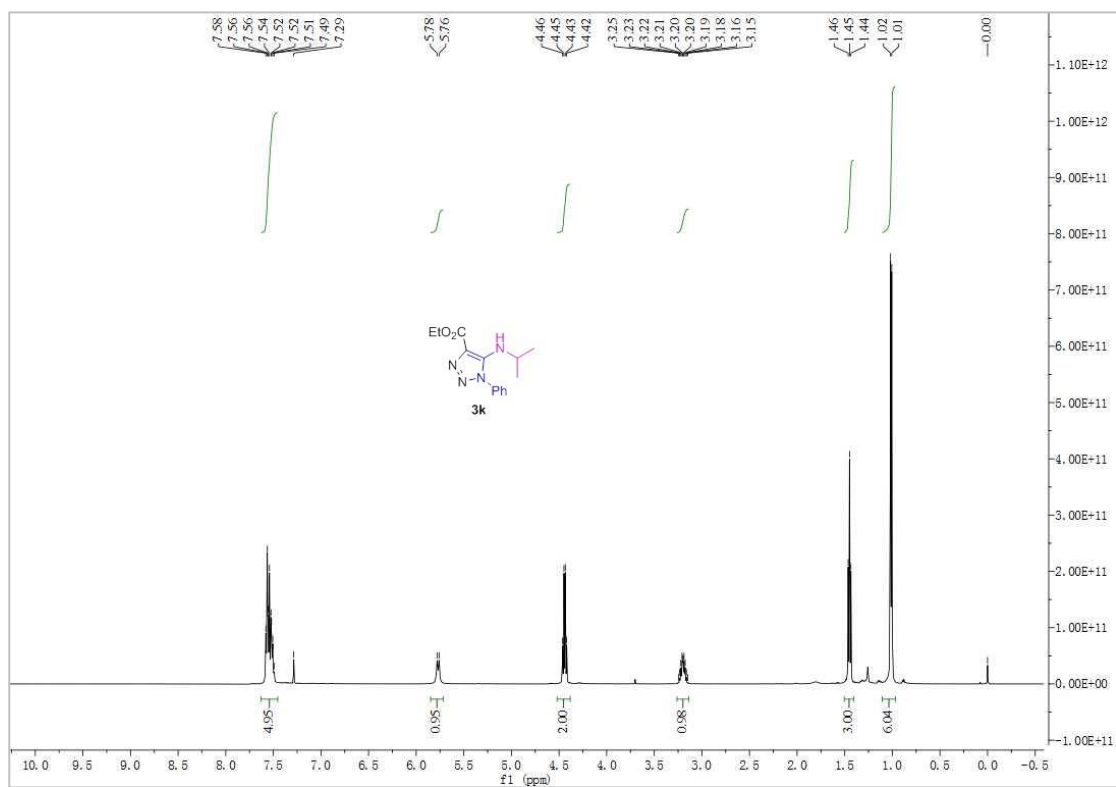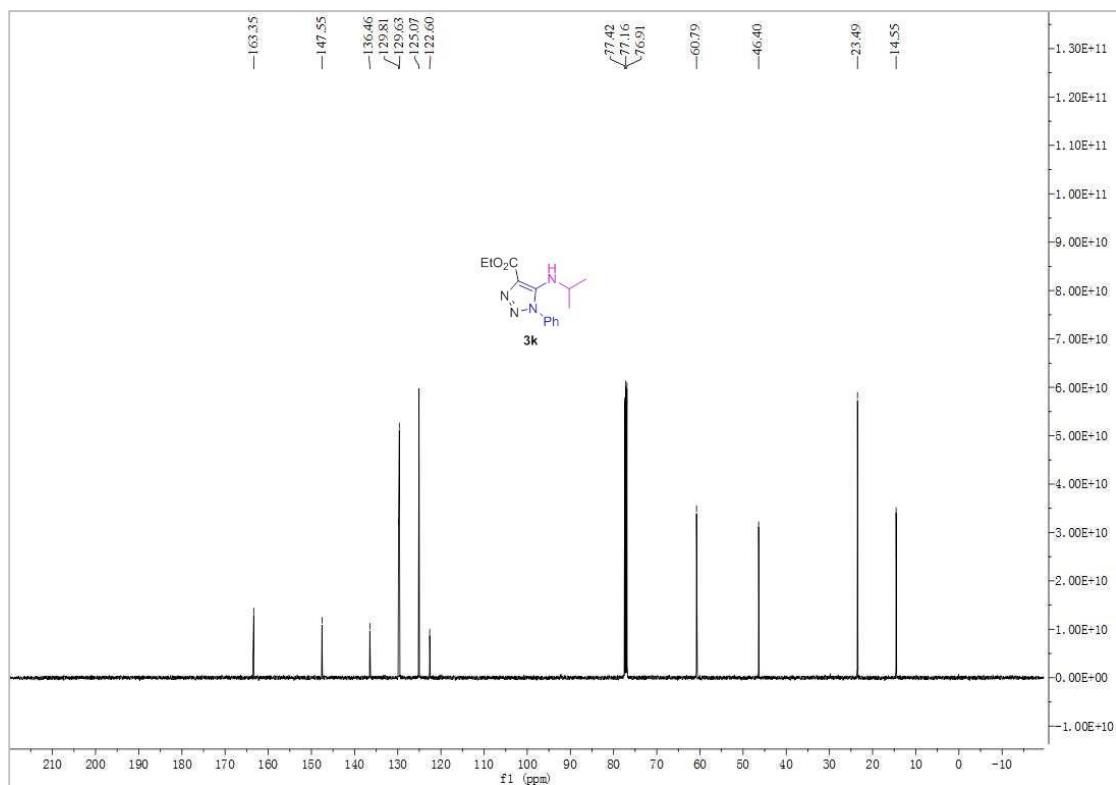



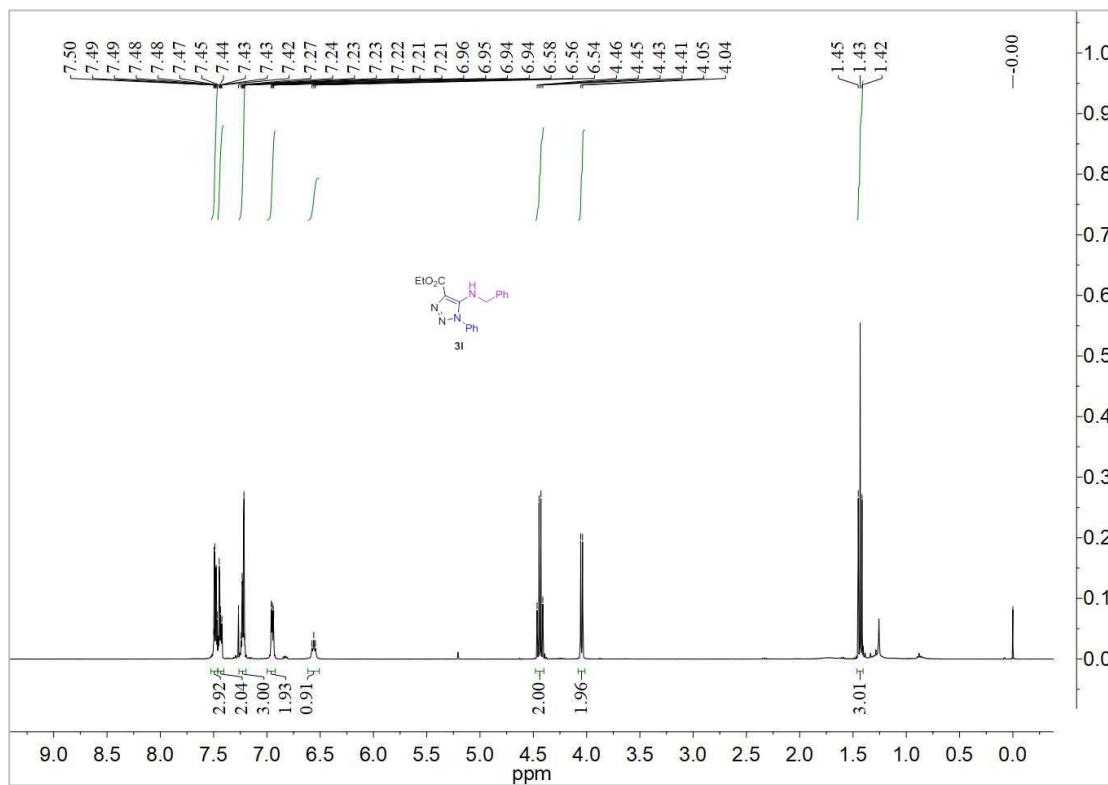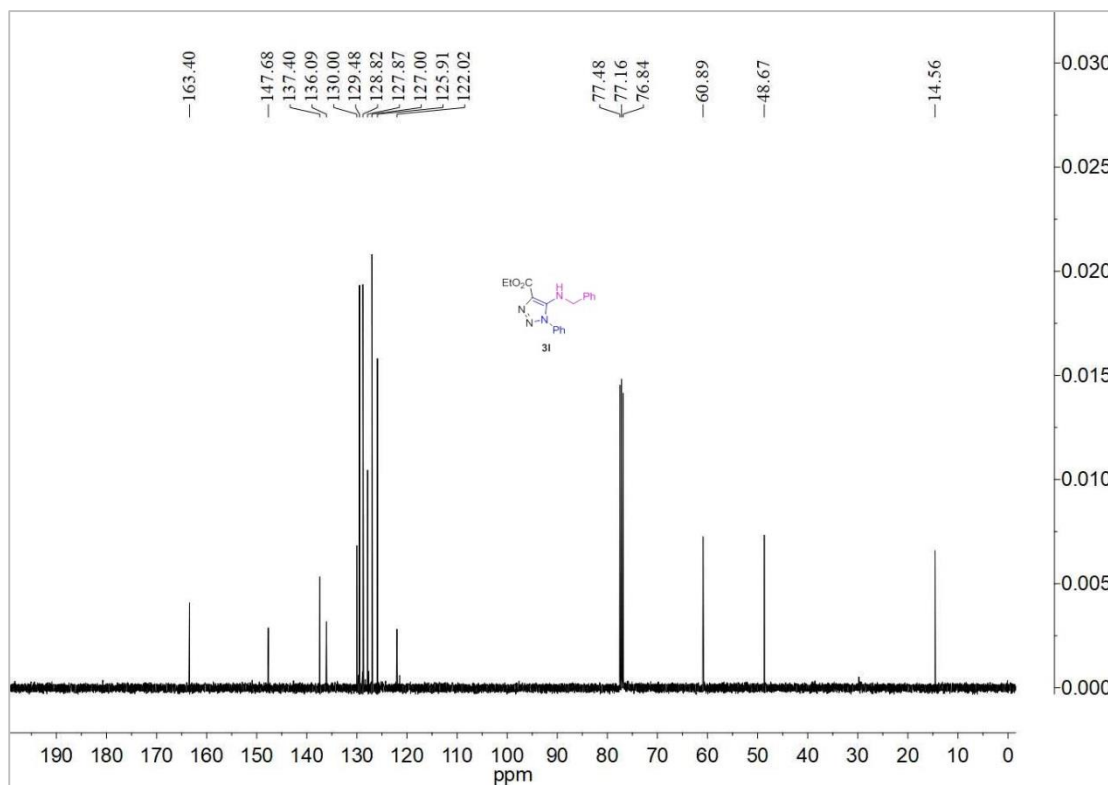

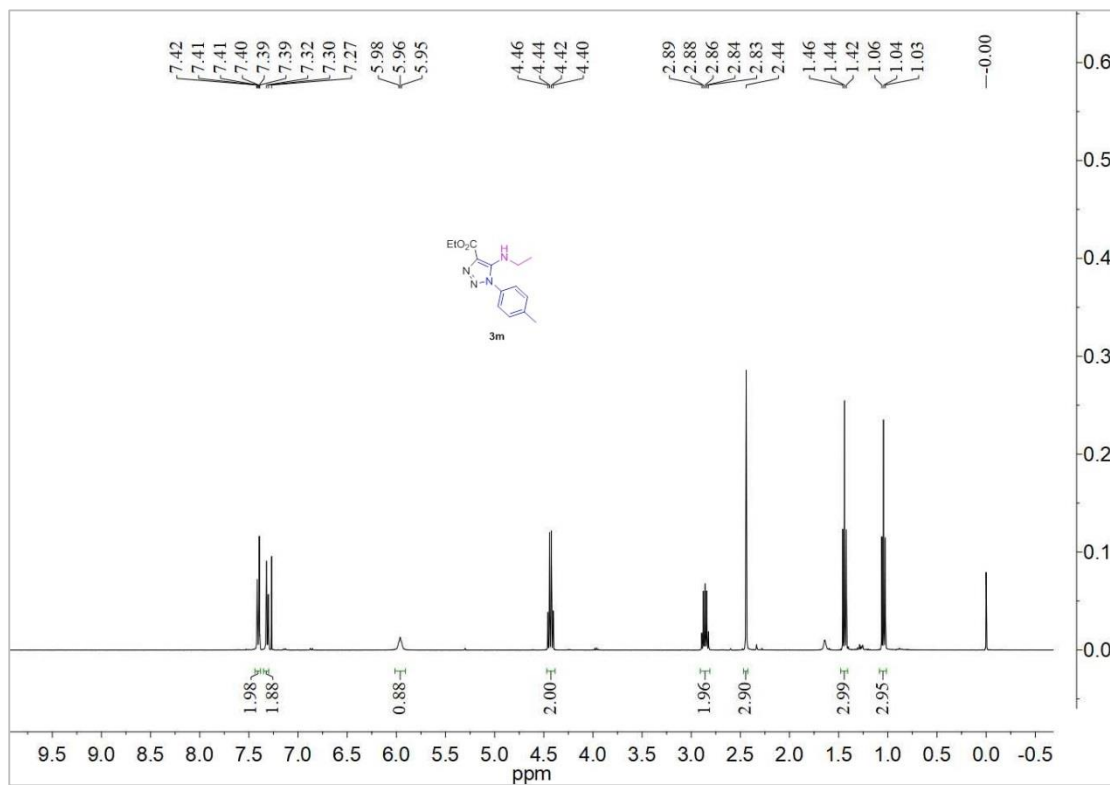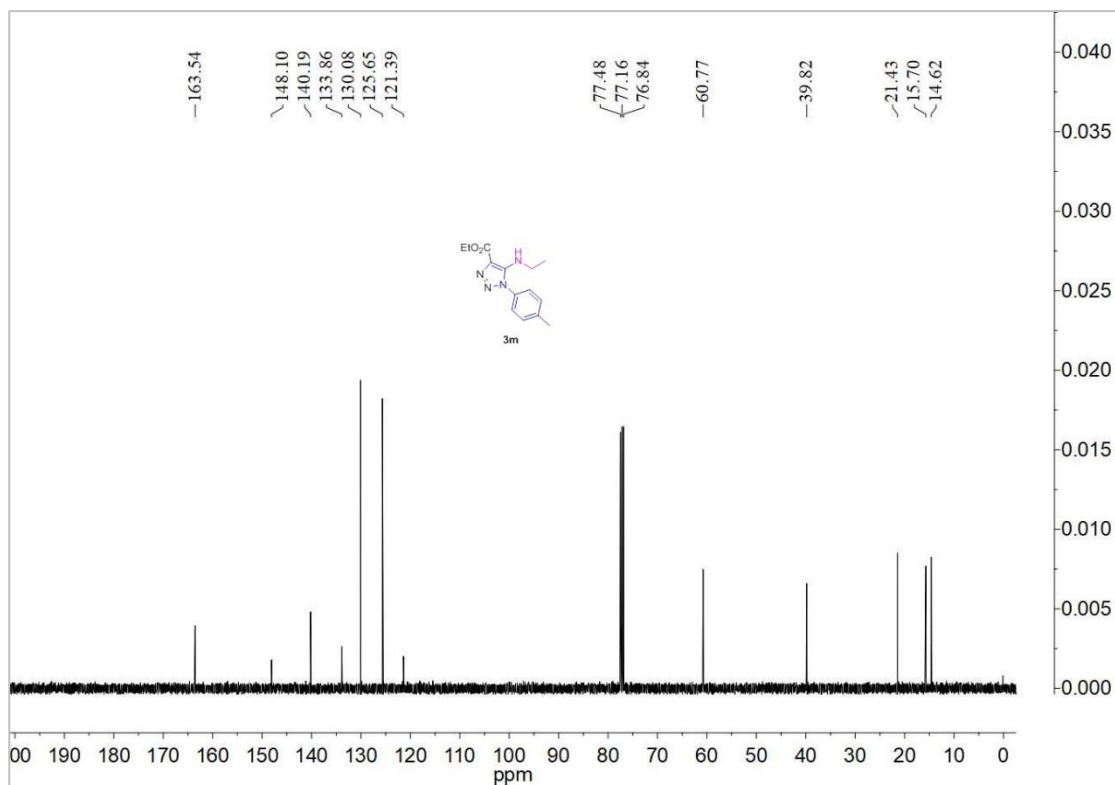

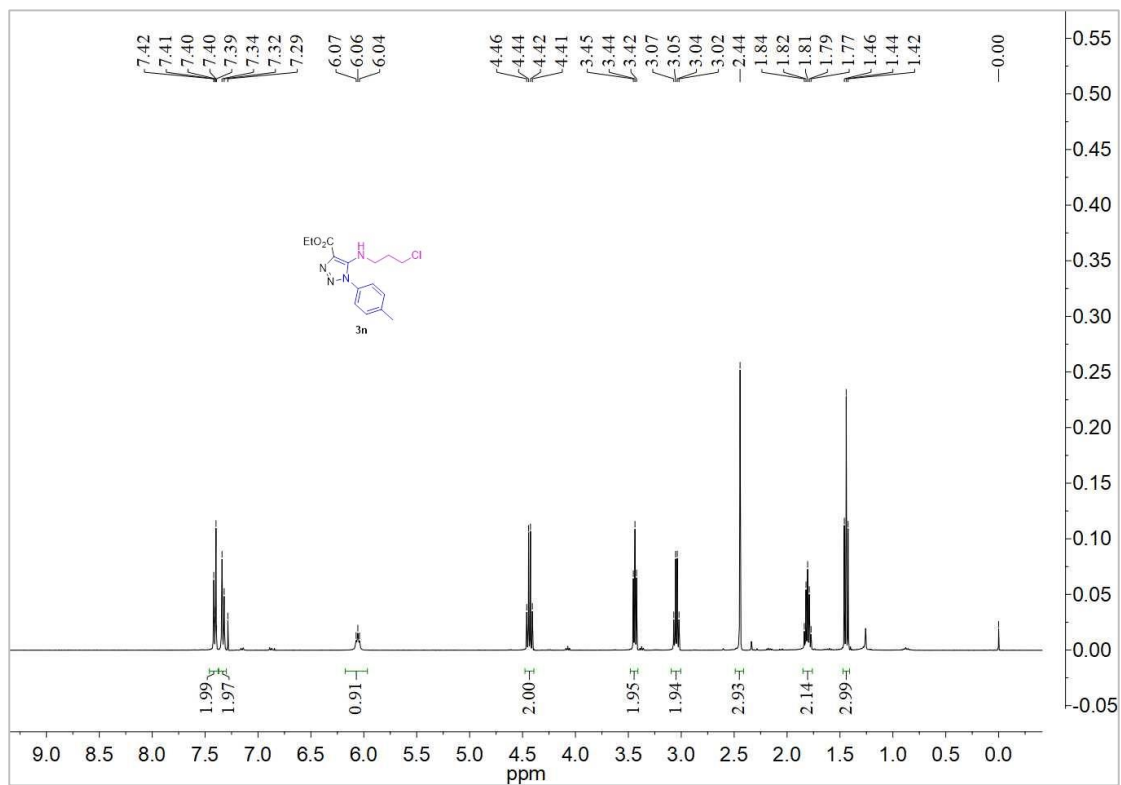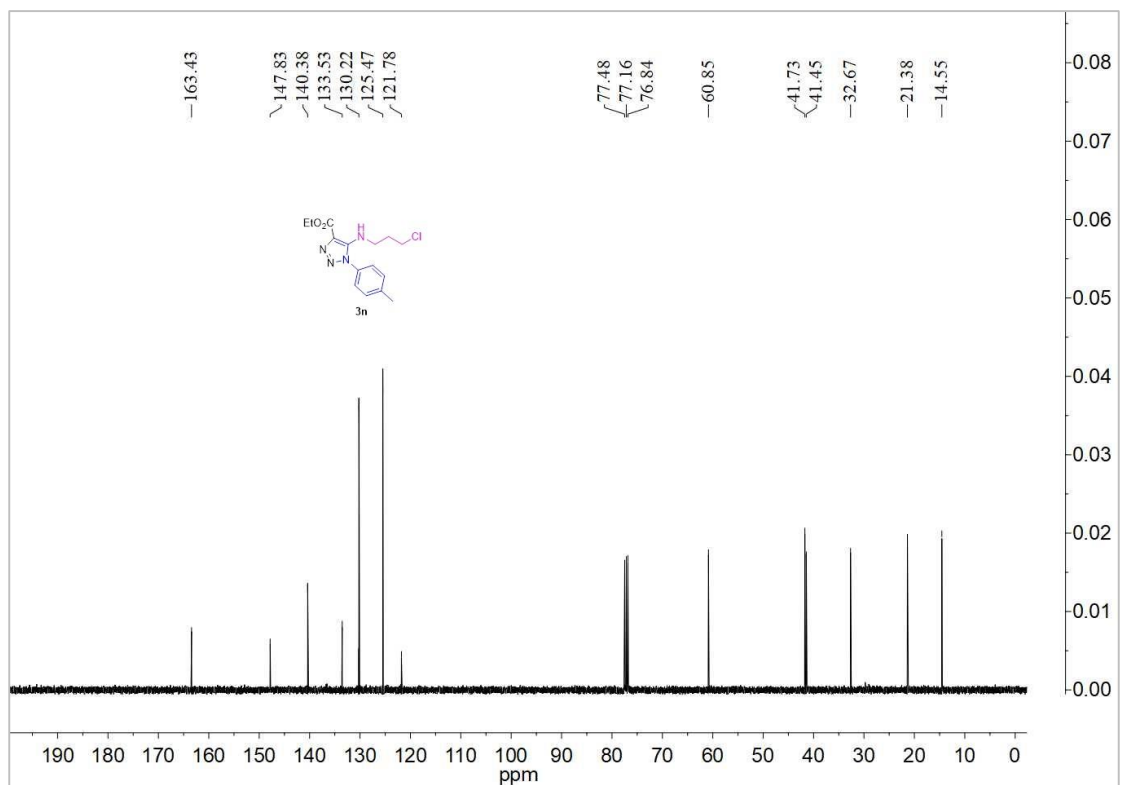

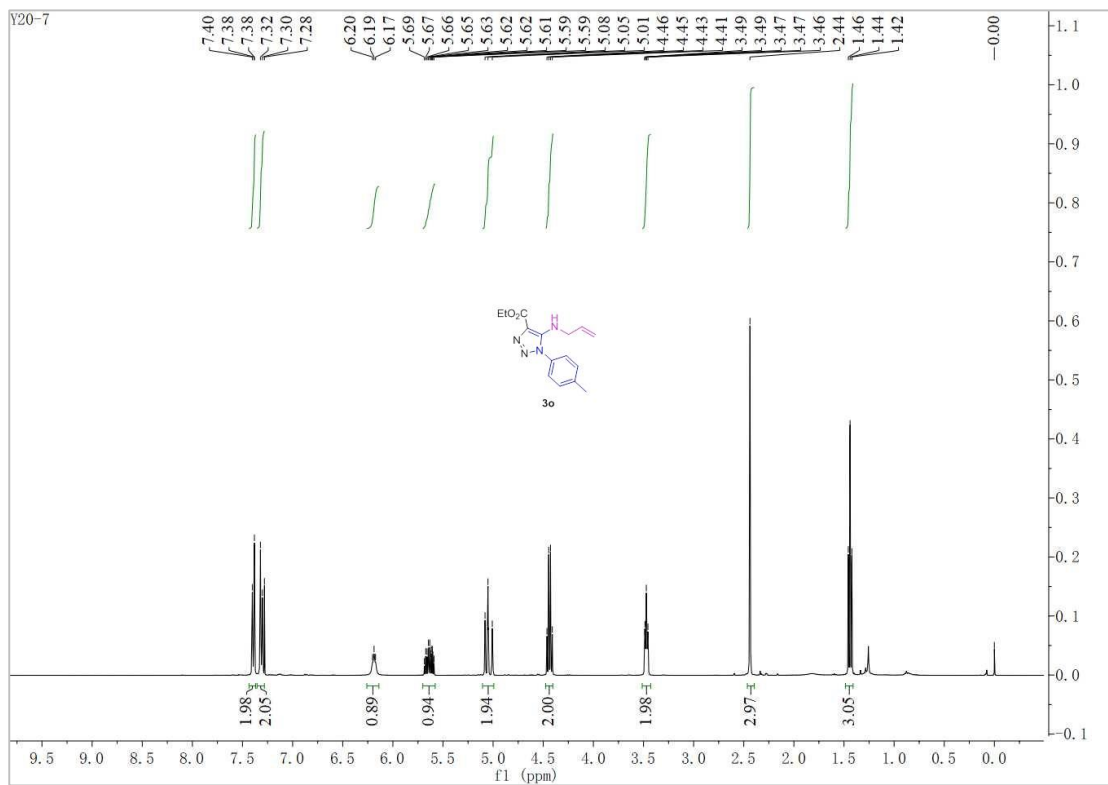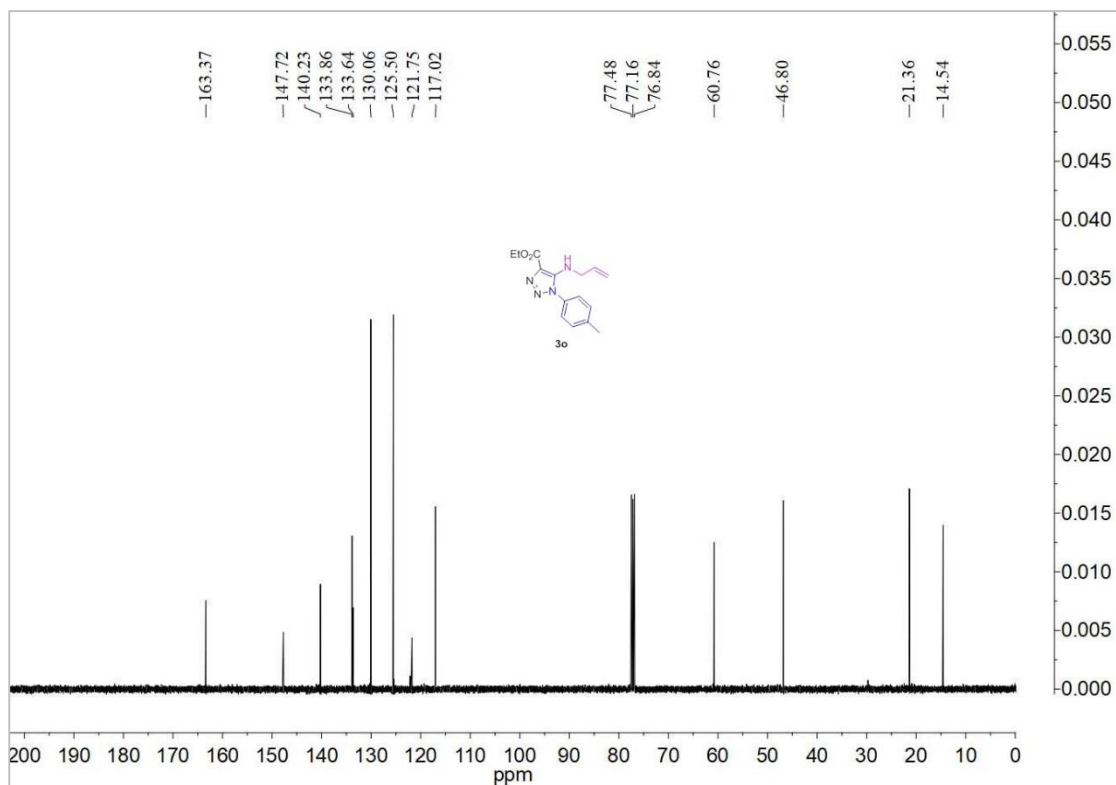

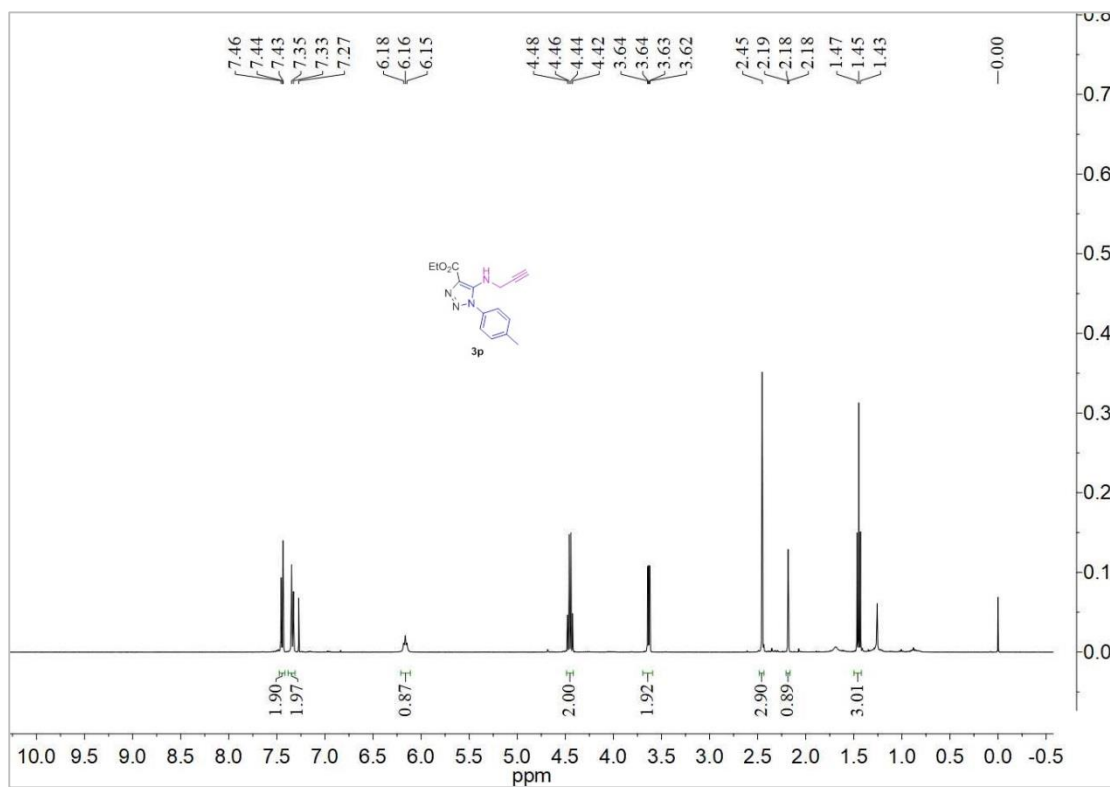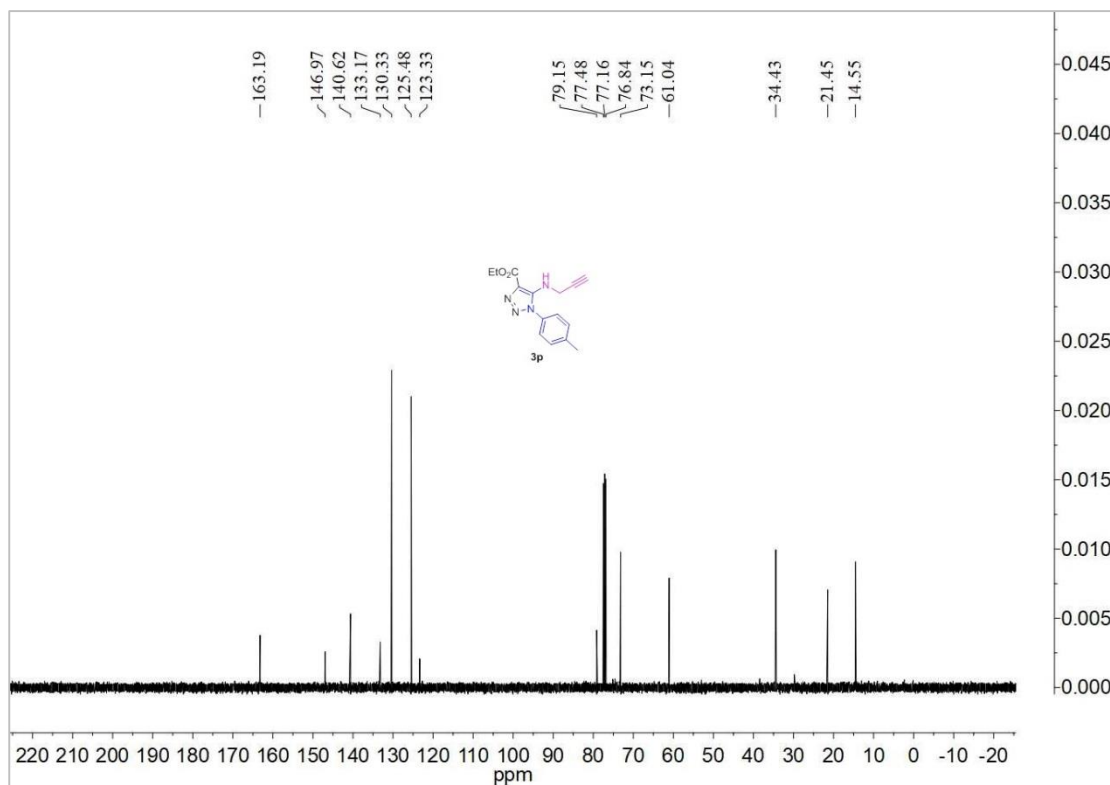

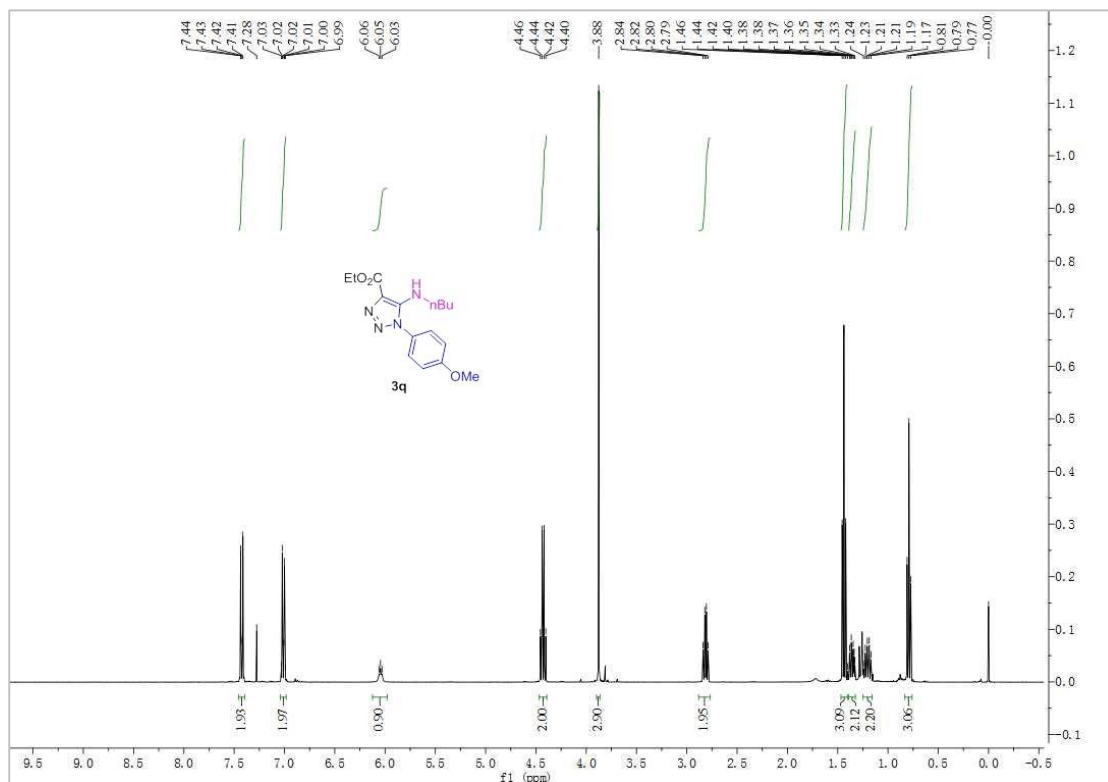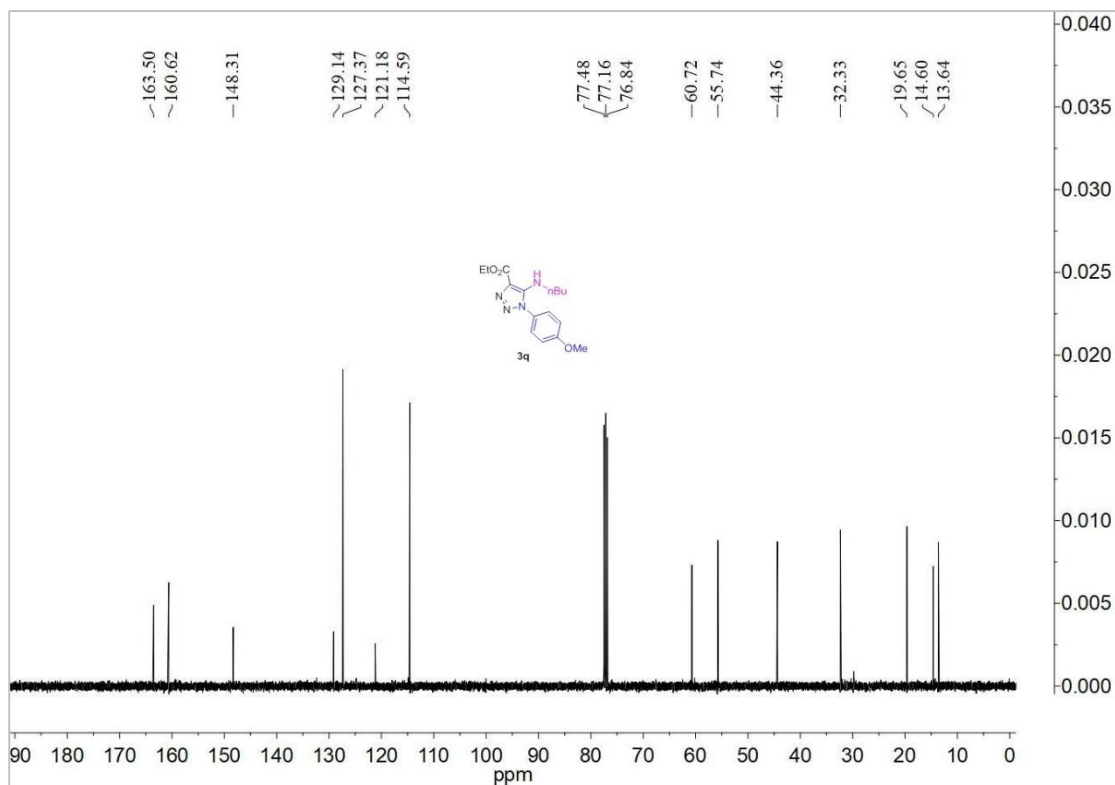

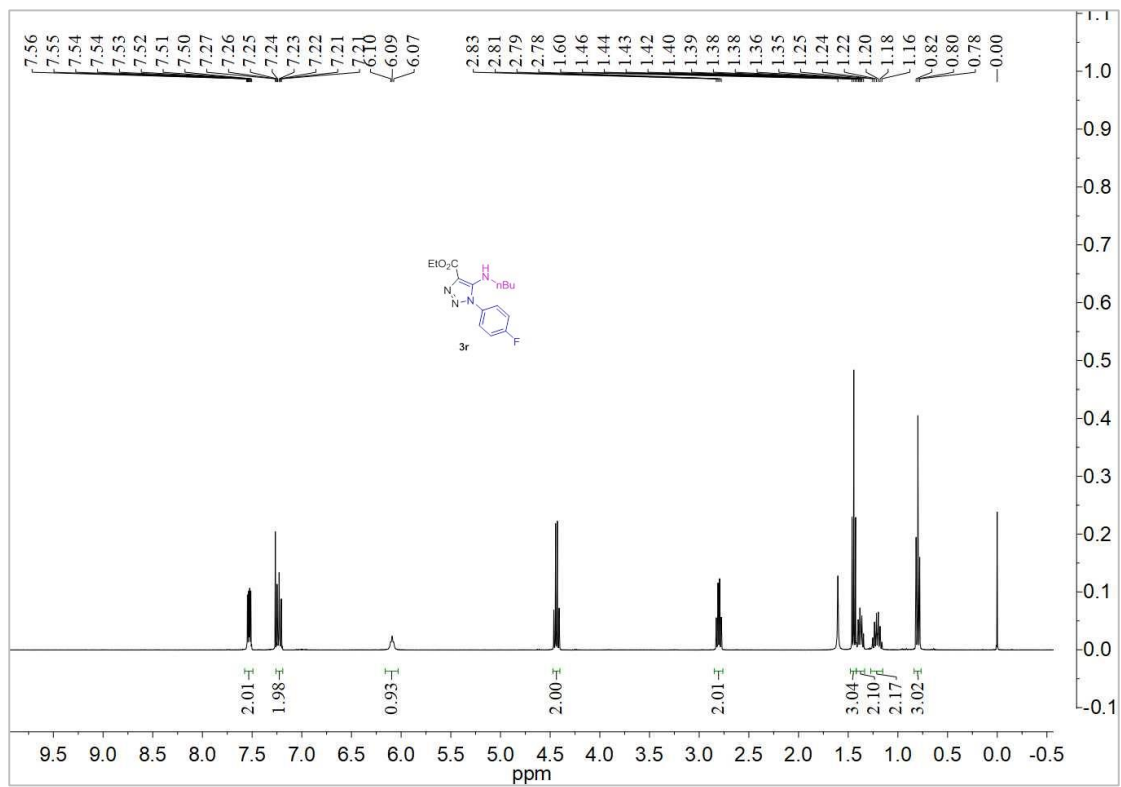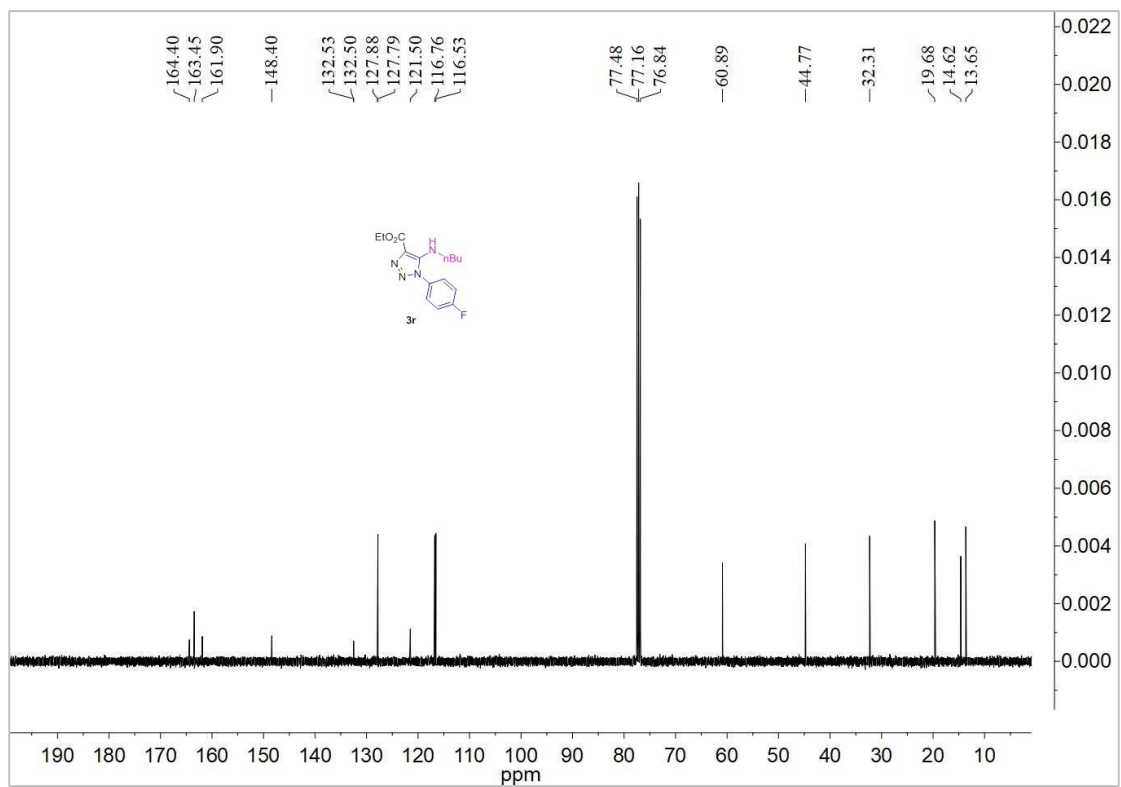

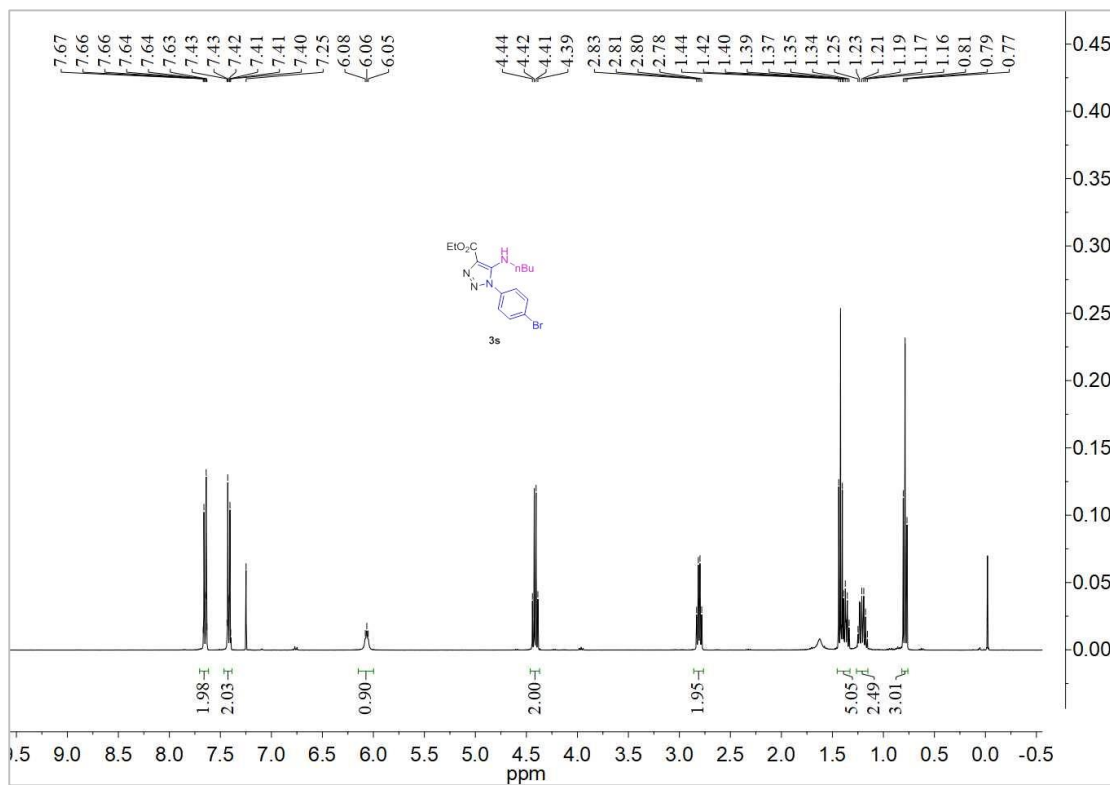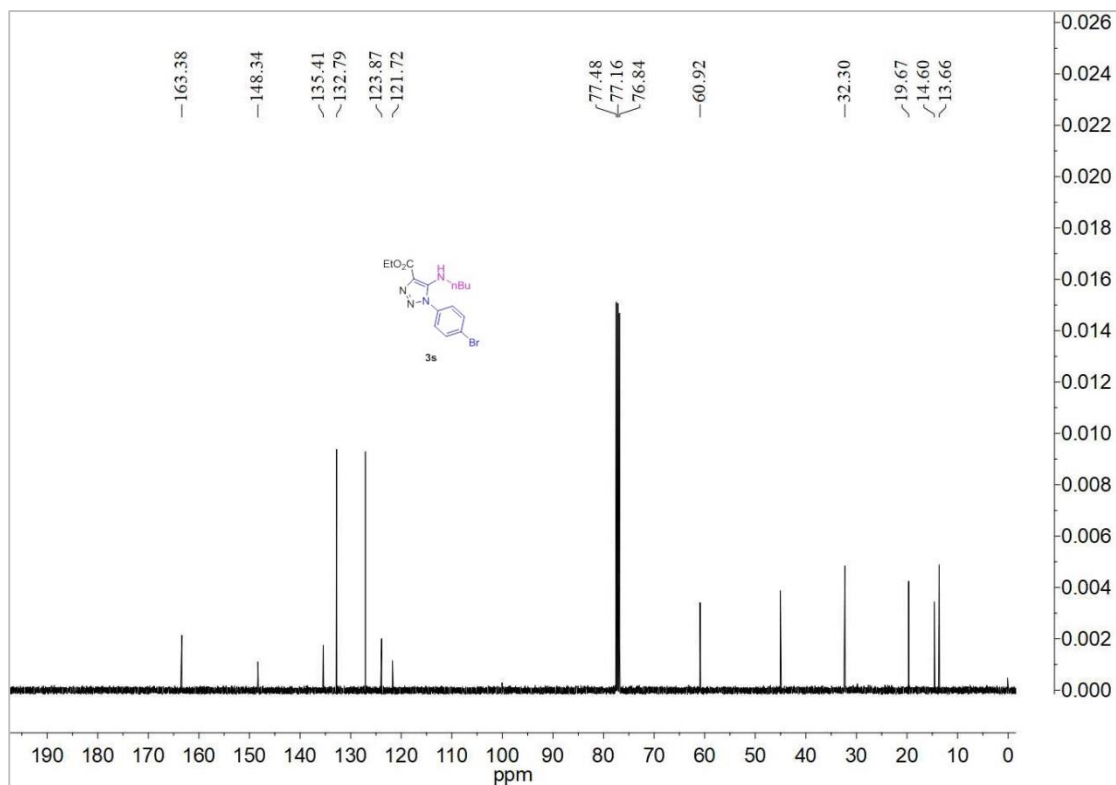



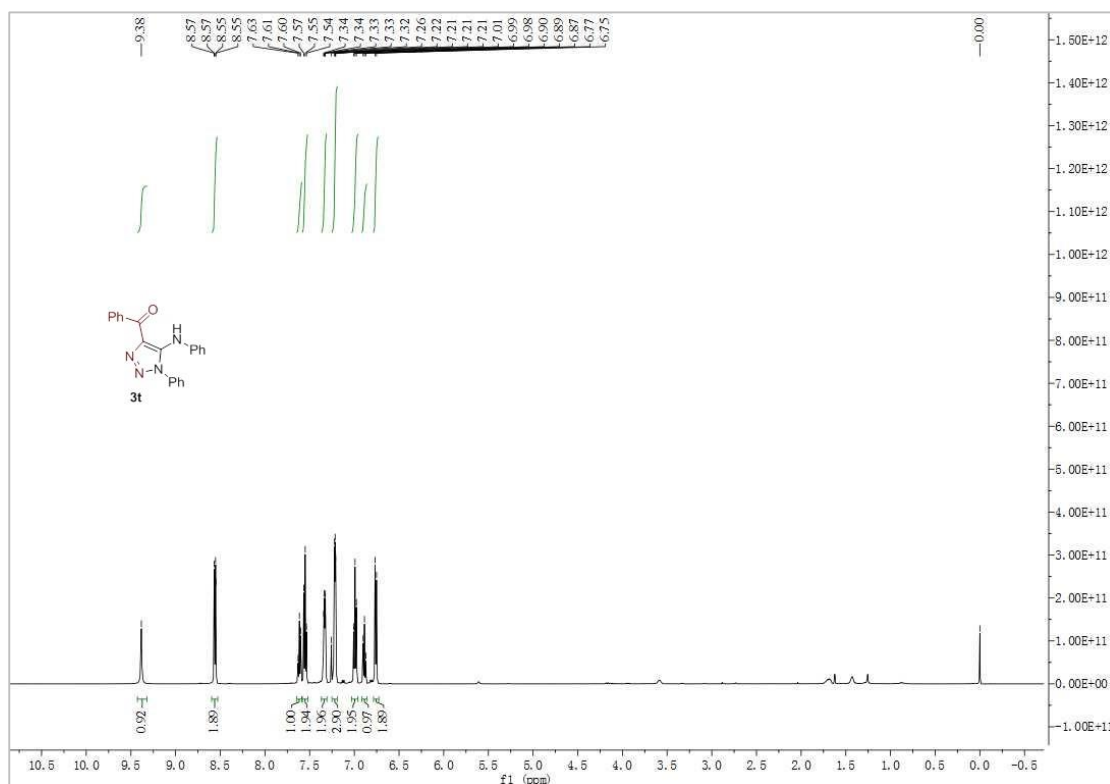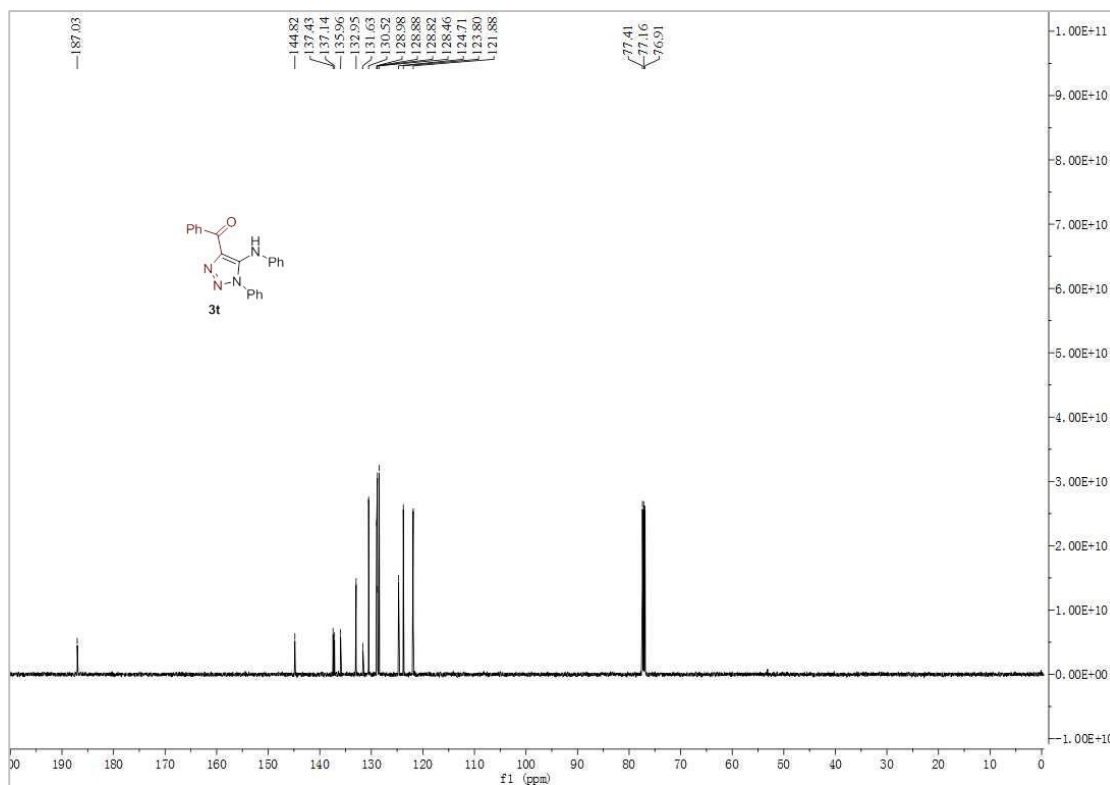

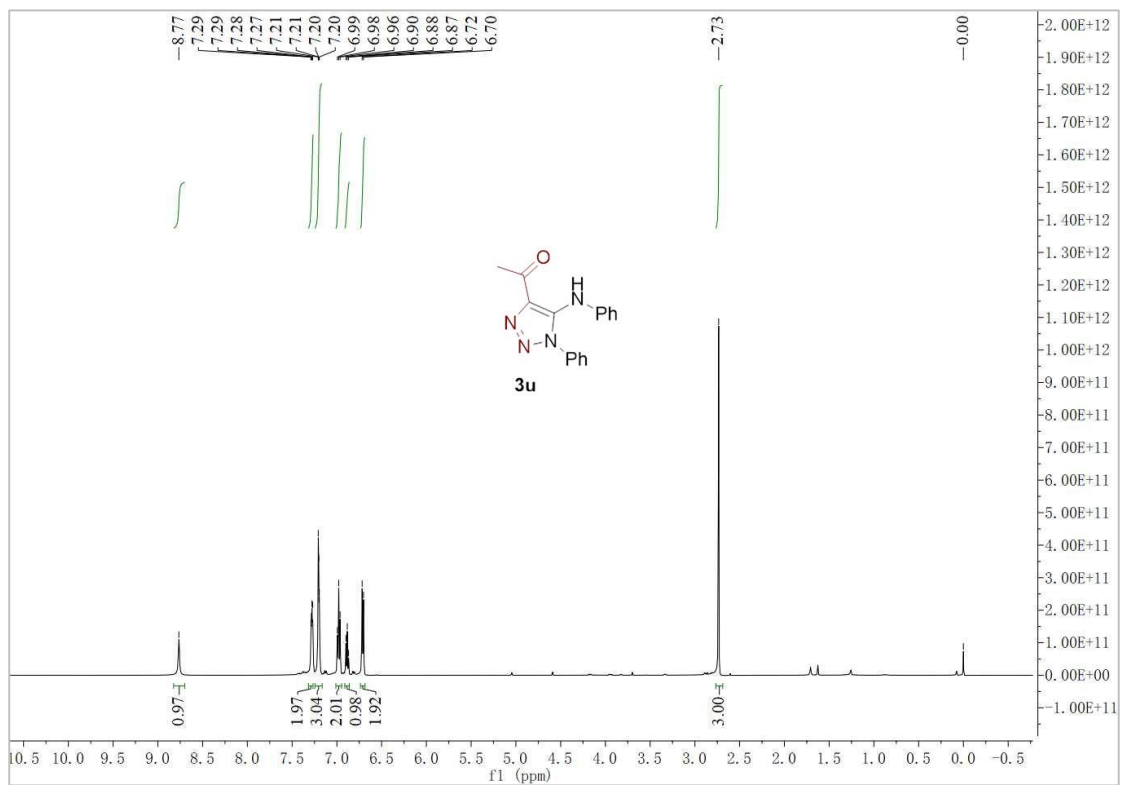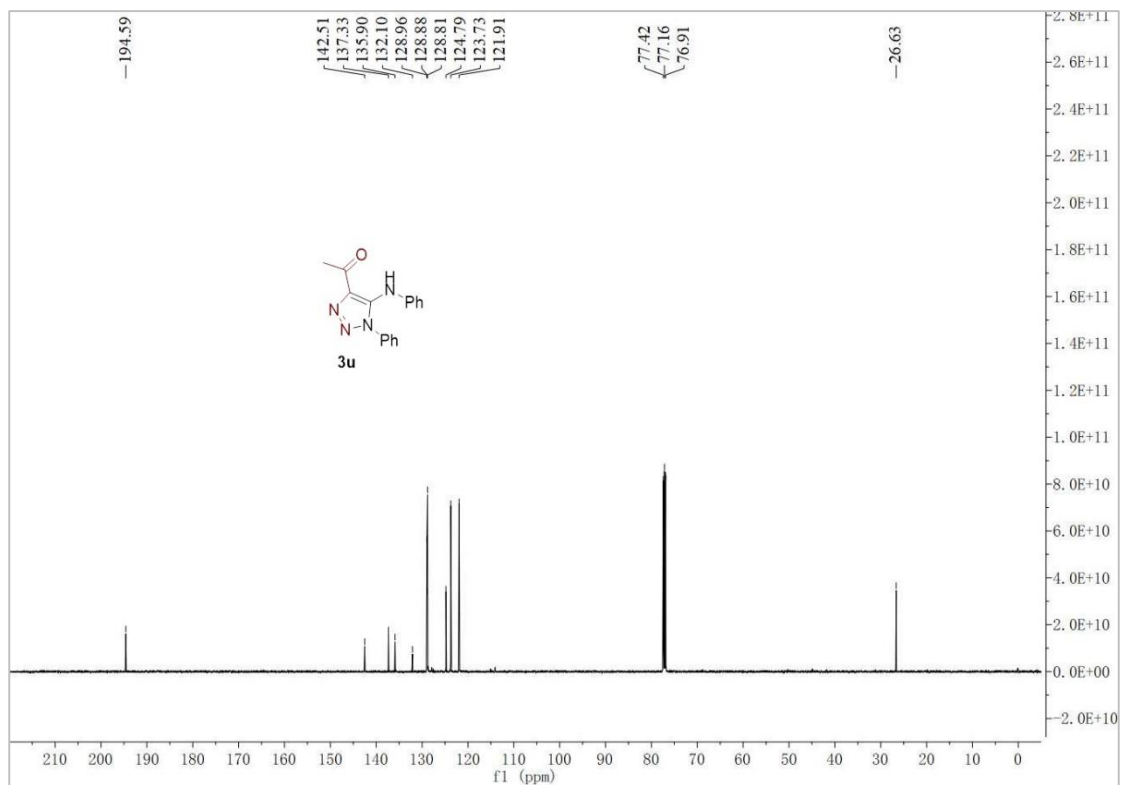

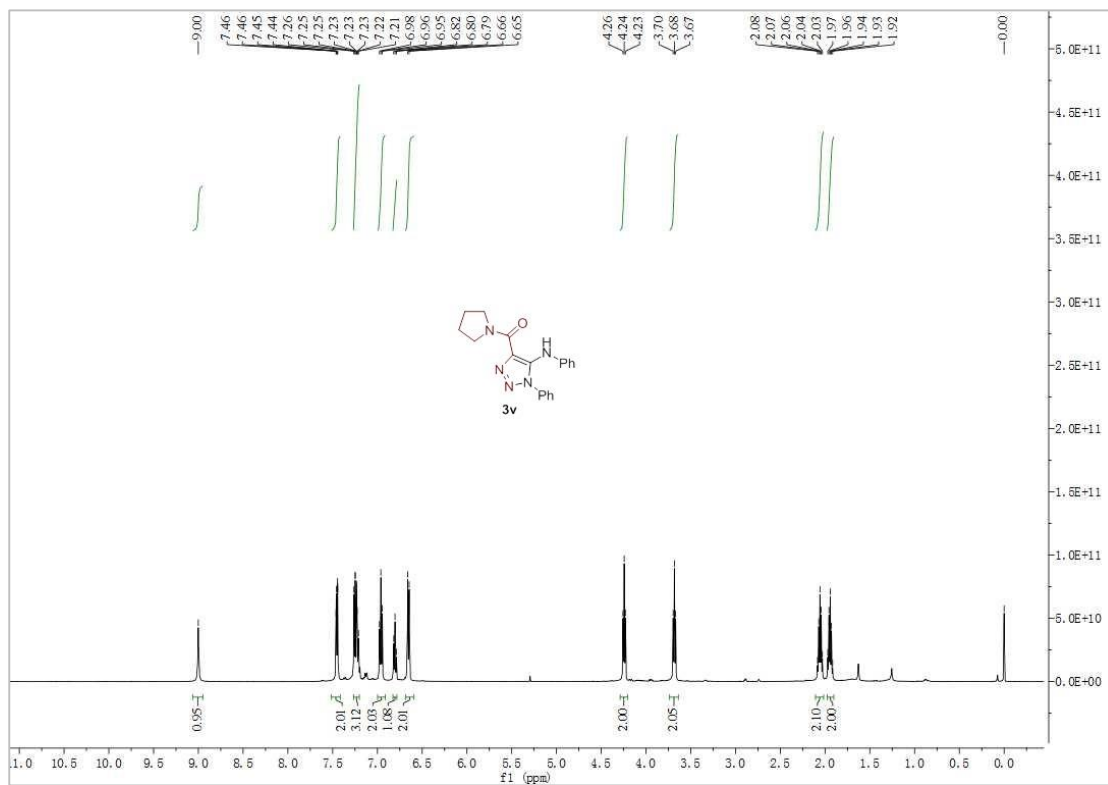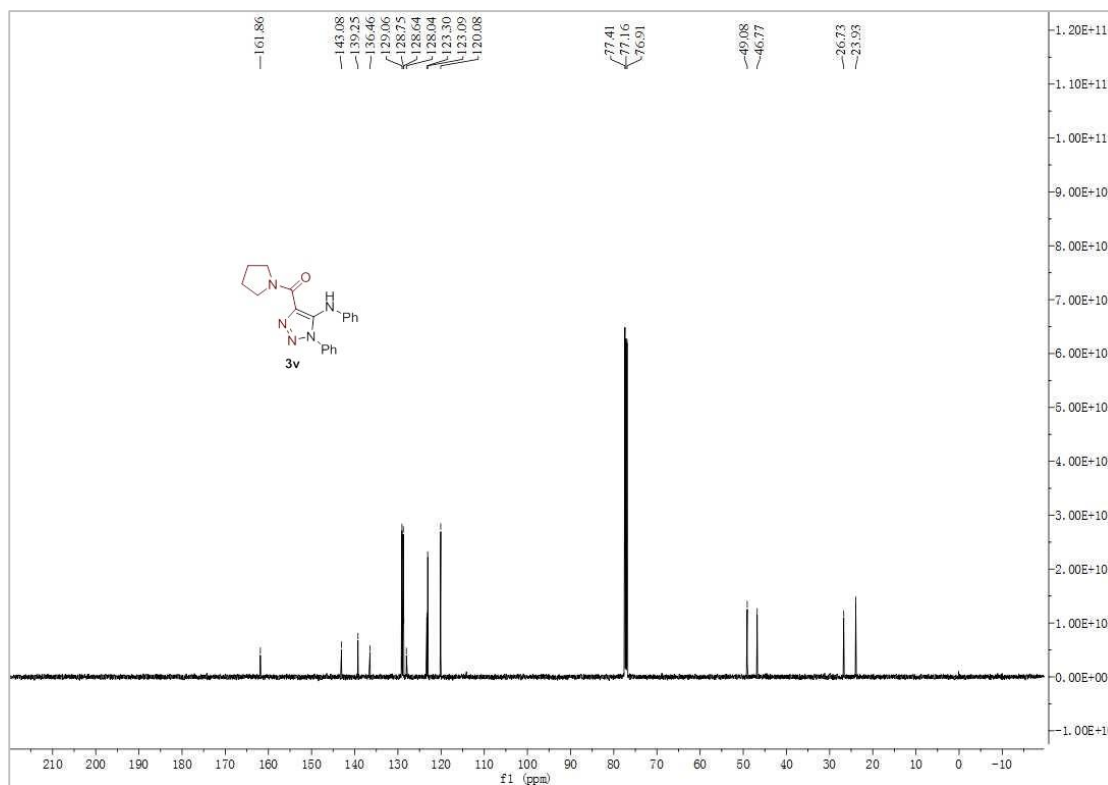

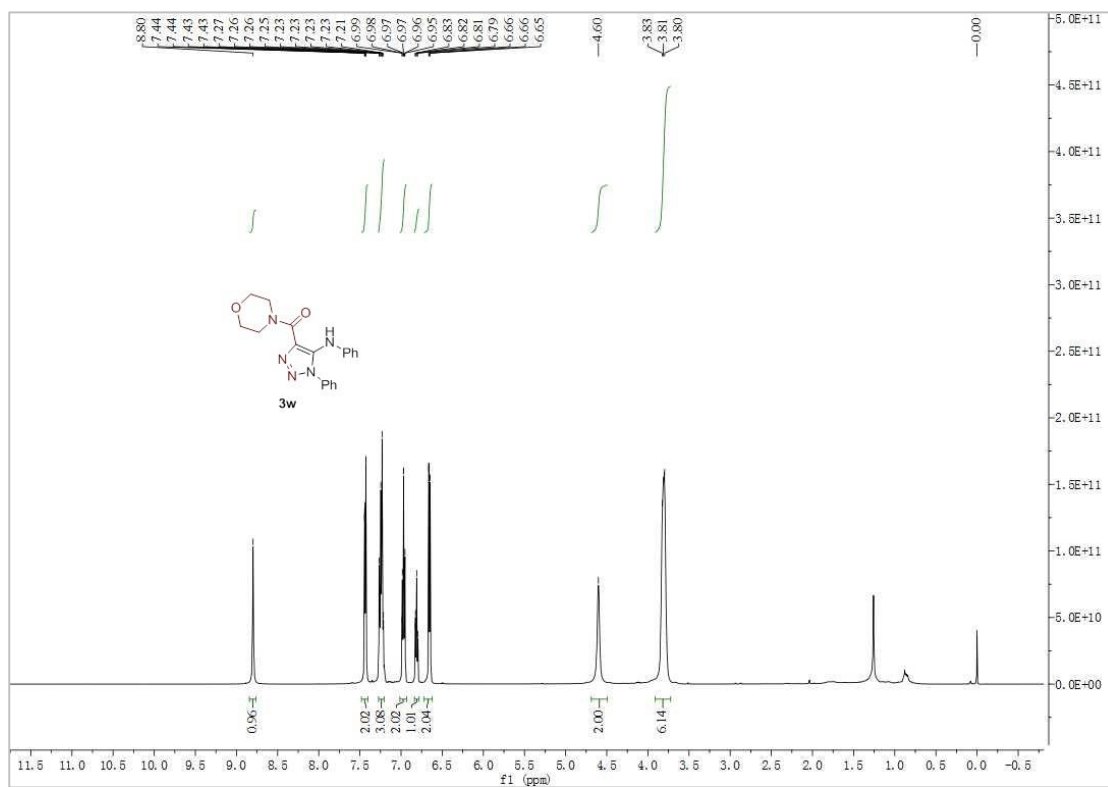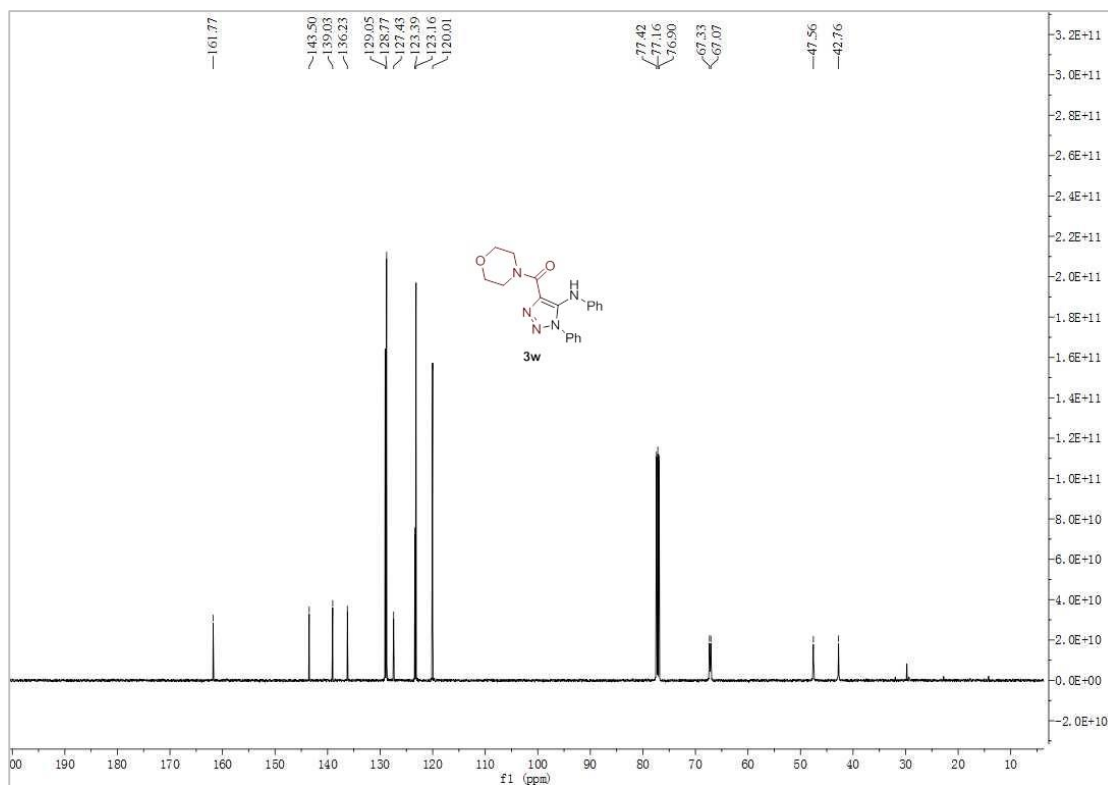

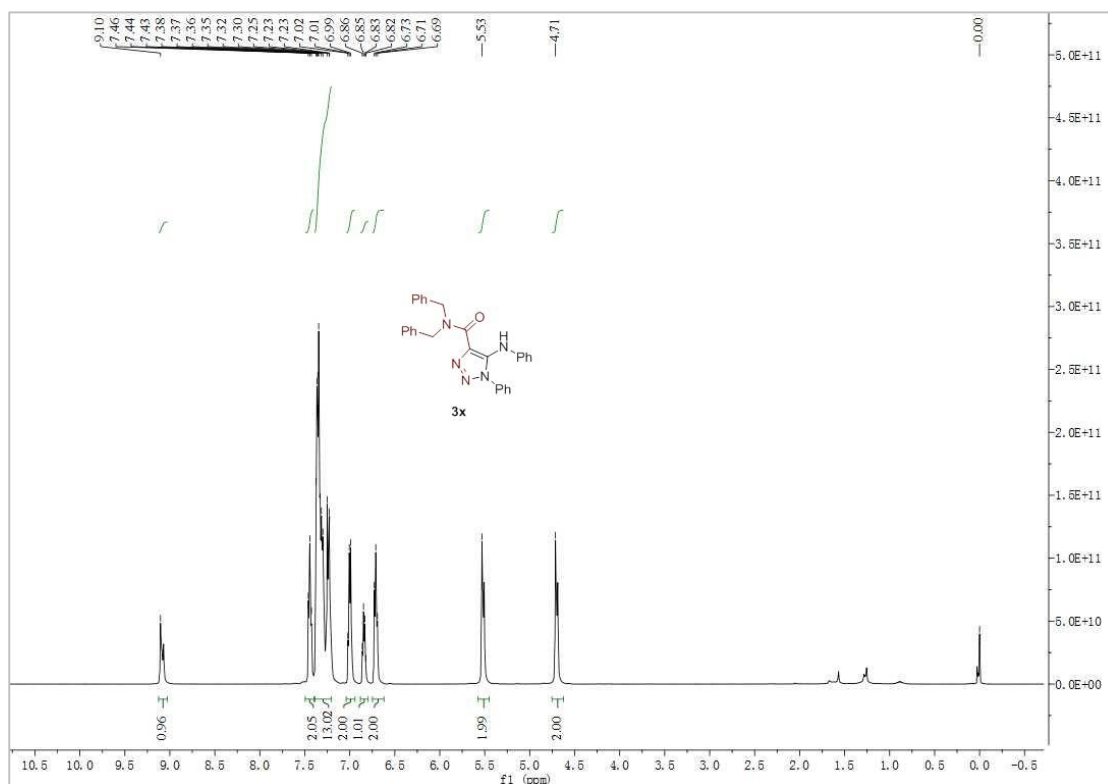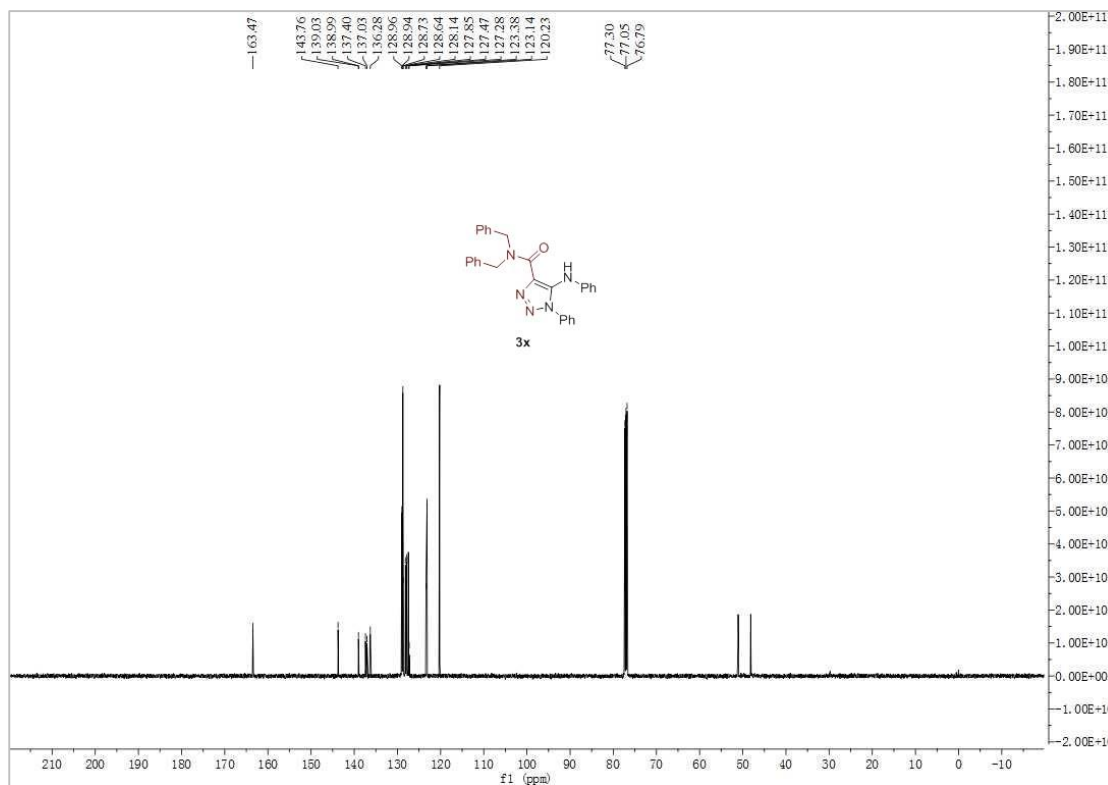

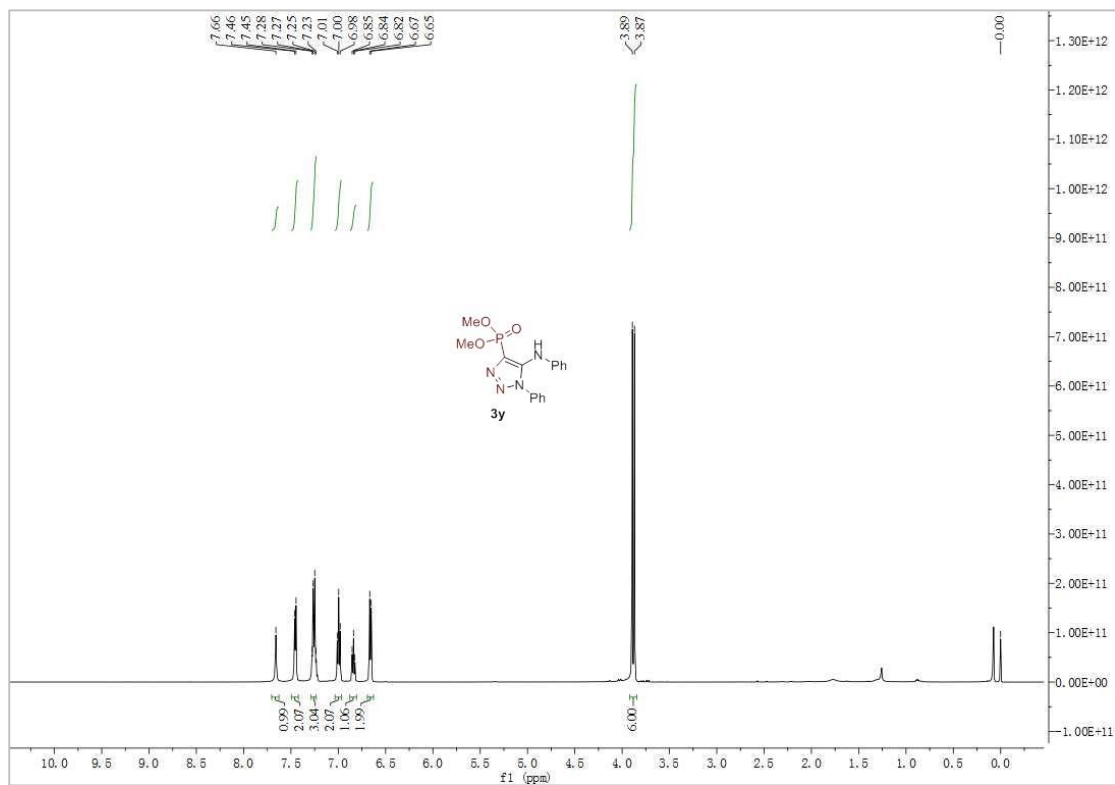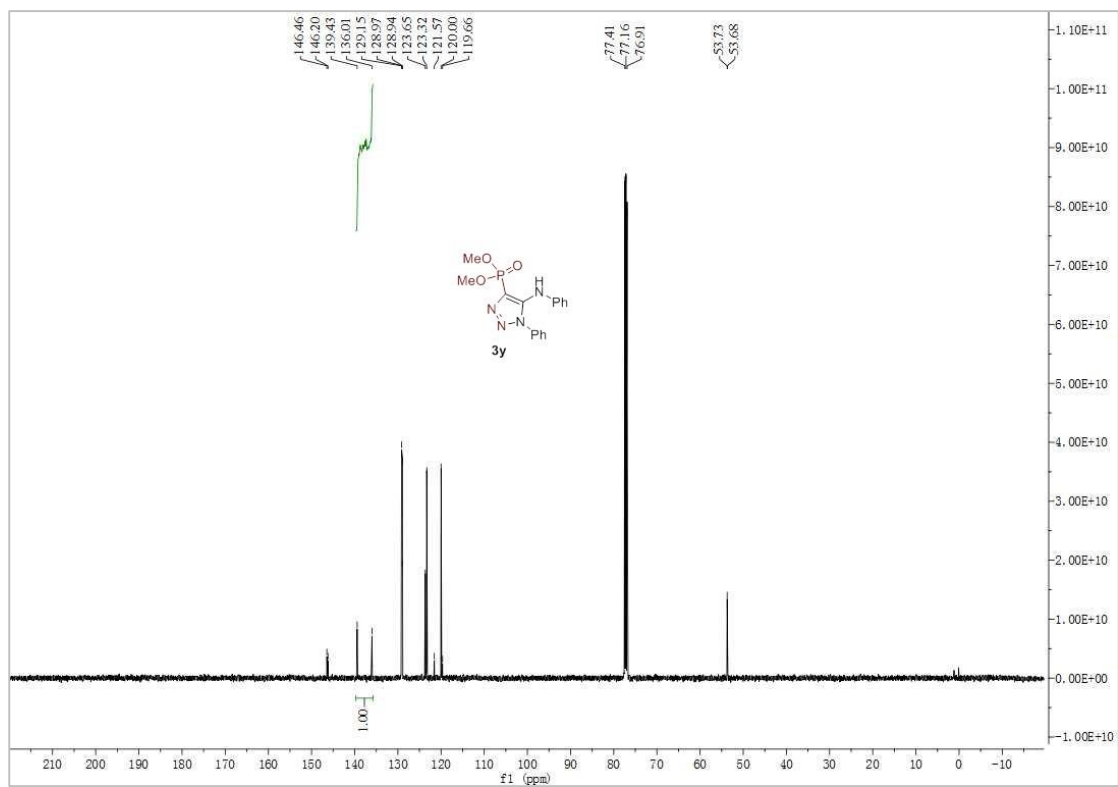

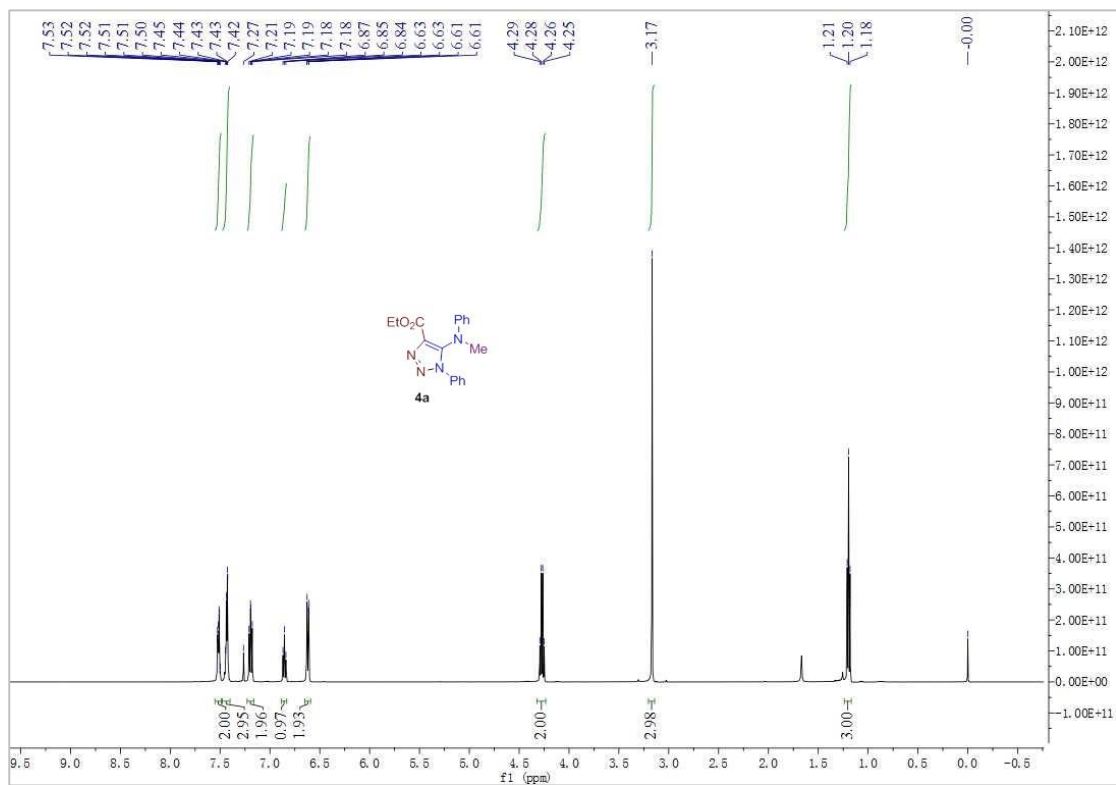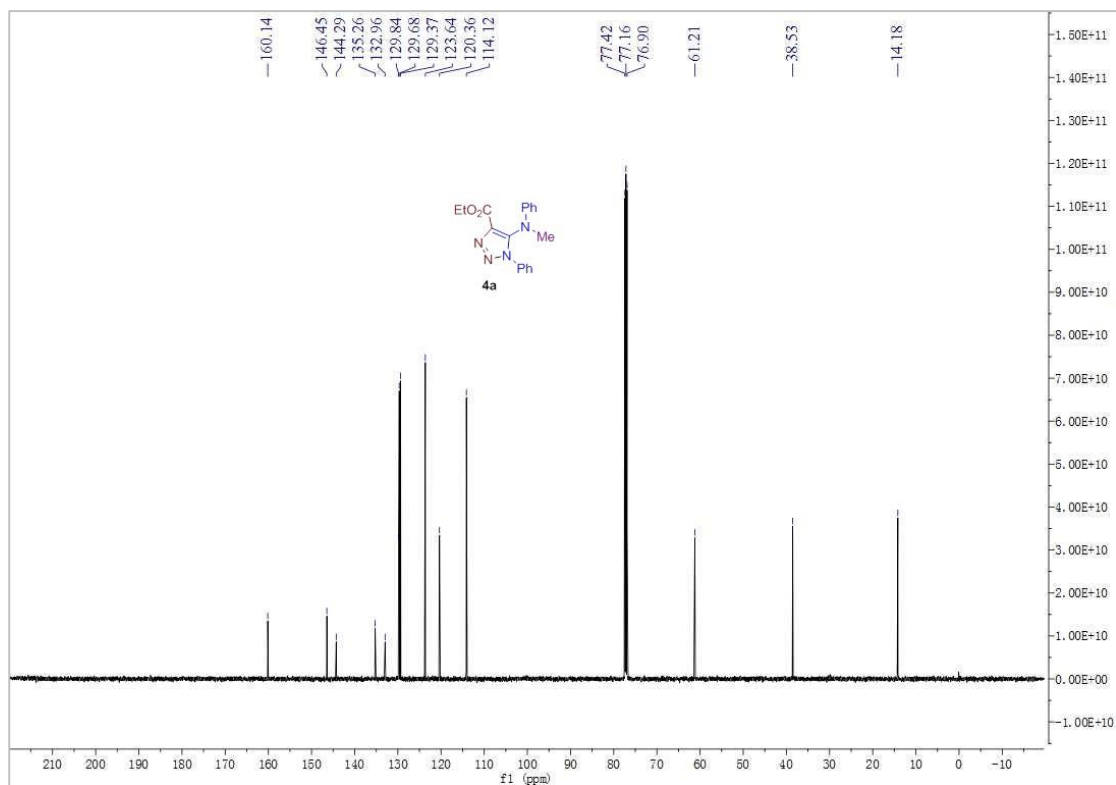

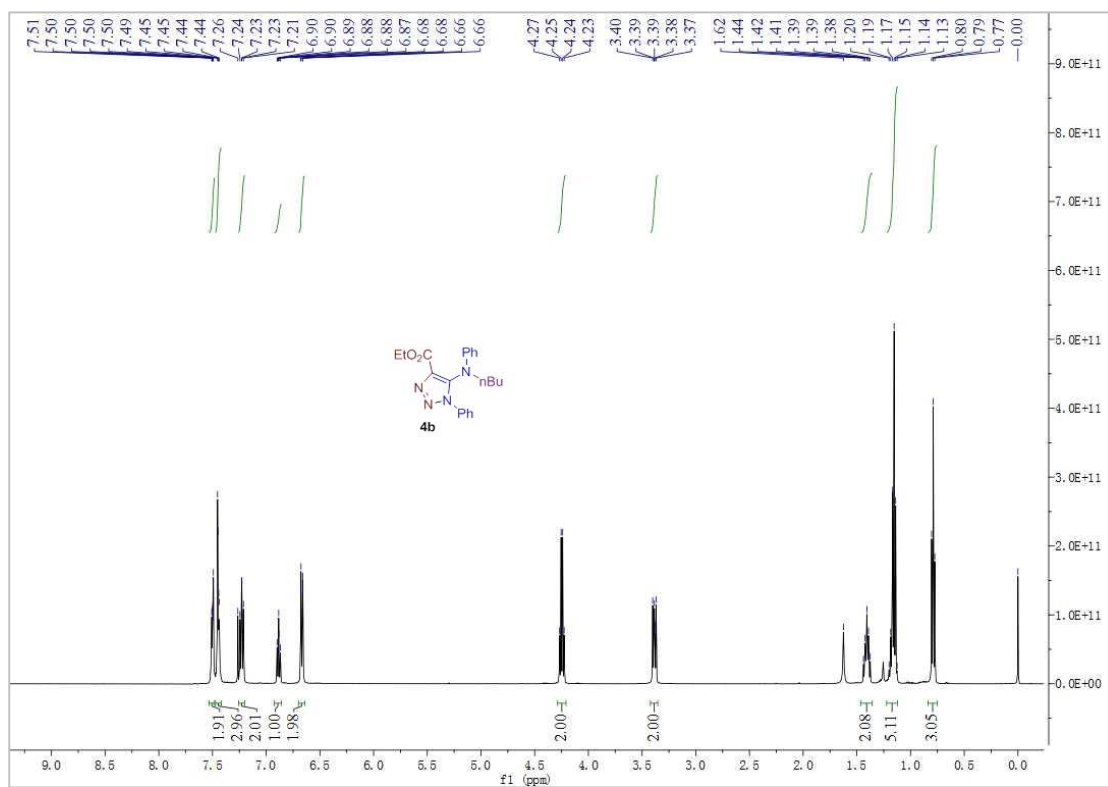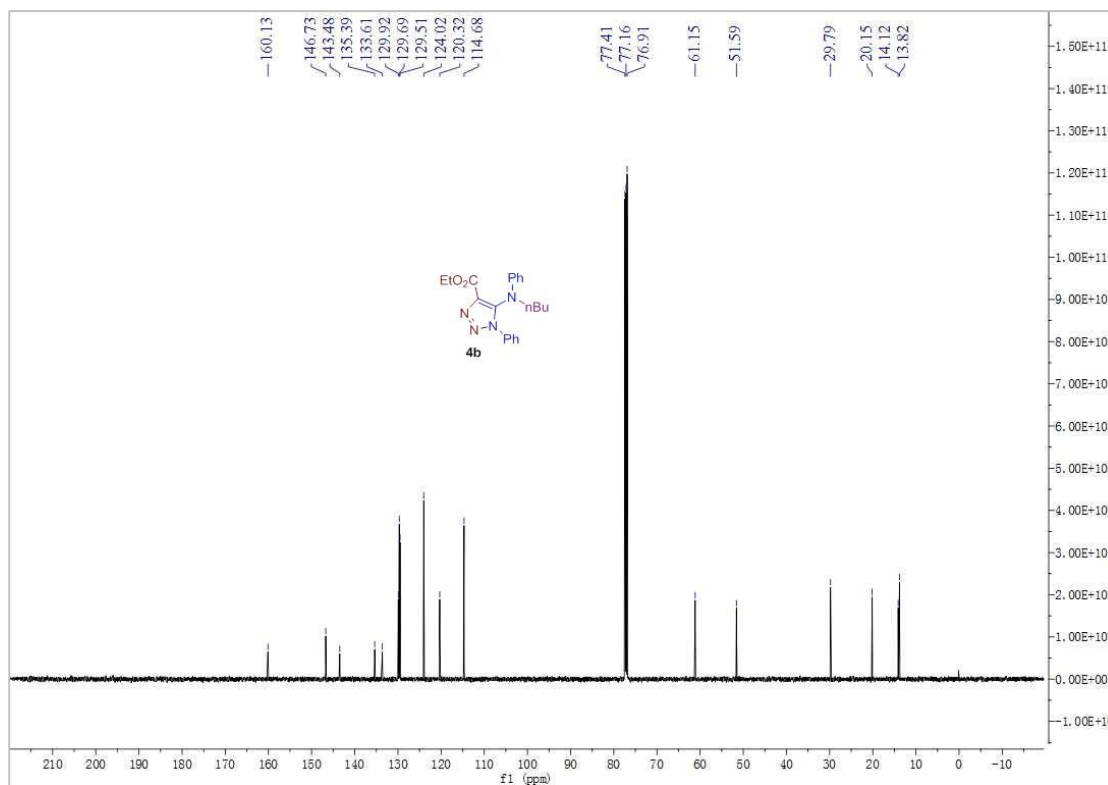



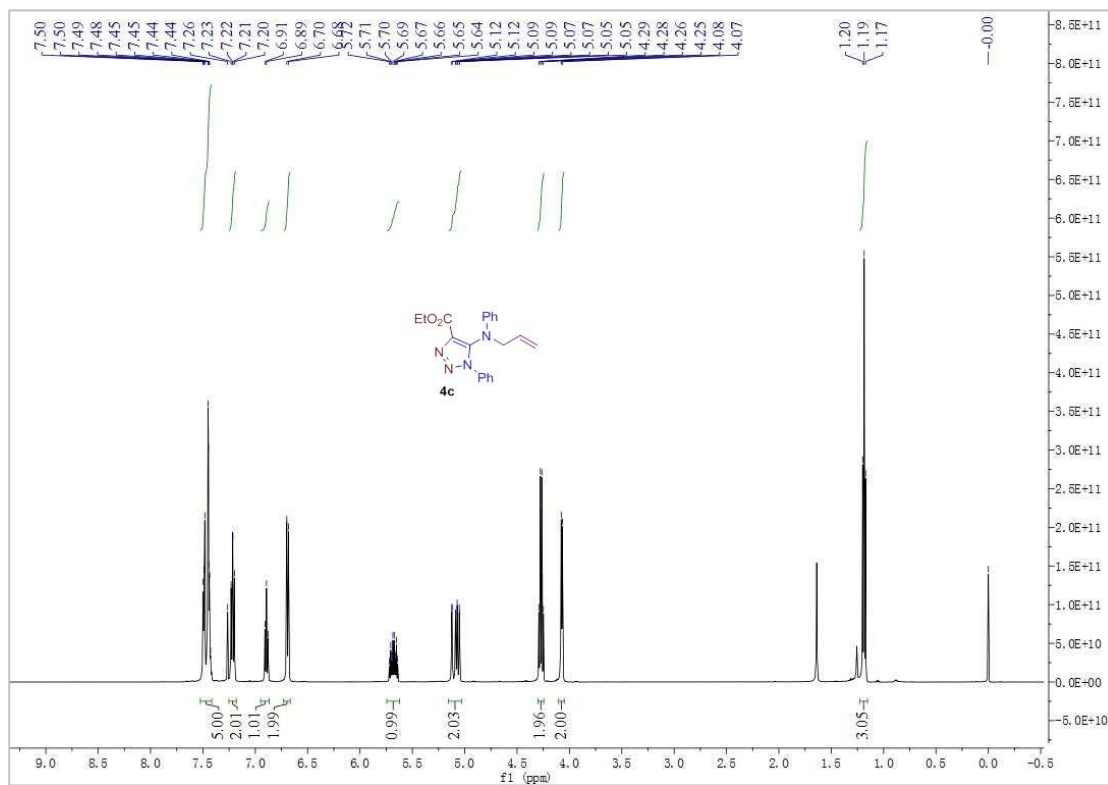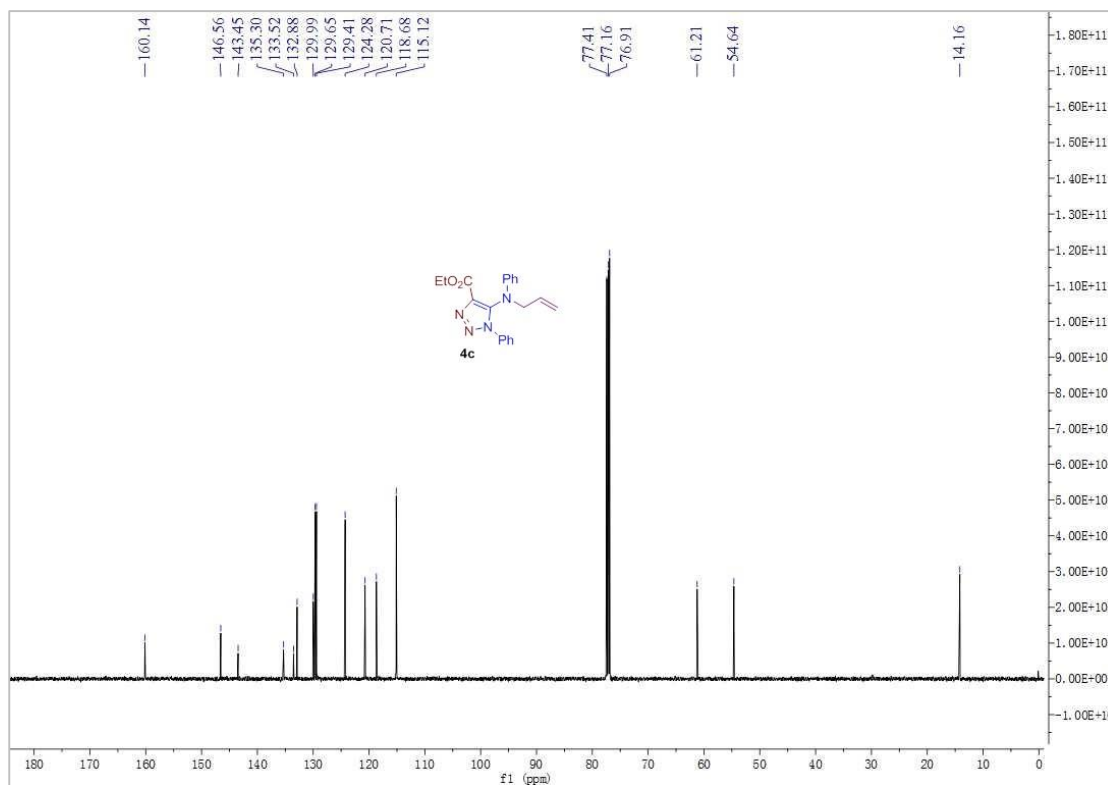

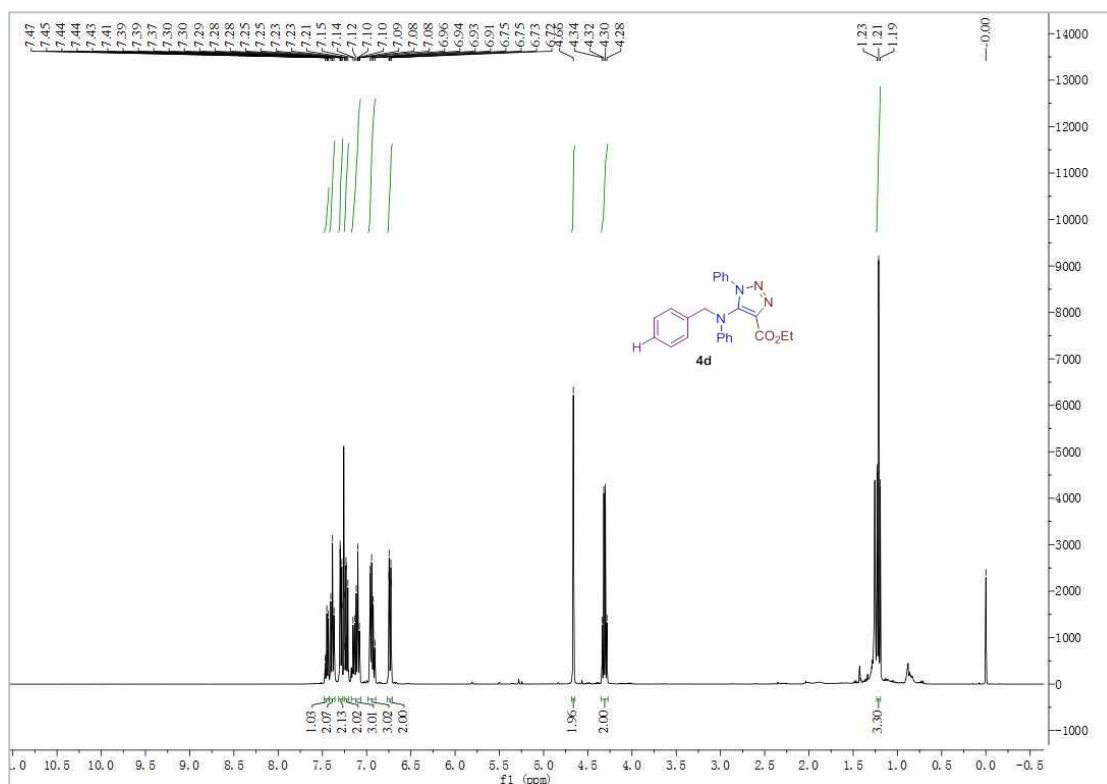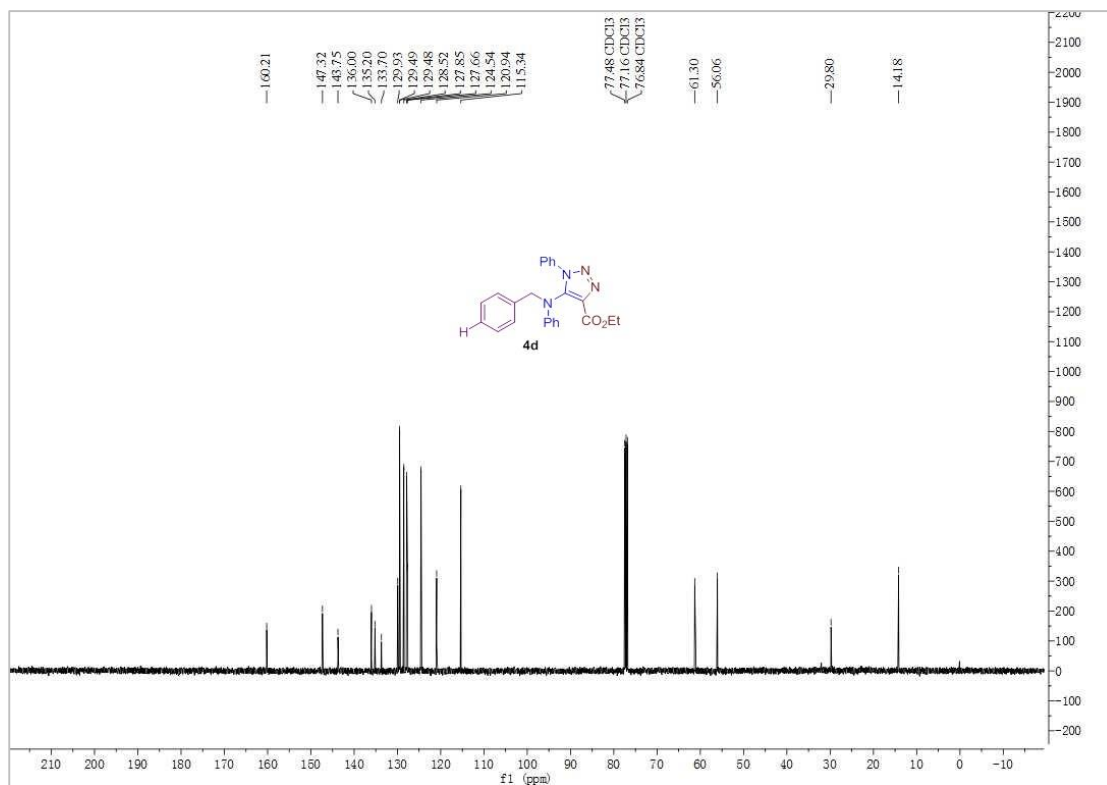

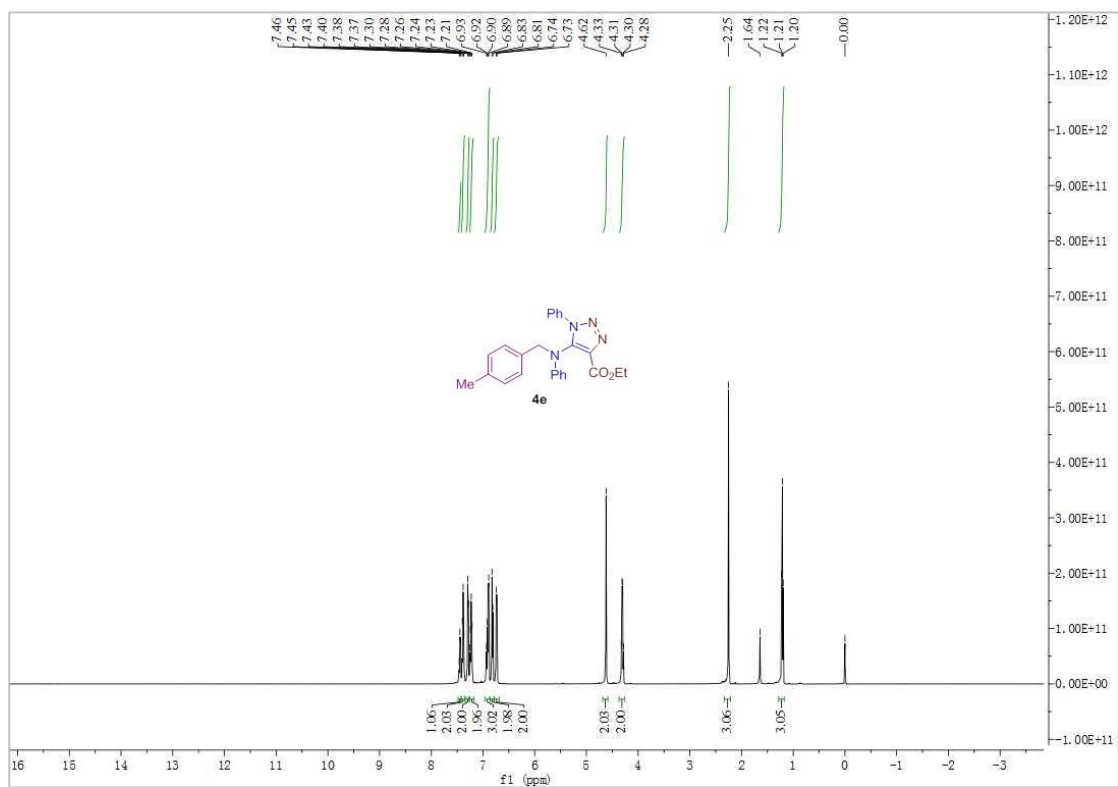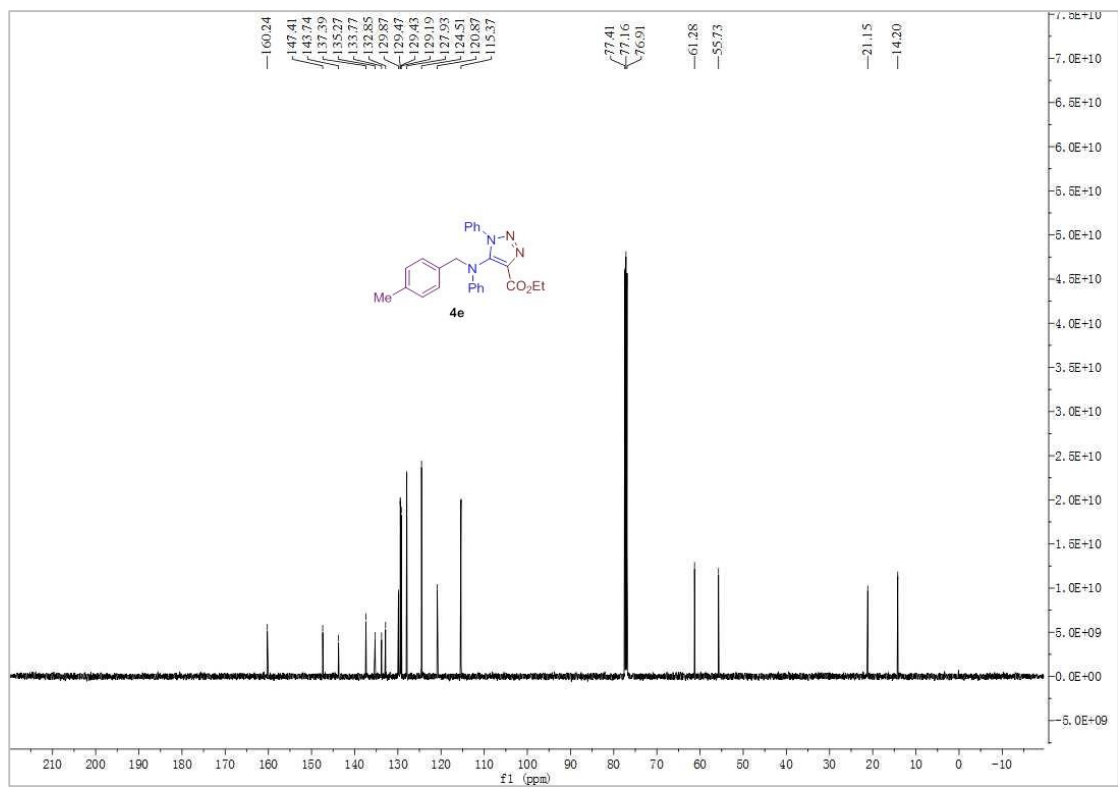

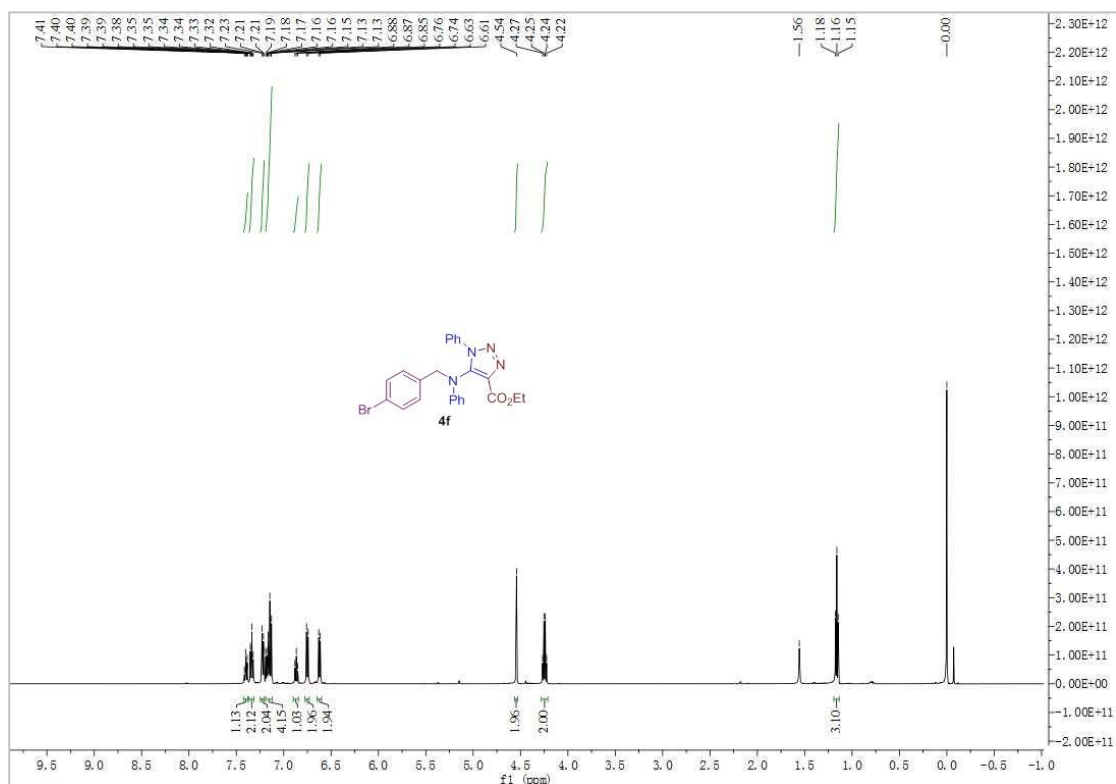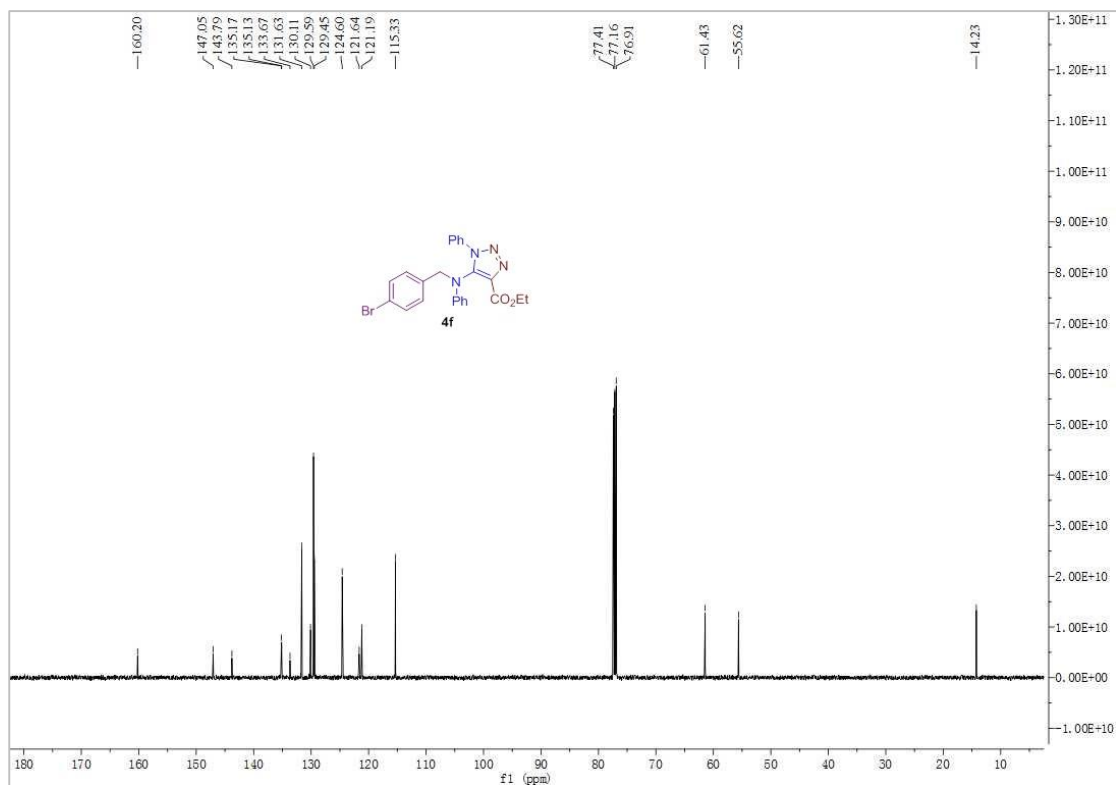

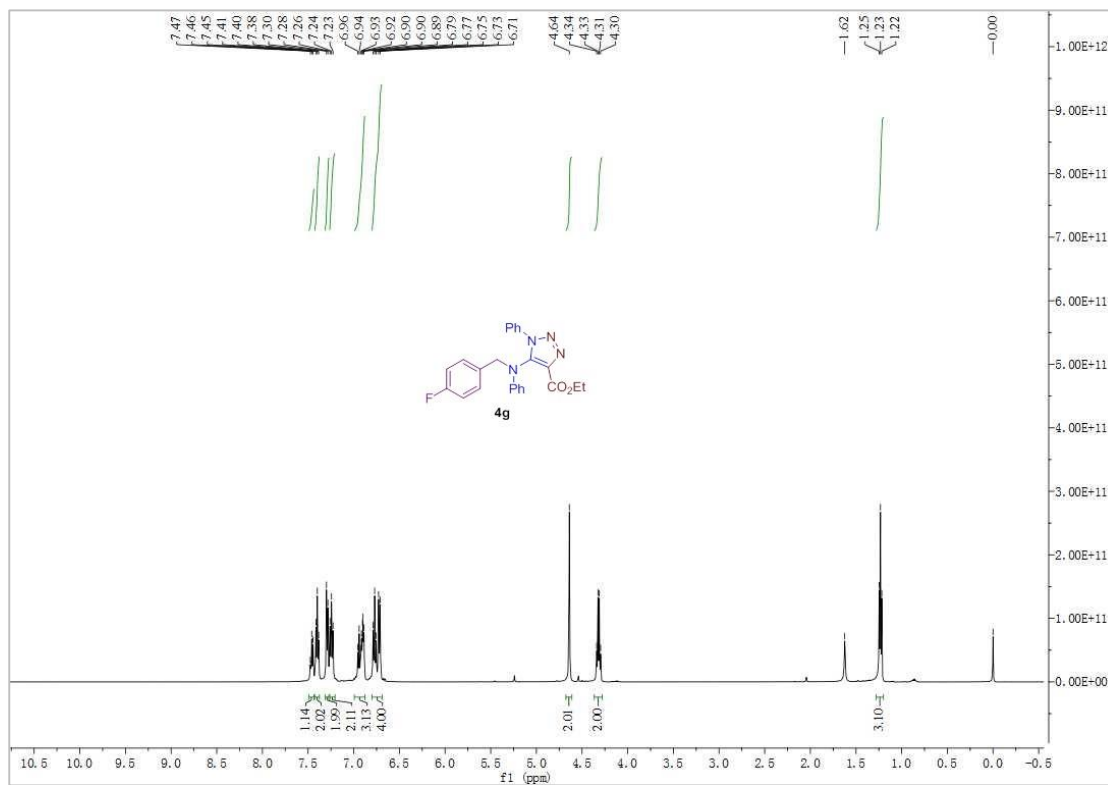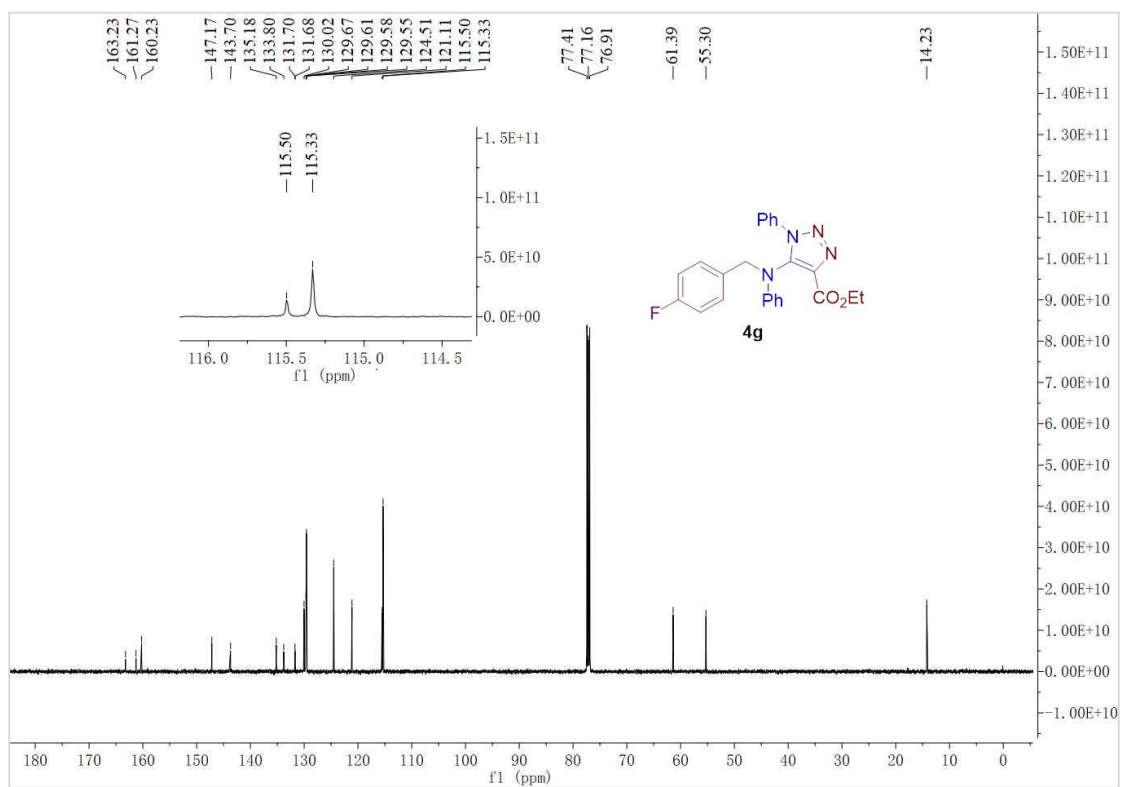

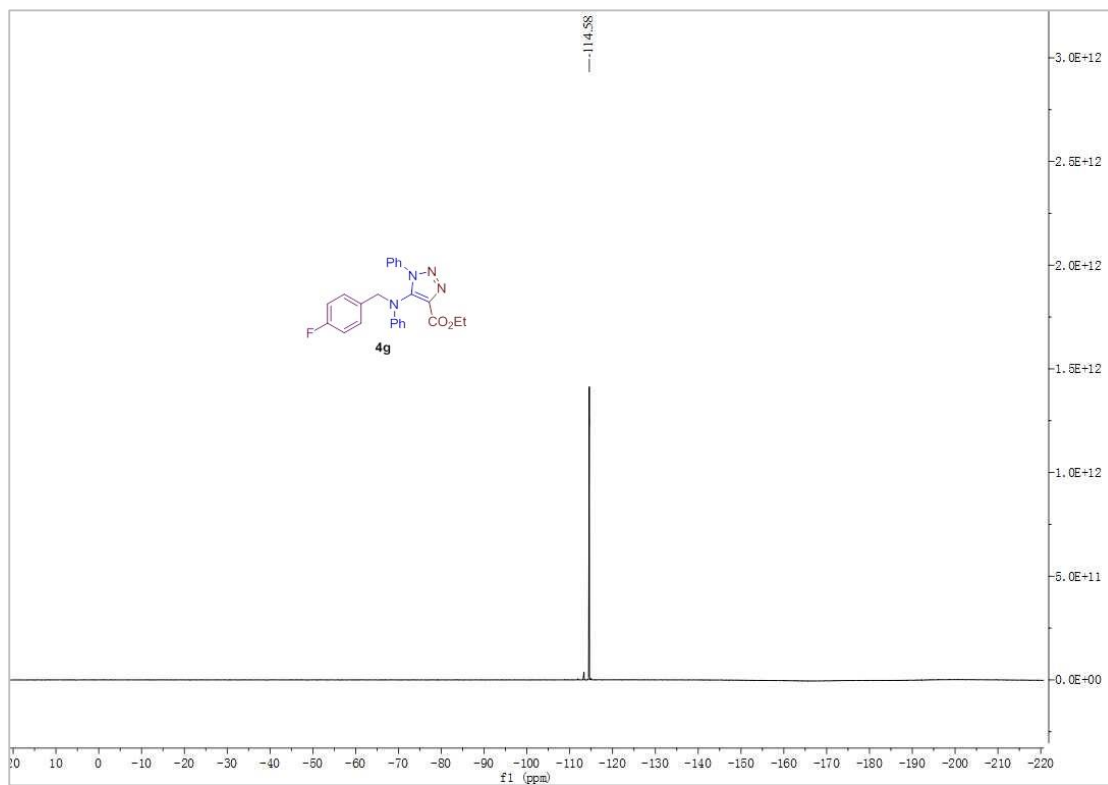

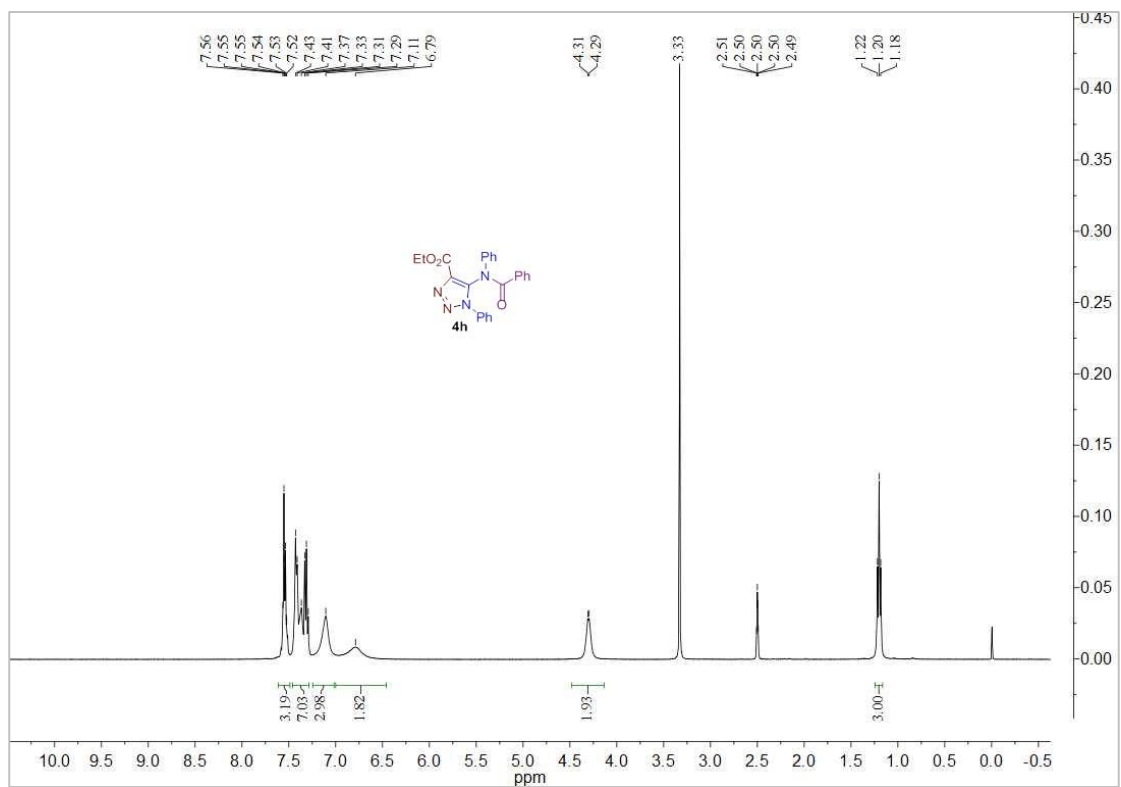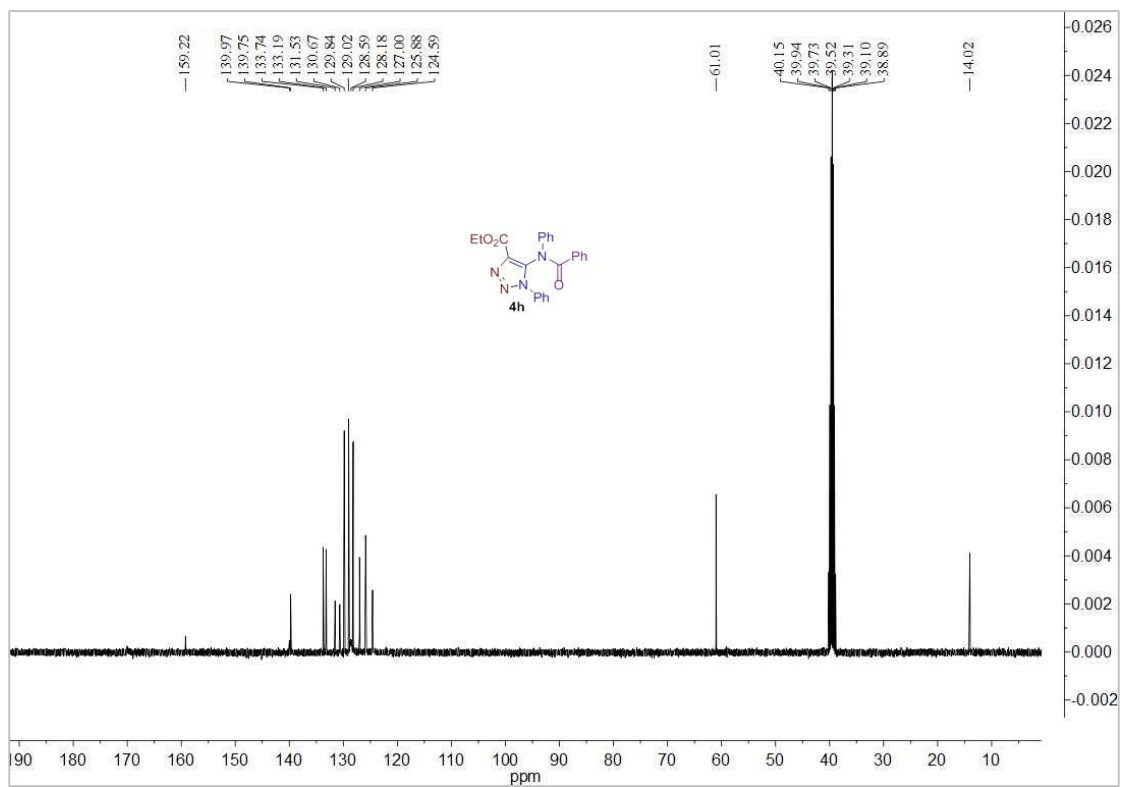

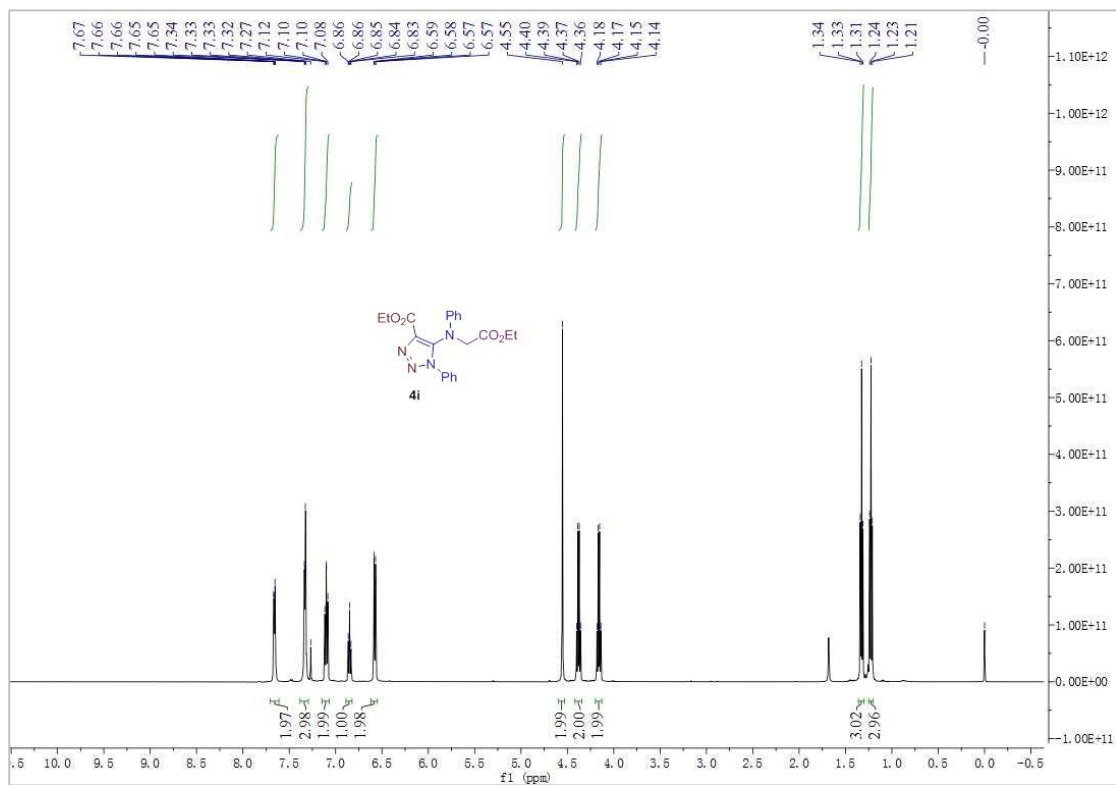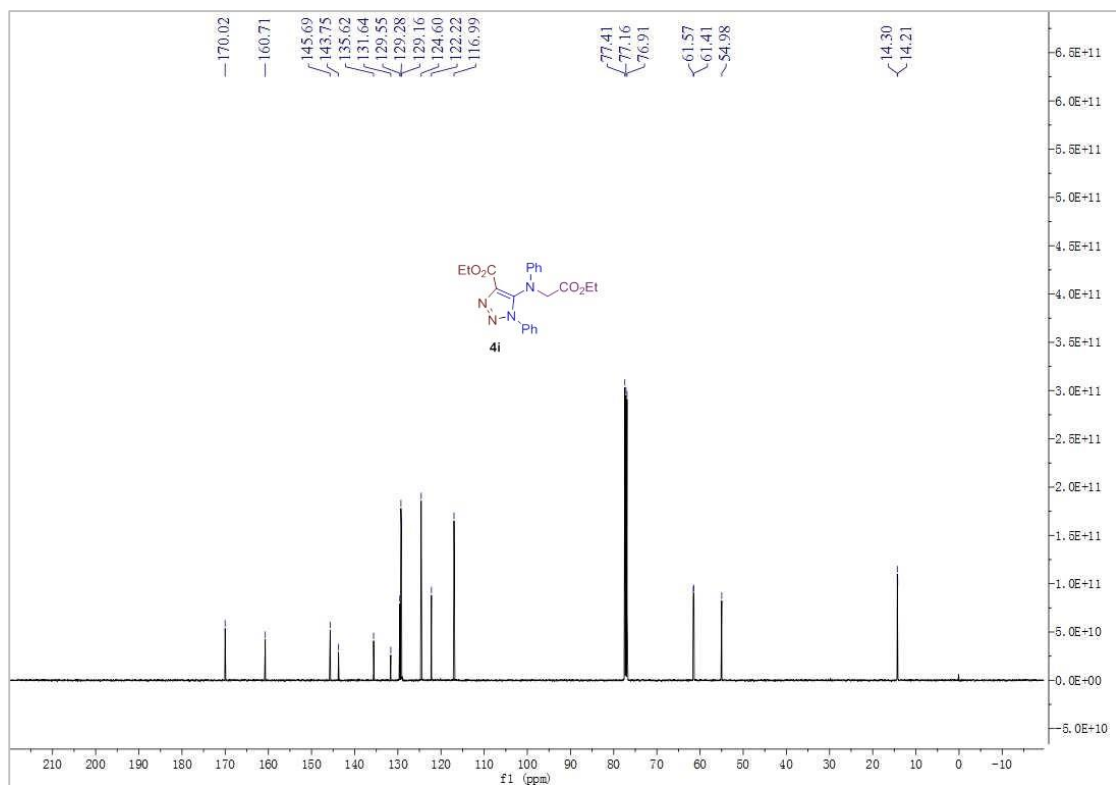



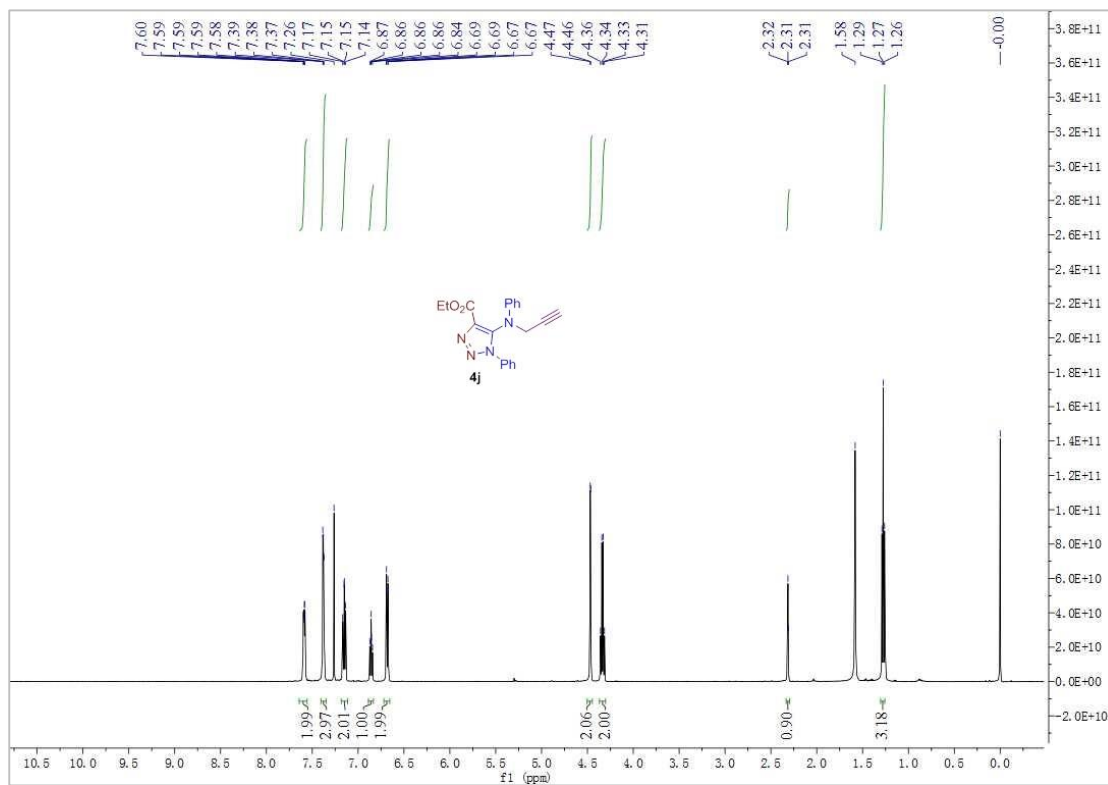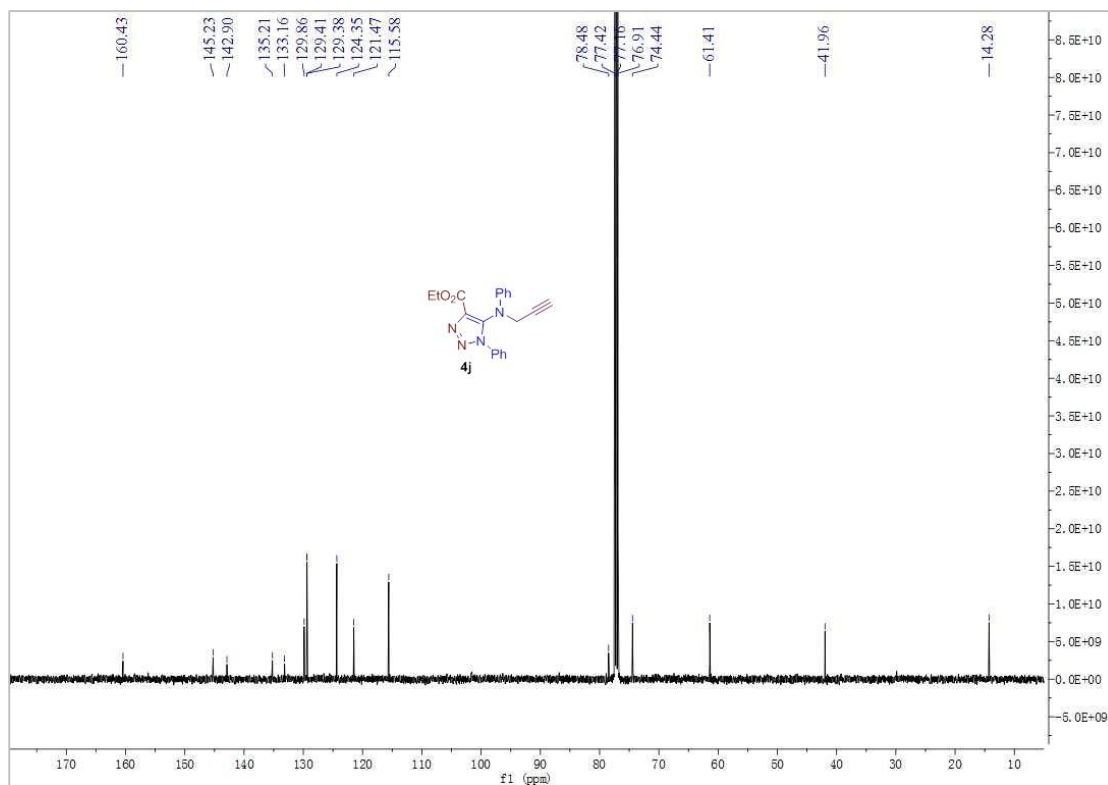

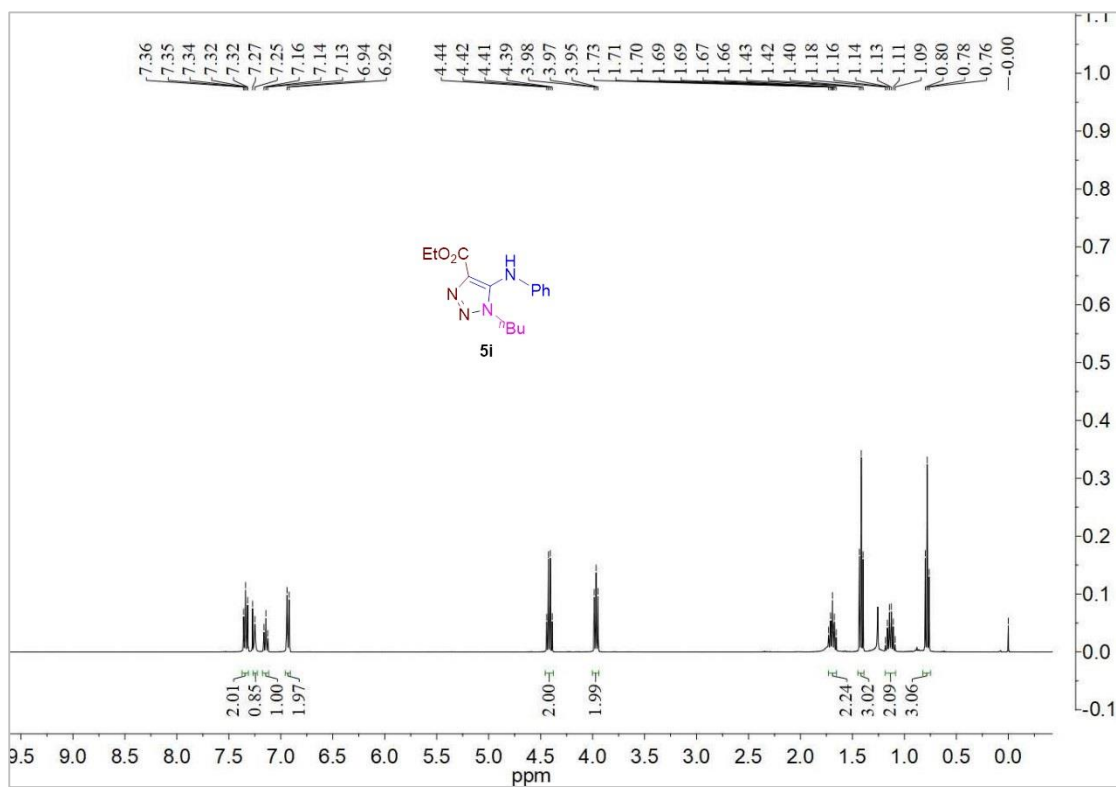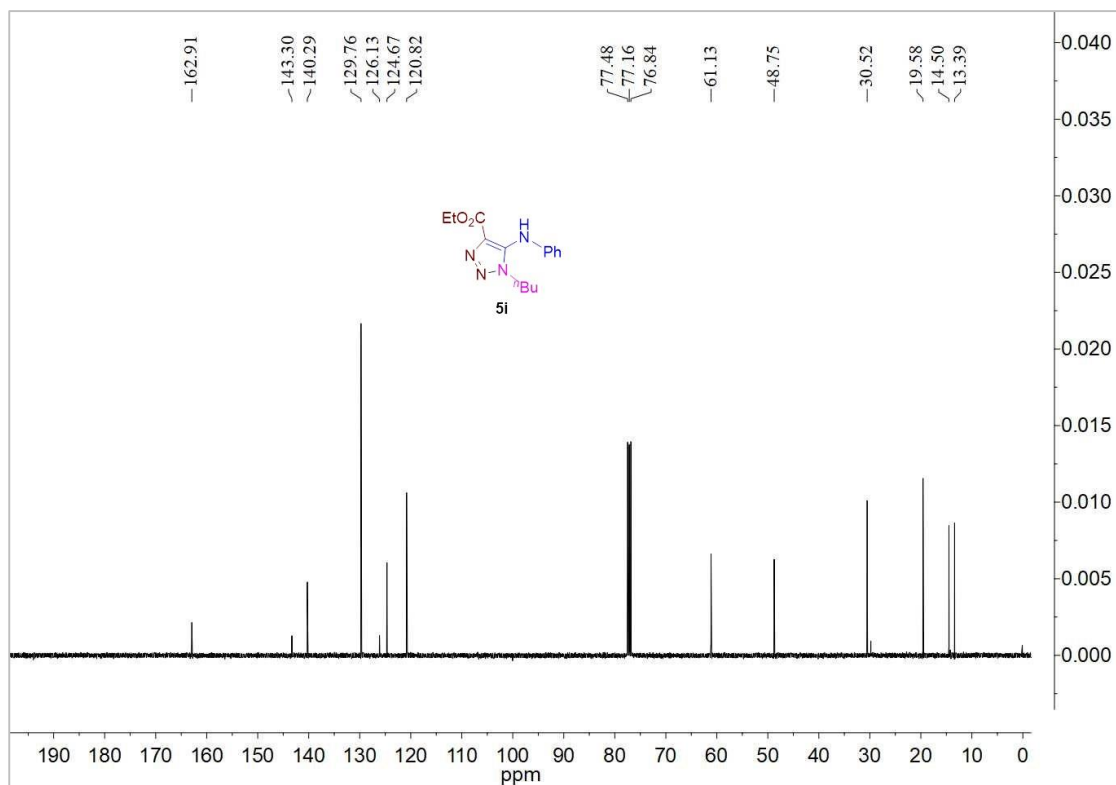

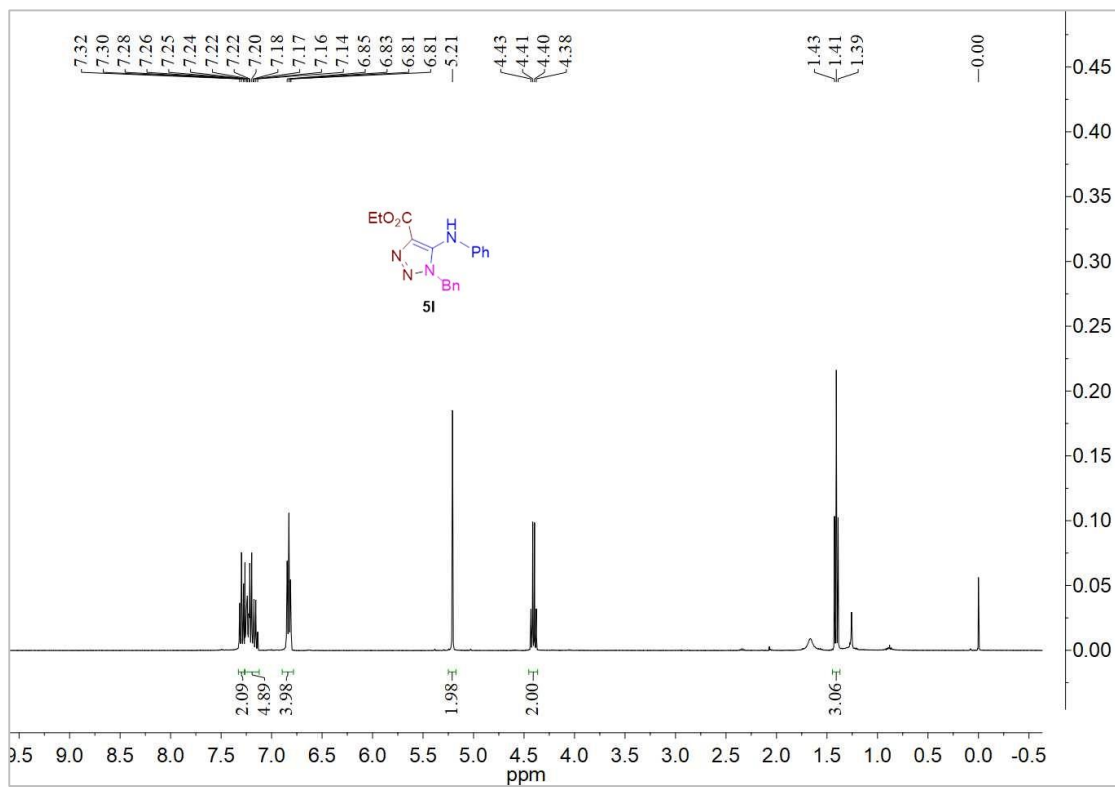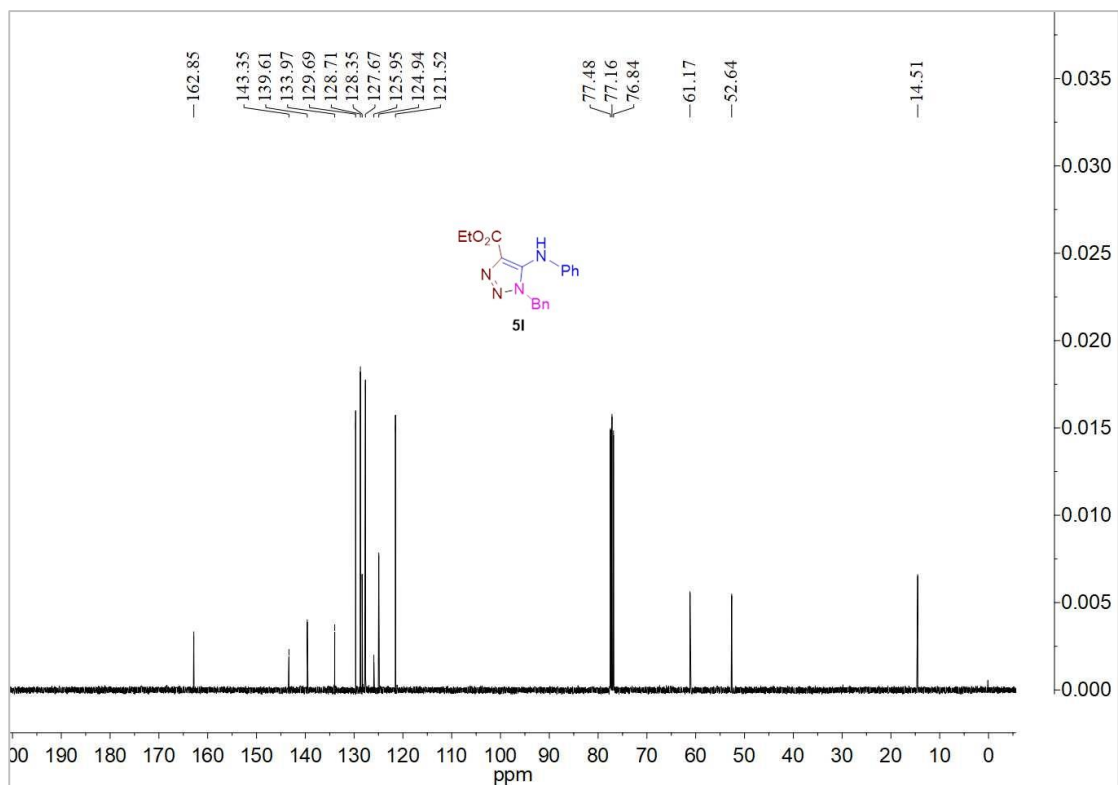

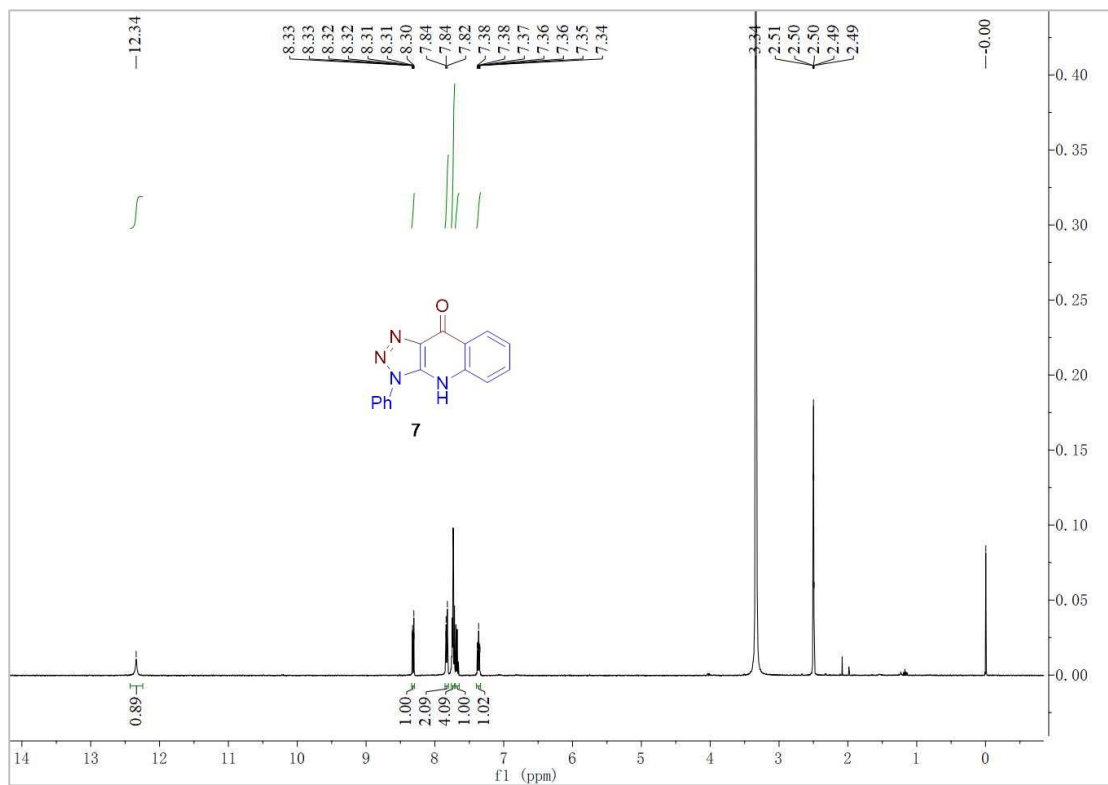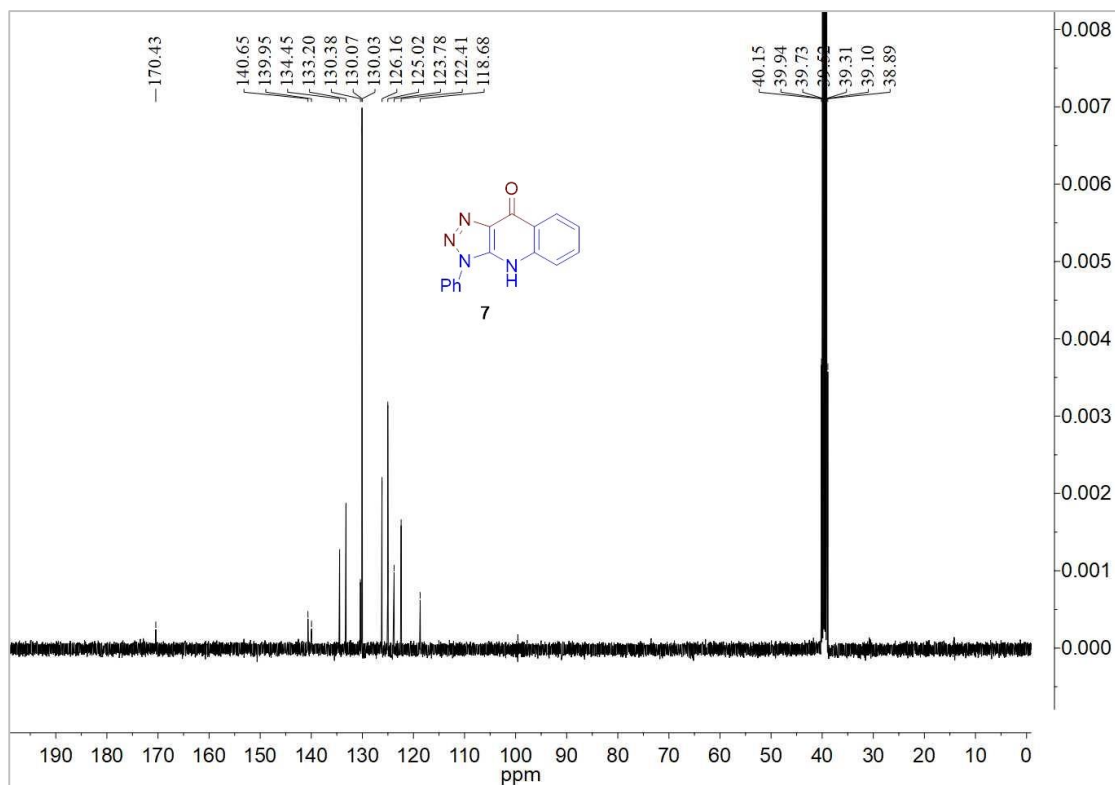

Supplement: d0qo01288b1.pdf [file d0qo01288b1.pdf]
